# Supplementary material
Source: PubMed Central journal article supplement (PMC5207208)
Supplement: NIHMS835023-supplement-SI.pdf [file NIHMS835023-supplement-SI.pdf]

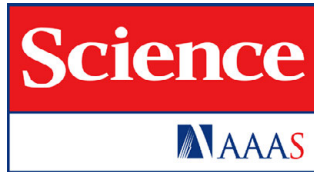

## Supplementary Materials for

### **Architecture of the symmetric core of the nuclear pore**

Daniel H. Lin, Tobias Stuwe, Sandra Schilbach, Emily J. Rundlet, Thibaud Perriches, George Mobbs, Yanbin Fan, Karsten Thierbach, Ferdinand M. Huber, Leslie N. Collins, Andrew M. Davenport, Young E. Jeon, André Hoelz\*

\*correspondence to: [hoelz@caltech.edu](mailto:hoelz@caltech.edu)

#### **This PDF file includes:**

Figs. S1 to S59

Tables S1 to S10

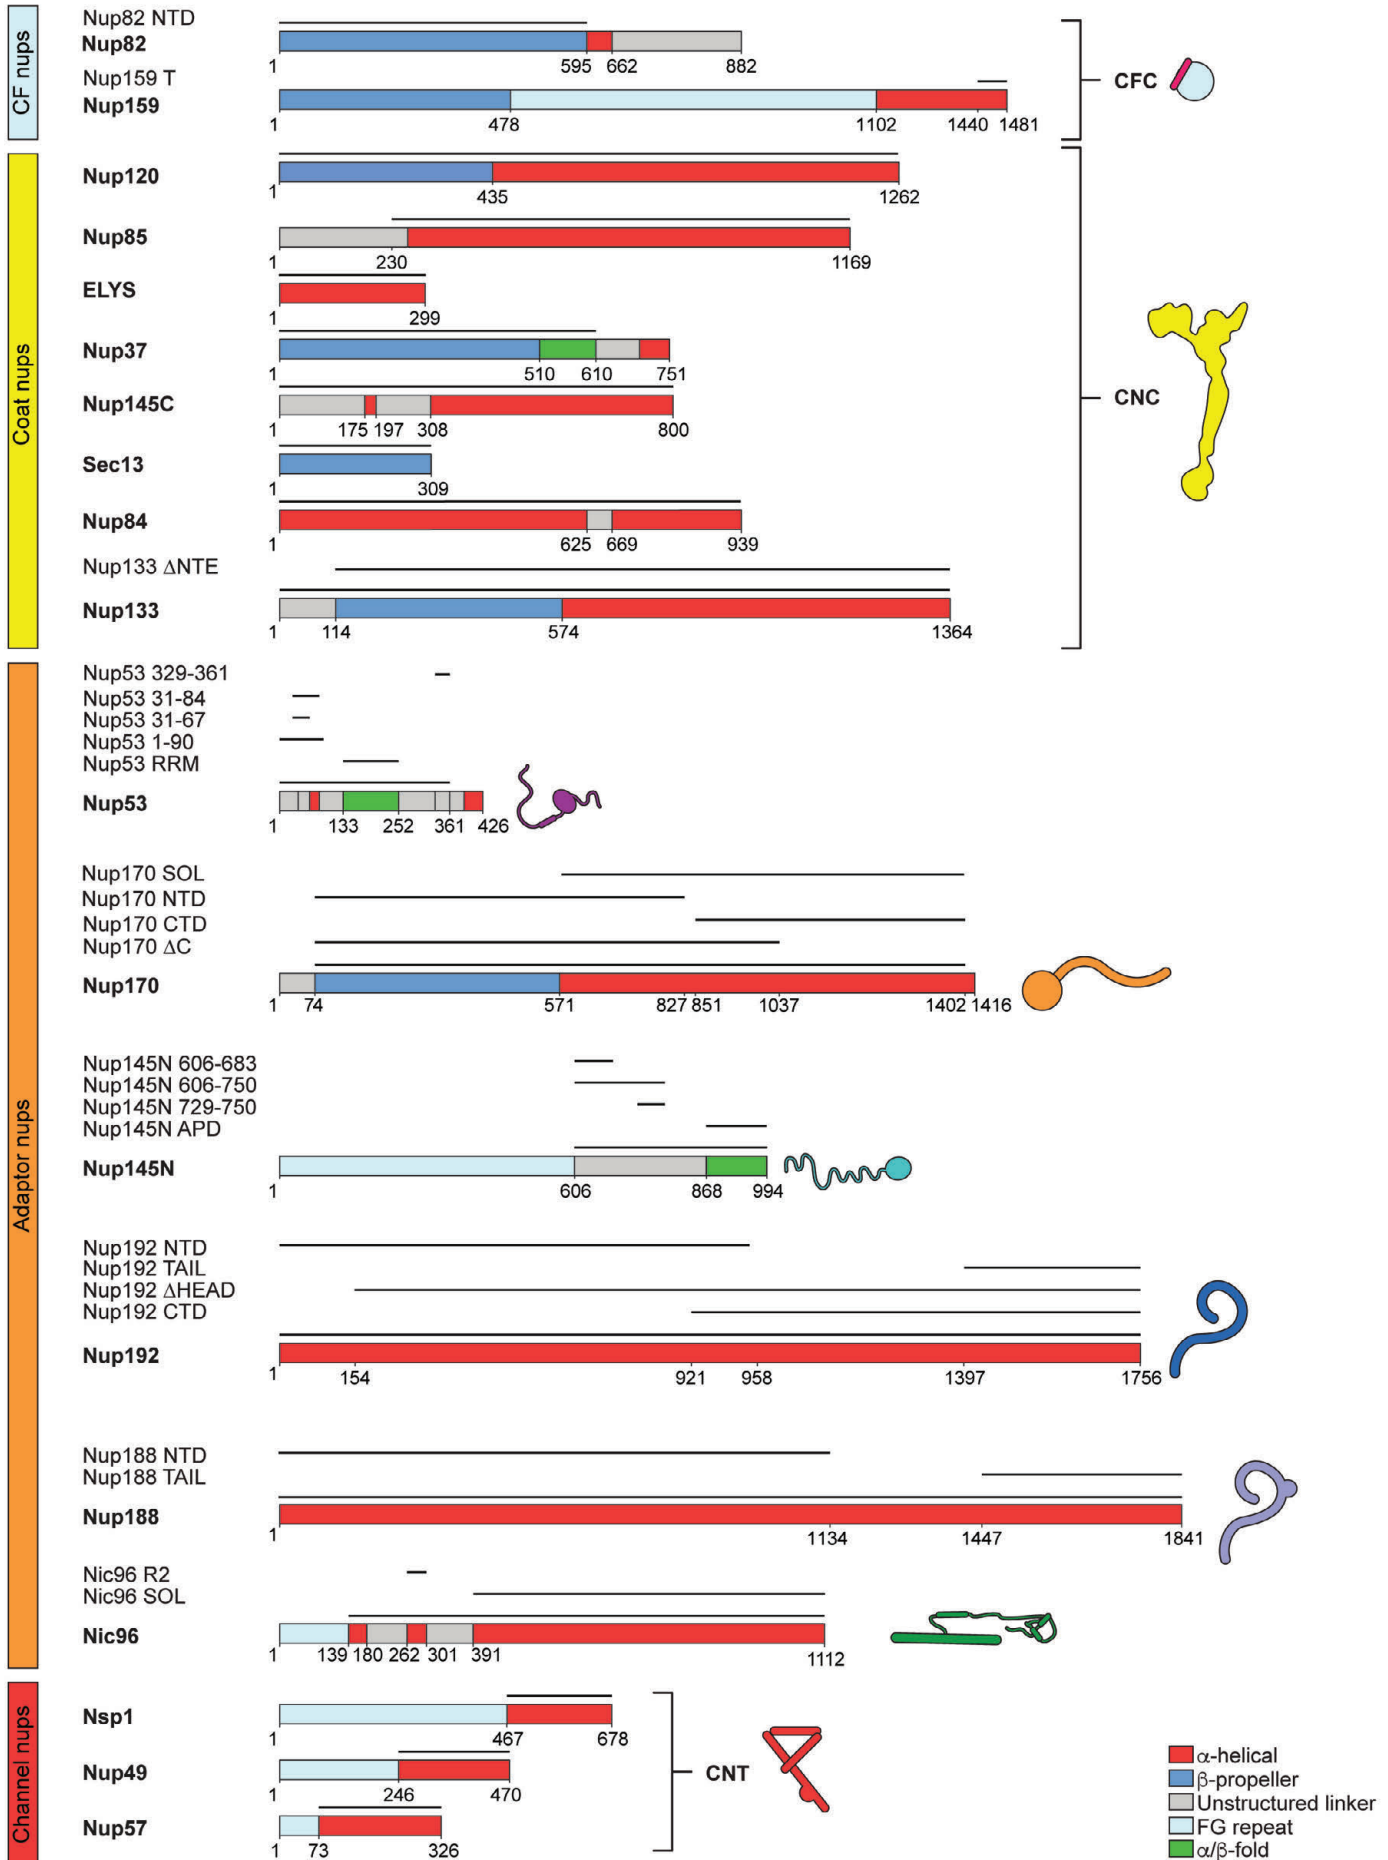

**Fig.S1.**

**Nucleoporin fragments.** Domain boundaries of all nucleoporin fragments used throughout the text are indicated by black lines.

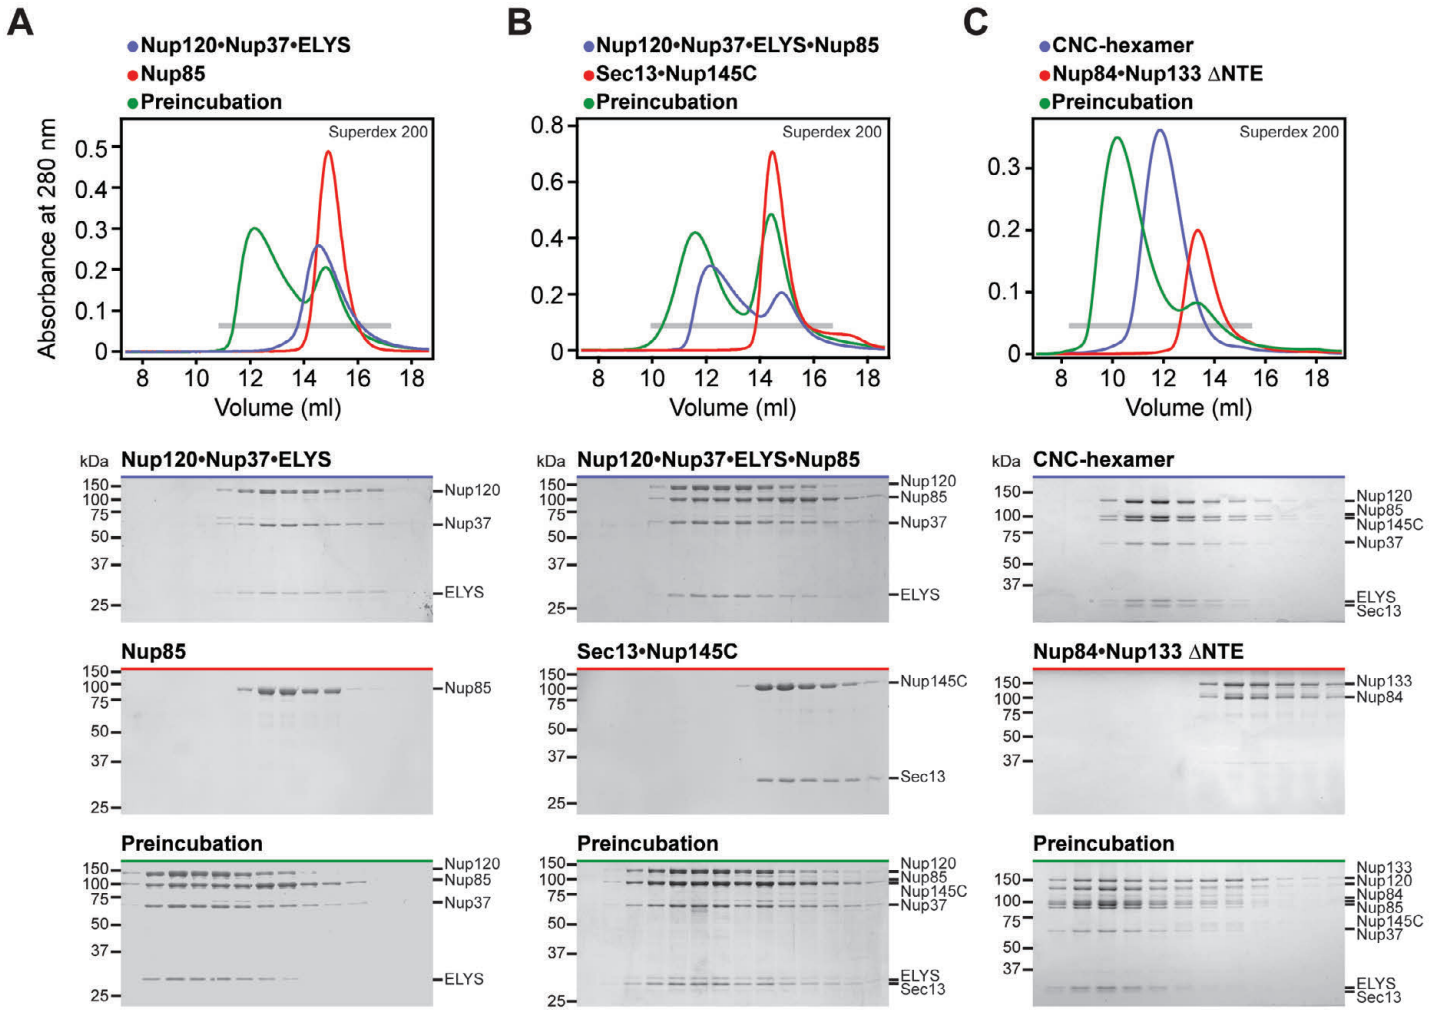

**Fig. S2.**

**Reconstitution of the CNC.** SEC and SDS-PAGE analysis for the reconstitution of **(A)** the Nup120•Nup37•ELYS•Nup85 hetero-tetramer, **(B)** the CNC-hexamer, and **(C)** the CNC-octamer. SEC profiles of nucleoporins or nucleoporin complexes are shown individually (blue and red) and after their preincubation (green). All SEC profiles were obtained using a Superdex 10/300 GL column. Gray bars indicate fractions that were resolved on SDS-PAGE gels and visualized by Coomassie staining. The CNC-octamer could only be reconstituted with a Nup133 construct lacking the NTE.

**A**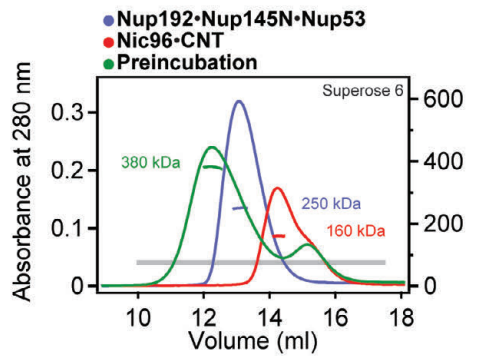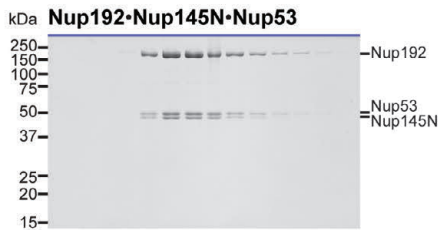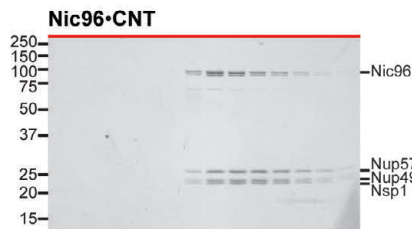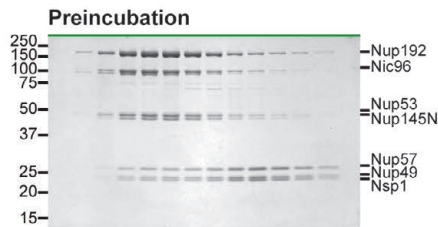**B**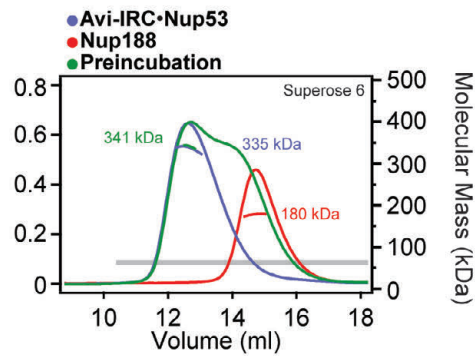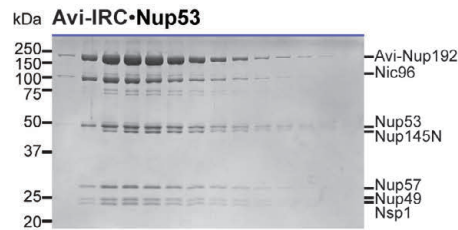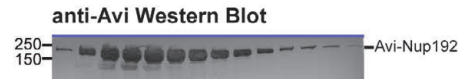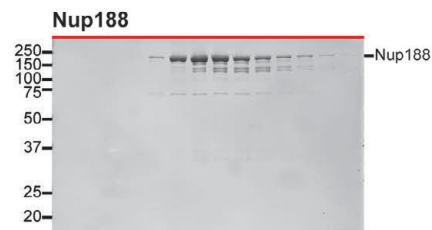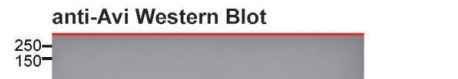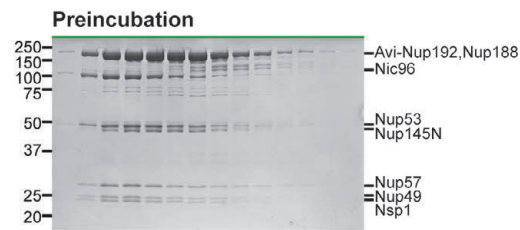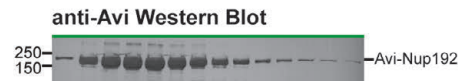

**Fig. S3.**

**Reconstitution of the IRC•Nup53 complex.** SEC-MALS and SDS-PAGE analysis of **(A)** the reconstitution of the IRC•Nup53 hetero-heptamer and **(B)** the interaction of IRC•Nup53 with Nup188. SEC-MALS profiles of nucleoporins or nucleoporin complexes are shown individually (blue and red) and after their preincubation (green). All SEC profiles were obtained using a Superose 6 10/300 GL column. Measured molecular masses are indicated for the peak fractions. Gray bars indicate fractions that were resolved on SDS-PAGE gels and visualized by Coomassie staining or by immunoblotting with a mouse anti-AviTag antibody. As Nup188 and Nup192 cannot be distinguished by SDS-PAGE analysis, lack of Nup192 displacement from the IRC by Nup188 was confirmed by western blotting against Avi-tagged Nup192.

**A**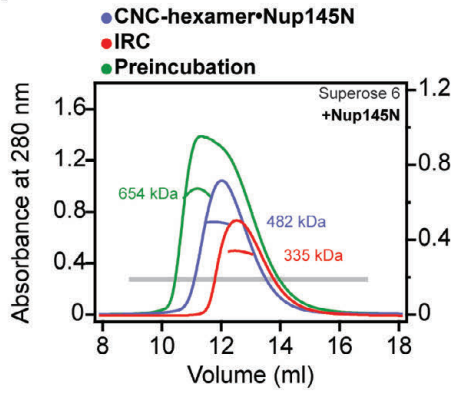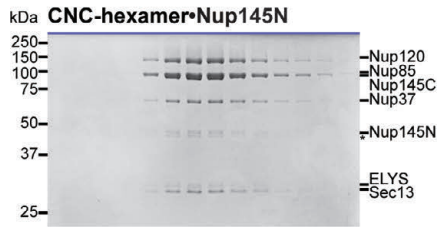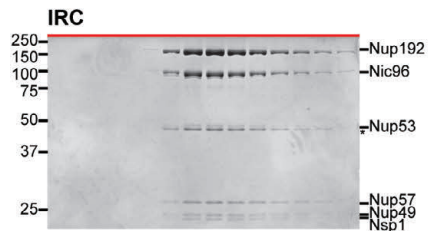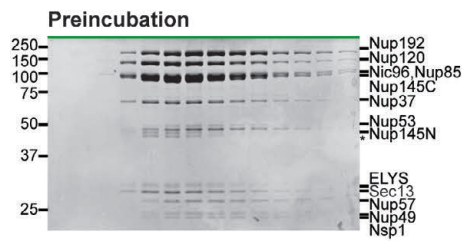**B**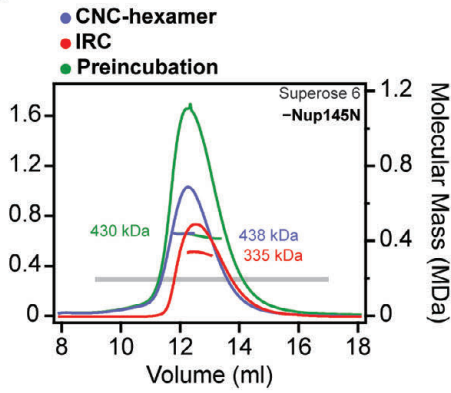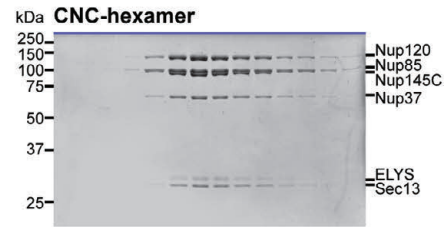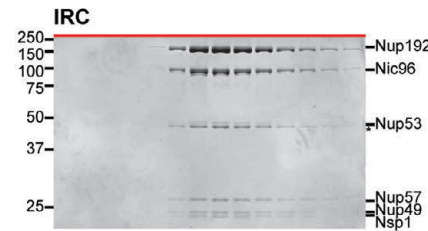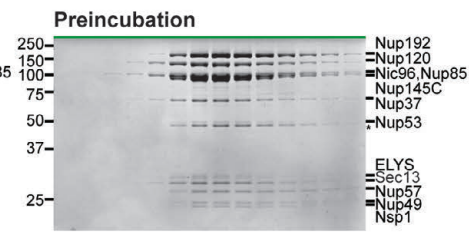



**C**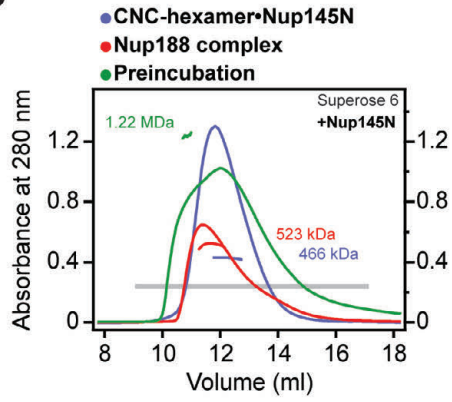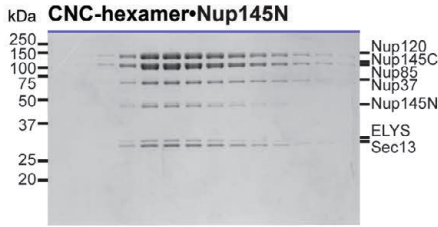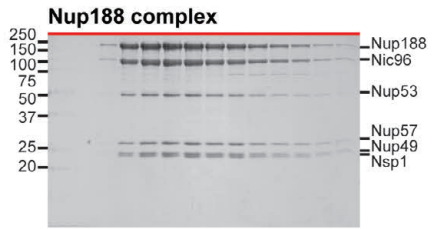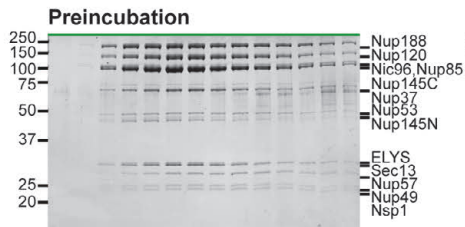**D**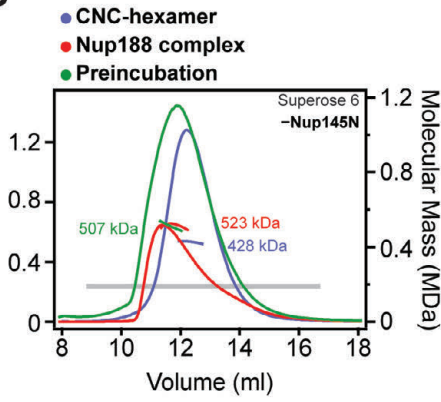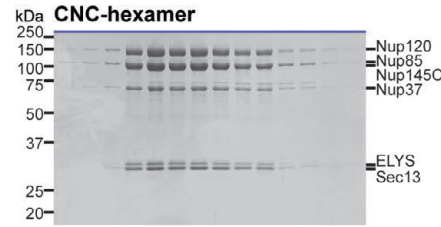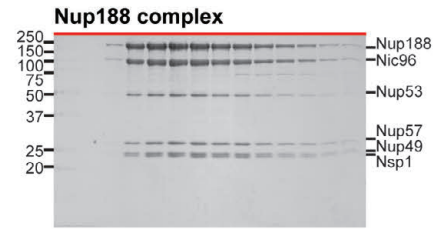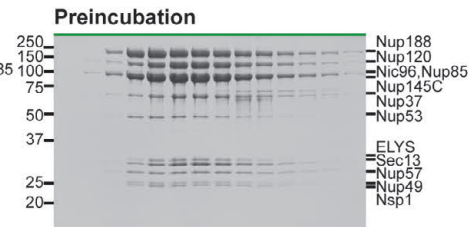

**Fig. S4.**

**Reconstitution of NPC core protomers. (A-D)** SEC-MALS and SDS-PAGE analysis corresponding to [Fig. 1, D to G](#). SEC-MALS profiles of nucleoporin complexes are shown individually (blue and red) and after their preincubation (green). All SEC profiles were obtained using a Superose 6 10/300 GL column. Measured molecular masses are indicated for the peak fractions. Gray bars indicate fractions that were resolved on SDS-PAGE gels and visualized by Coomassie staining.

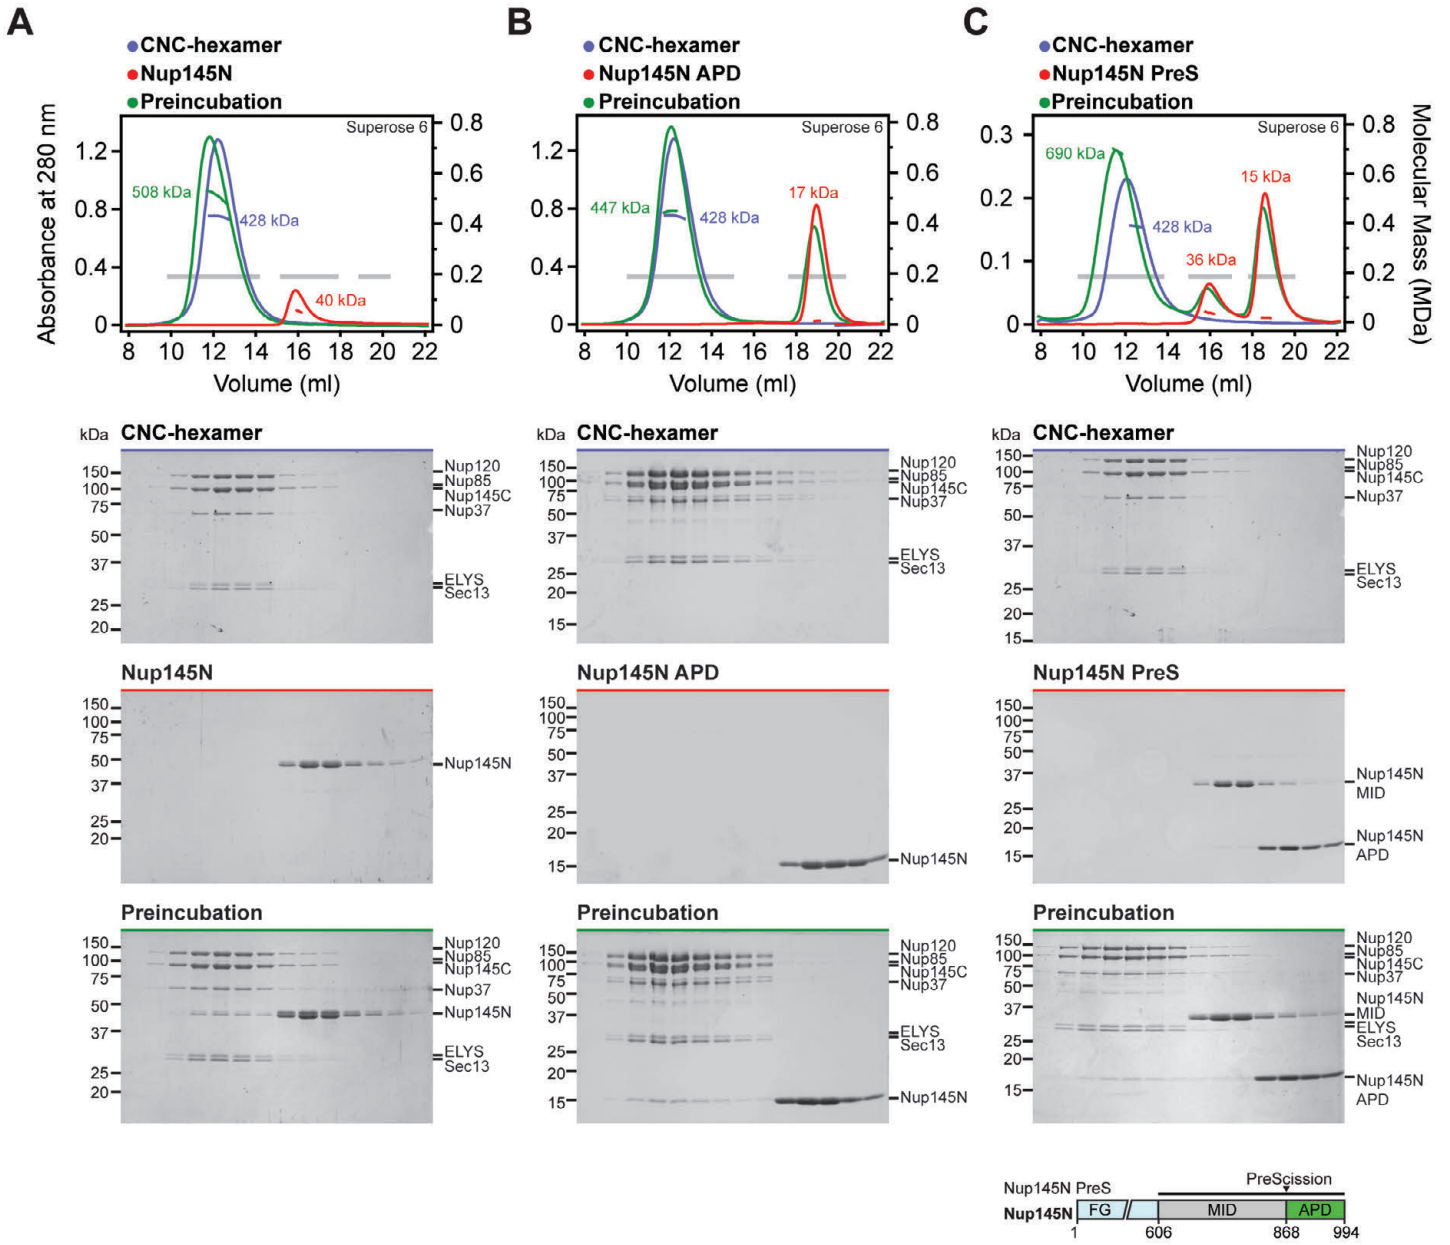

**Fig. S5.**

**The CNC-hexamer interacts with Nup145N<sup>APD</sup>.** SEC-MALS and SDS-PAGE analysis of the CNC-hexamer interaction with (A) Nup145N, (B) Nup145N<sup>APD</sup>, and (C) Nup145N PreS preincubated with PreScission protease. SEC-MALS profiles of nucleoporins or nucleoporin complexes are shown individually (blue and red) and after their preincubation (green). All SEC profiles were obtained using a Superose 6 10/300 GL column. Measured molecular masses are indicated for the peak fractions. Gray bars indicate fractions that were resolved on SDS-PAGE gels and visualized by Coomassie staining. As reference, the domain structure of Nup145N PreS is shown, indicating the construct boundaries and PreScission cleavage site with a black bar and a black triangle, respectively. After cleavage with PreScission protease, Nup145N<sup>APD</sup> co-elutes with the CNC-hexamer, whereas Nup145N<sup>MID</sup> does not incorporate into the complex.

**A**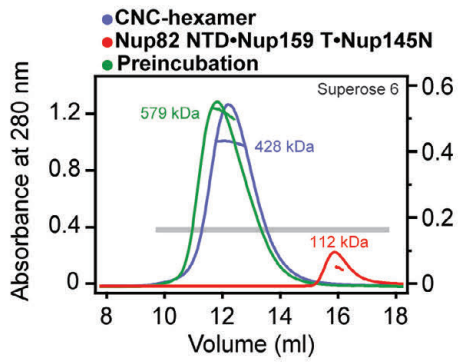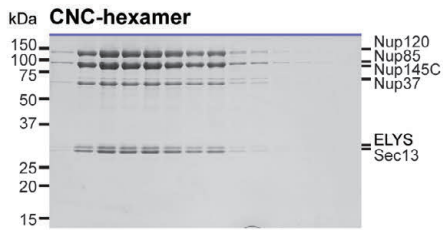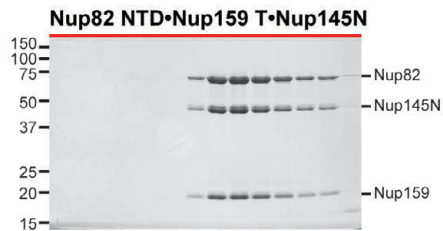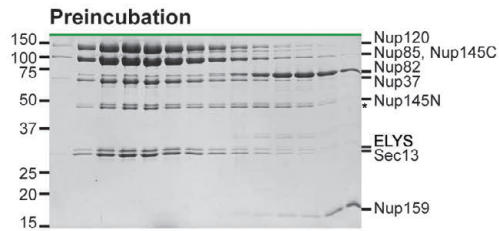**B**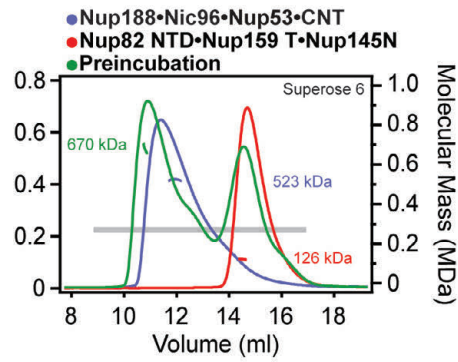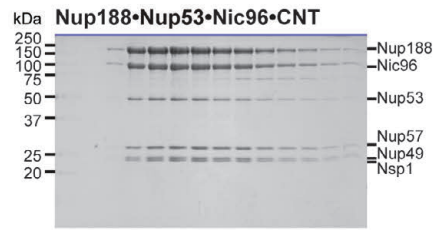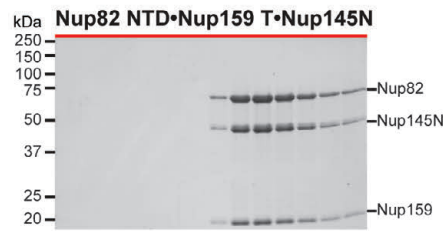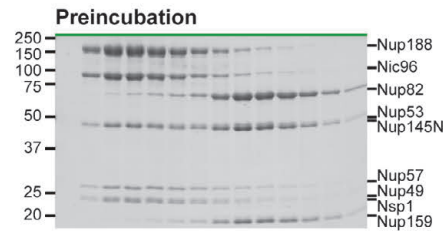

**Fig. S6.**

**Incorporation of Nup145N into complexes with CNC-hexamer or Nup188•Nic96•Nup53•CNT is exclusive of Nup145N binding to Nup82<sup>NTD</sup>•Nup159<sup>T</sup>.** SEC-MALS and SDS-PAGE analysis of the CFC interaction with (A) the CNC-hexamer or (B) the Nup188•Nic96•Nup53•CNT complex. SEC-MALS profiles of nucleoporin complexes are shown individually (blue and red) and after their preincubation (green). SEC profiles were obtained using a Superose 6 10/300 GL column. Measured molecular masses are indicated for the peak fractions. Gray bars indicate fractions that were resolved on SDS-PAGE gels and visualized by Coomassie staining. In both preincubations, Nup145N incorporates stoichiometrically into the complexes, but the Nup82<sup>NTD</sup>•Nup159<sup>T</sup> hetero-dimer does not. However, Nup82<sup>NTD</sup>•Nup159<sup>T</sup> interacts weakly with the Nup188-containing complex.

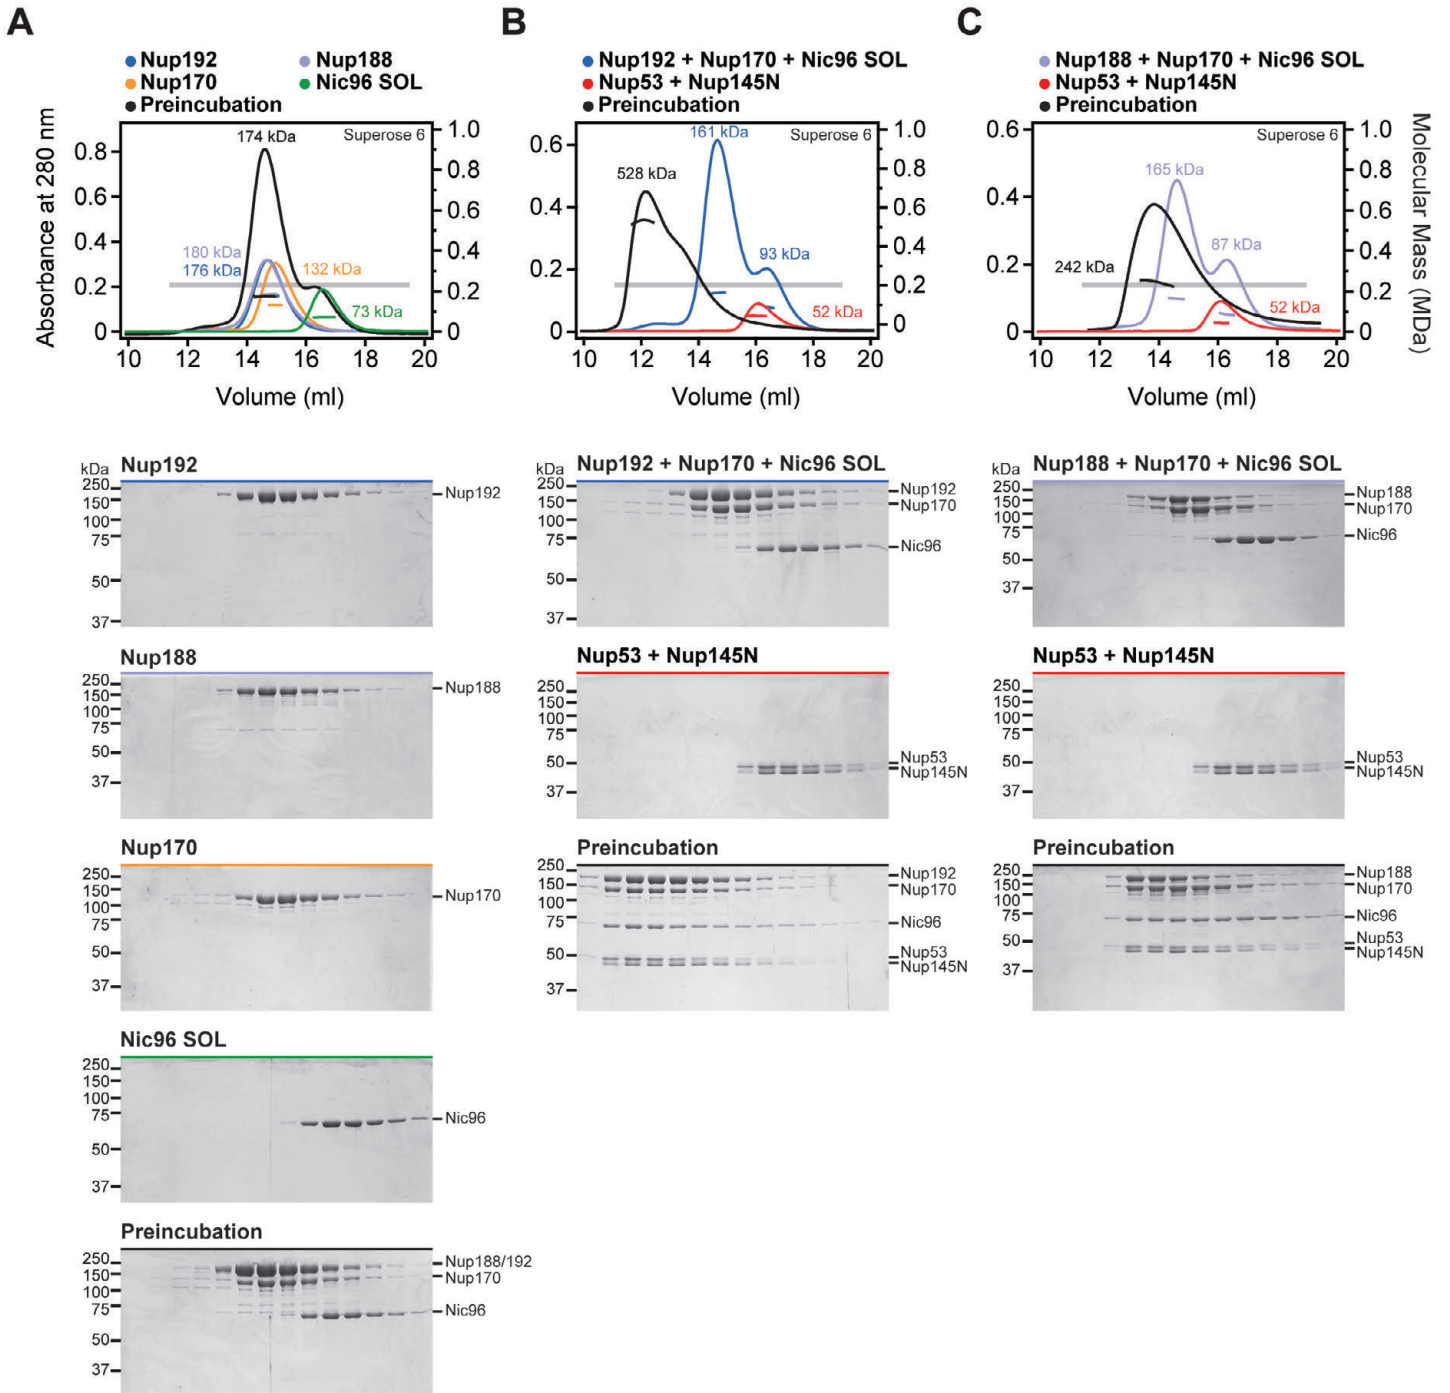

**Fig. S7.**

**Scaffold nucleoporins are assembled by the linker nucleoporins.** SEC-MALS and SDS-PAGE analysis corresponding to Fig. 2, A to C. **(A)** For interaction analysis between scaffold nucleoporins, SEC-MALS profiles of nucleoporins are shown individually (blue, purple, orange, or green) and after their preincubation (black). **(B)** To analyze the assembly of Nup192, Nup170, and Nic96<sup>SOL</sup> with the linker nucleoporins Nup53 and Nup145N, SEC-MALS profiles of the scaffold mixture (blue), the linker mixture (red), or after their preincubation (black) are shown. **(C)** To analyze the assembly of Nup188, Nup170 and Nic96<sup>SOL</sup> with the linker nucleoporins Nup53 and Nup145N, SEC-MALS profiles of the scaffold mixture (purple), the linker mixture (red), or after their preincubation (black) are shown. All SEC profiles were obtained using a Superose 6 10/300 GL column. Measured molecular masses are indicated for the peak fractions. Gray bars indicate fractions that were resolved on SDS-PAGE gels and visualized by Coomassie staining. Because Nup188 could not be incorporated into the IRC, Nup188 and Nup192 were not simultaneously included in preincubations.



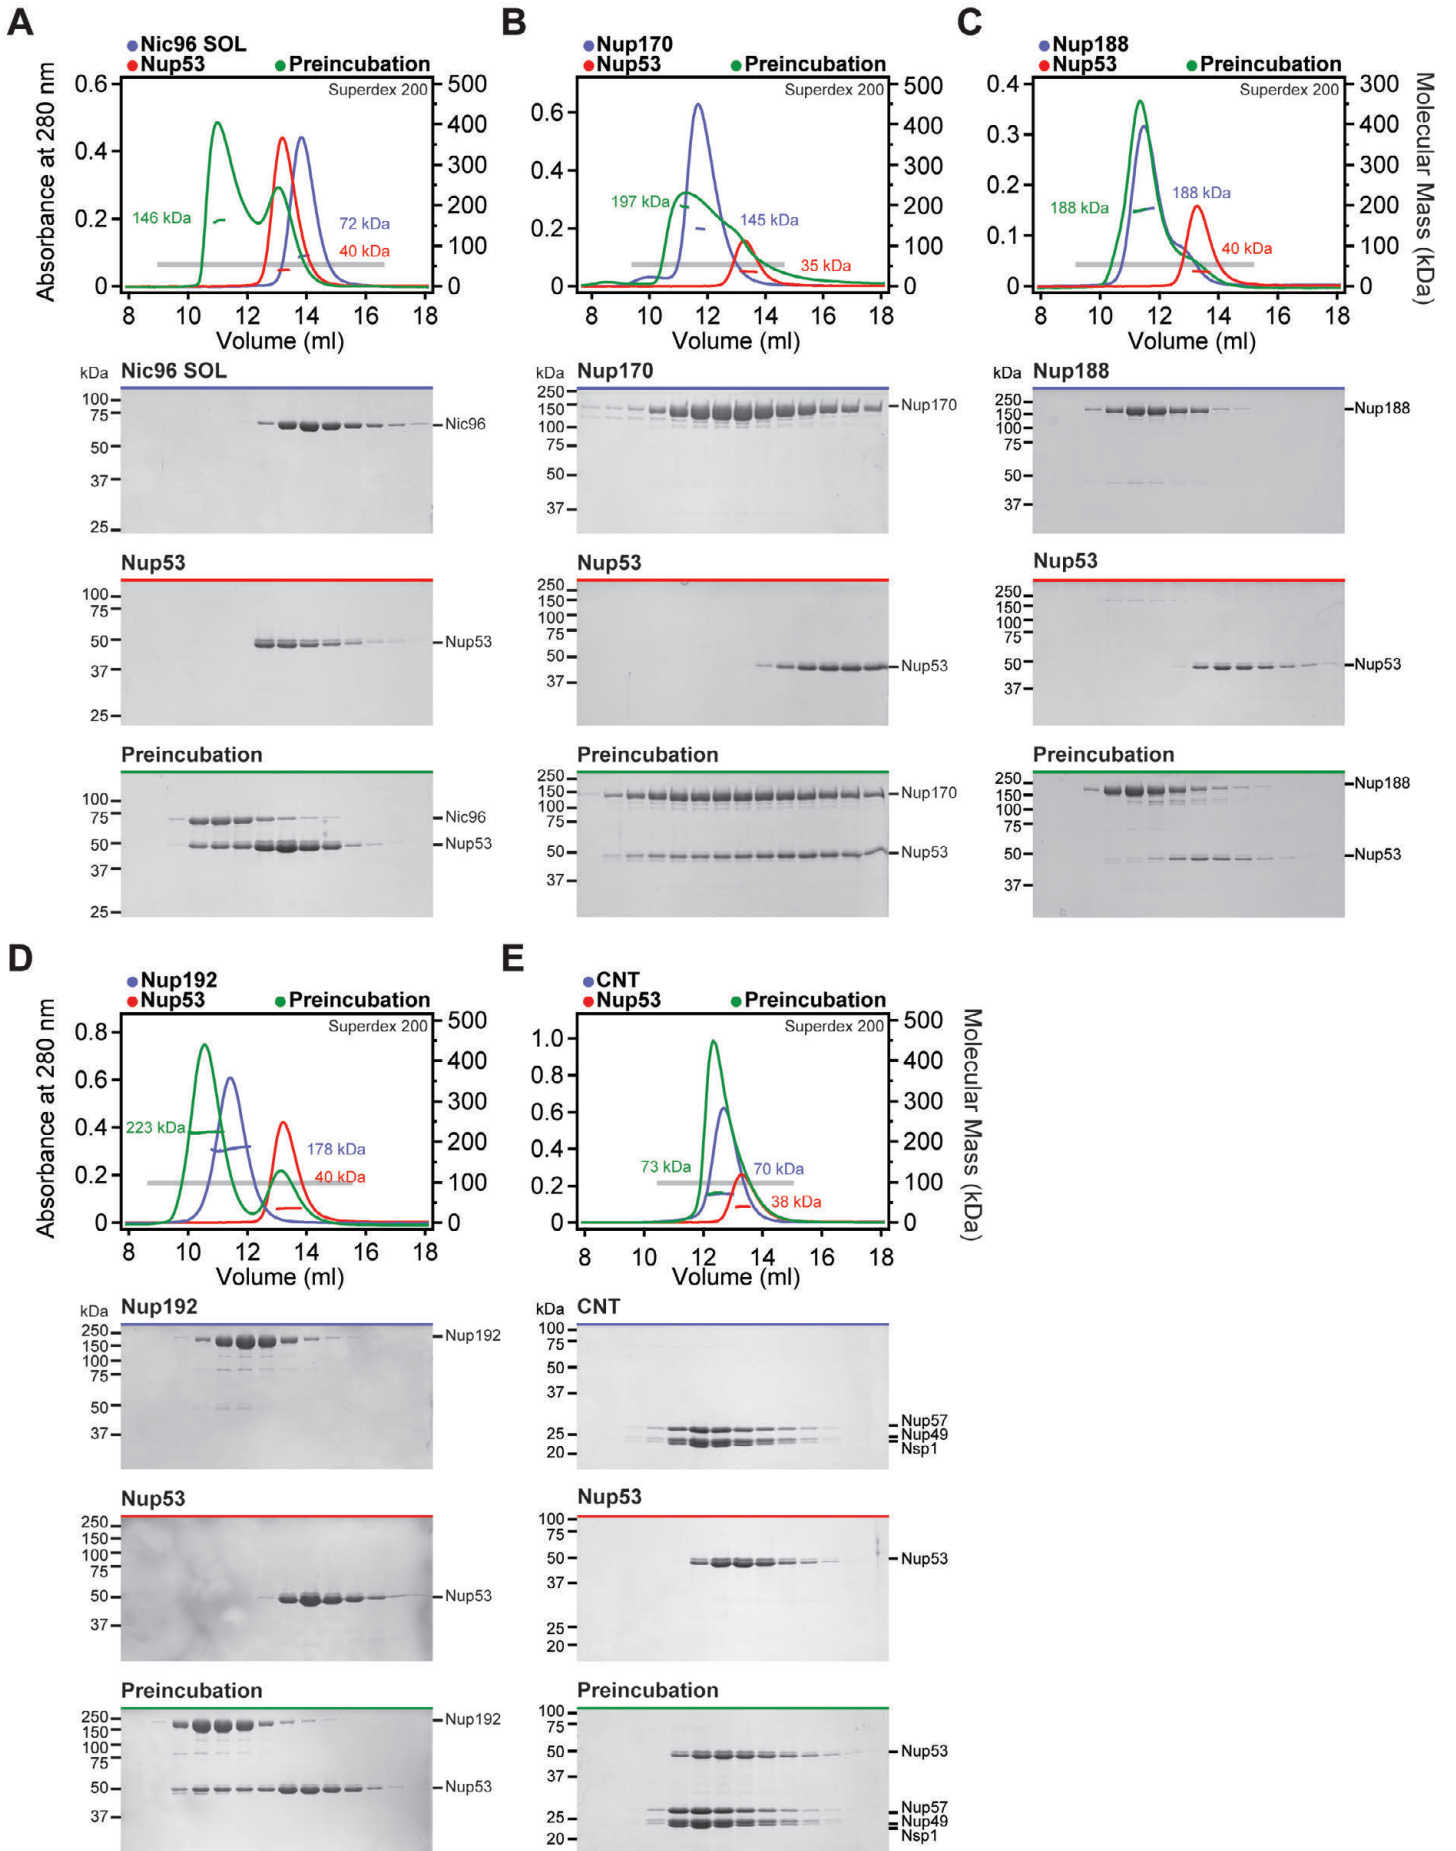

**Fig. S8.**

**Identification of interactions between Nup53 and the scaffold nucleoporins.** (A-E) SEC-MALS and SDS-PAGE analysis for Fig. 2D. SEC-MALS profiles of nucleoporins are shown individually (blue and red) and after their preincubation (green). All SEC profiles were obtained using a Superdex 200 10/300 GL column. Measured molecular masses are indicated for the peak fractions. Gray bars indicate fractions that were resolved on SDS-PAGE gels and visualized by Coomassie staining. Robust complex formation with Nup53 was observed for Nic96<sup>SOL</sup>, Nup170, and Nup192. Interactions of Nup53 with Nup188 and the CNT were only barely detectable.

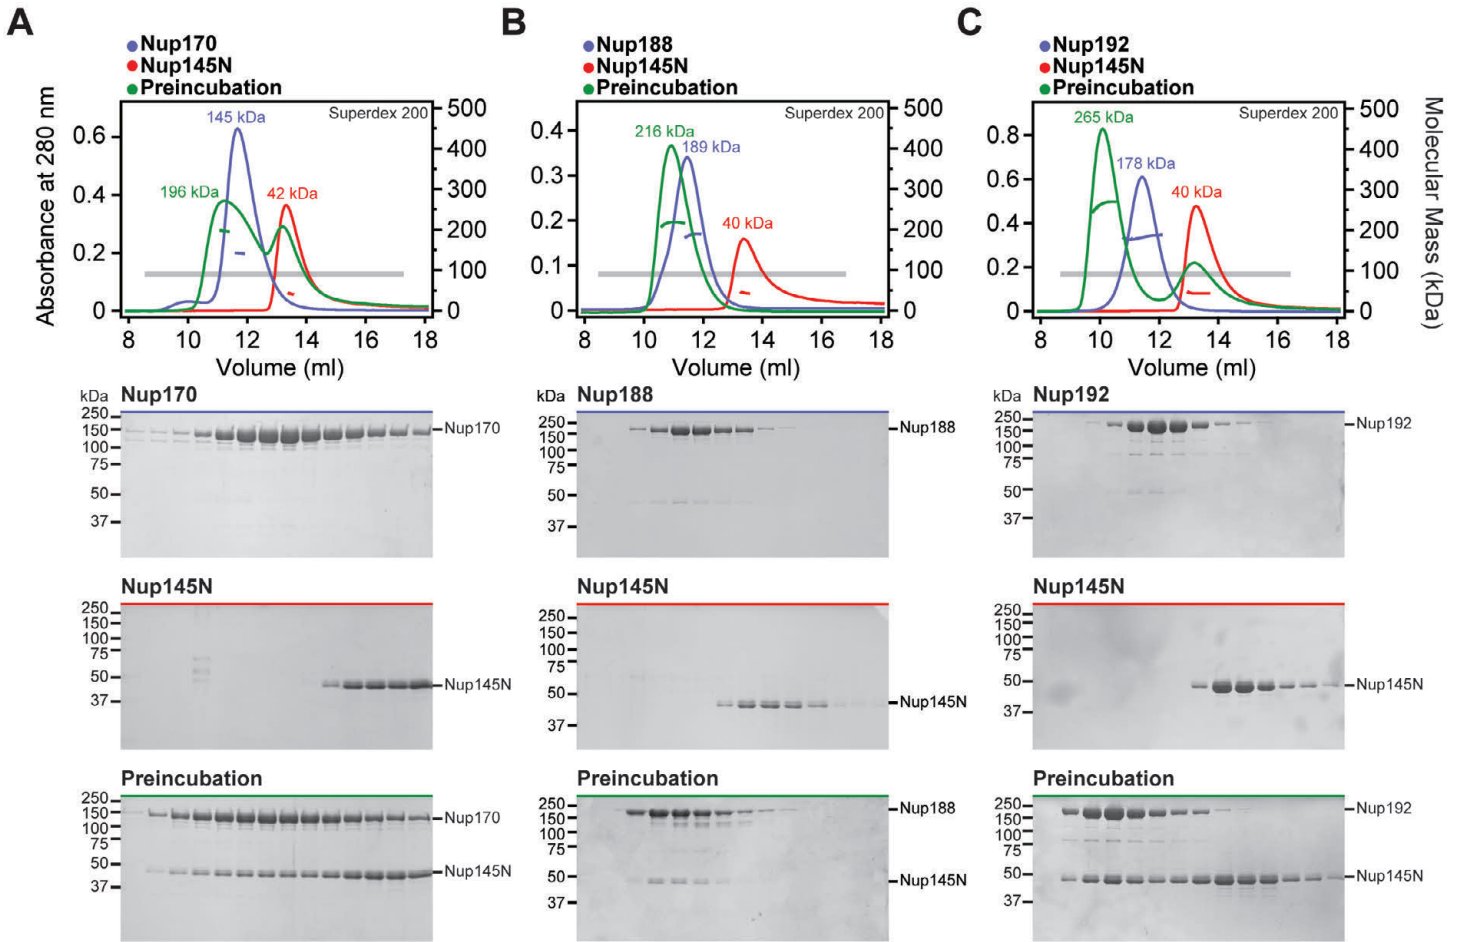

**Fig. S9.**

**Identification of interactions between Nup145N and scaffold nucleoporins.** (A-C) SEC-MALS and SDS-PAGE analysis for Fig. 2E. SEC-MALS profiles of nucleoporins are shown individually (blue and red) and after their preincubation (green). All SEC profiles were obtained using a Superdex 200 10/300 GL column. Measured molecular masses are indicated for the peak fractions. Gray bars indicate fractions that were resolved on SDS-PAGE gels and visualized by Coomassie staining. Robust complex formation with Nup145N was observed for Nup170, Nup188, and Nup192. We previously demonstrated interactions between Nup145N and Nic96 and the CNT (15).

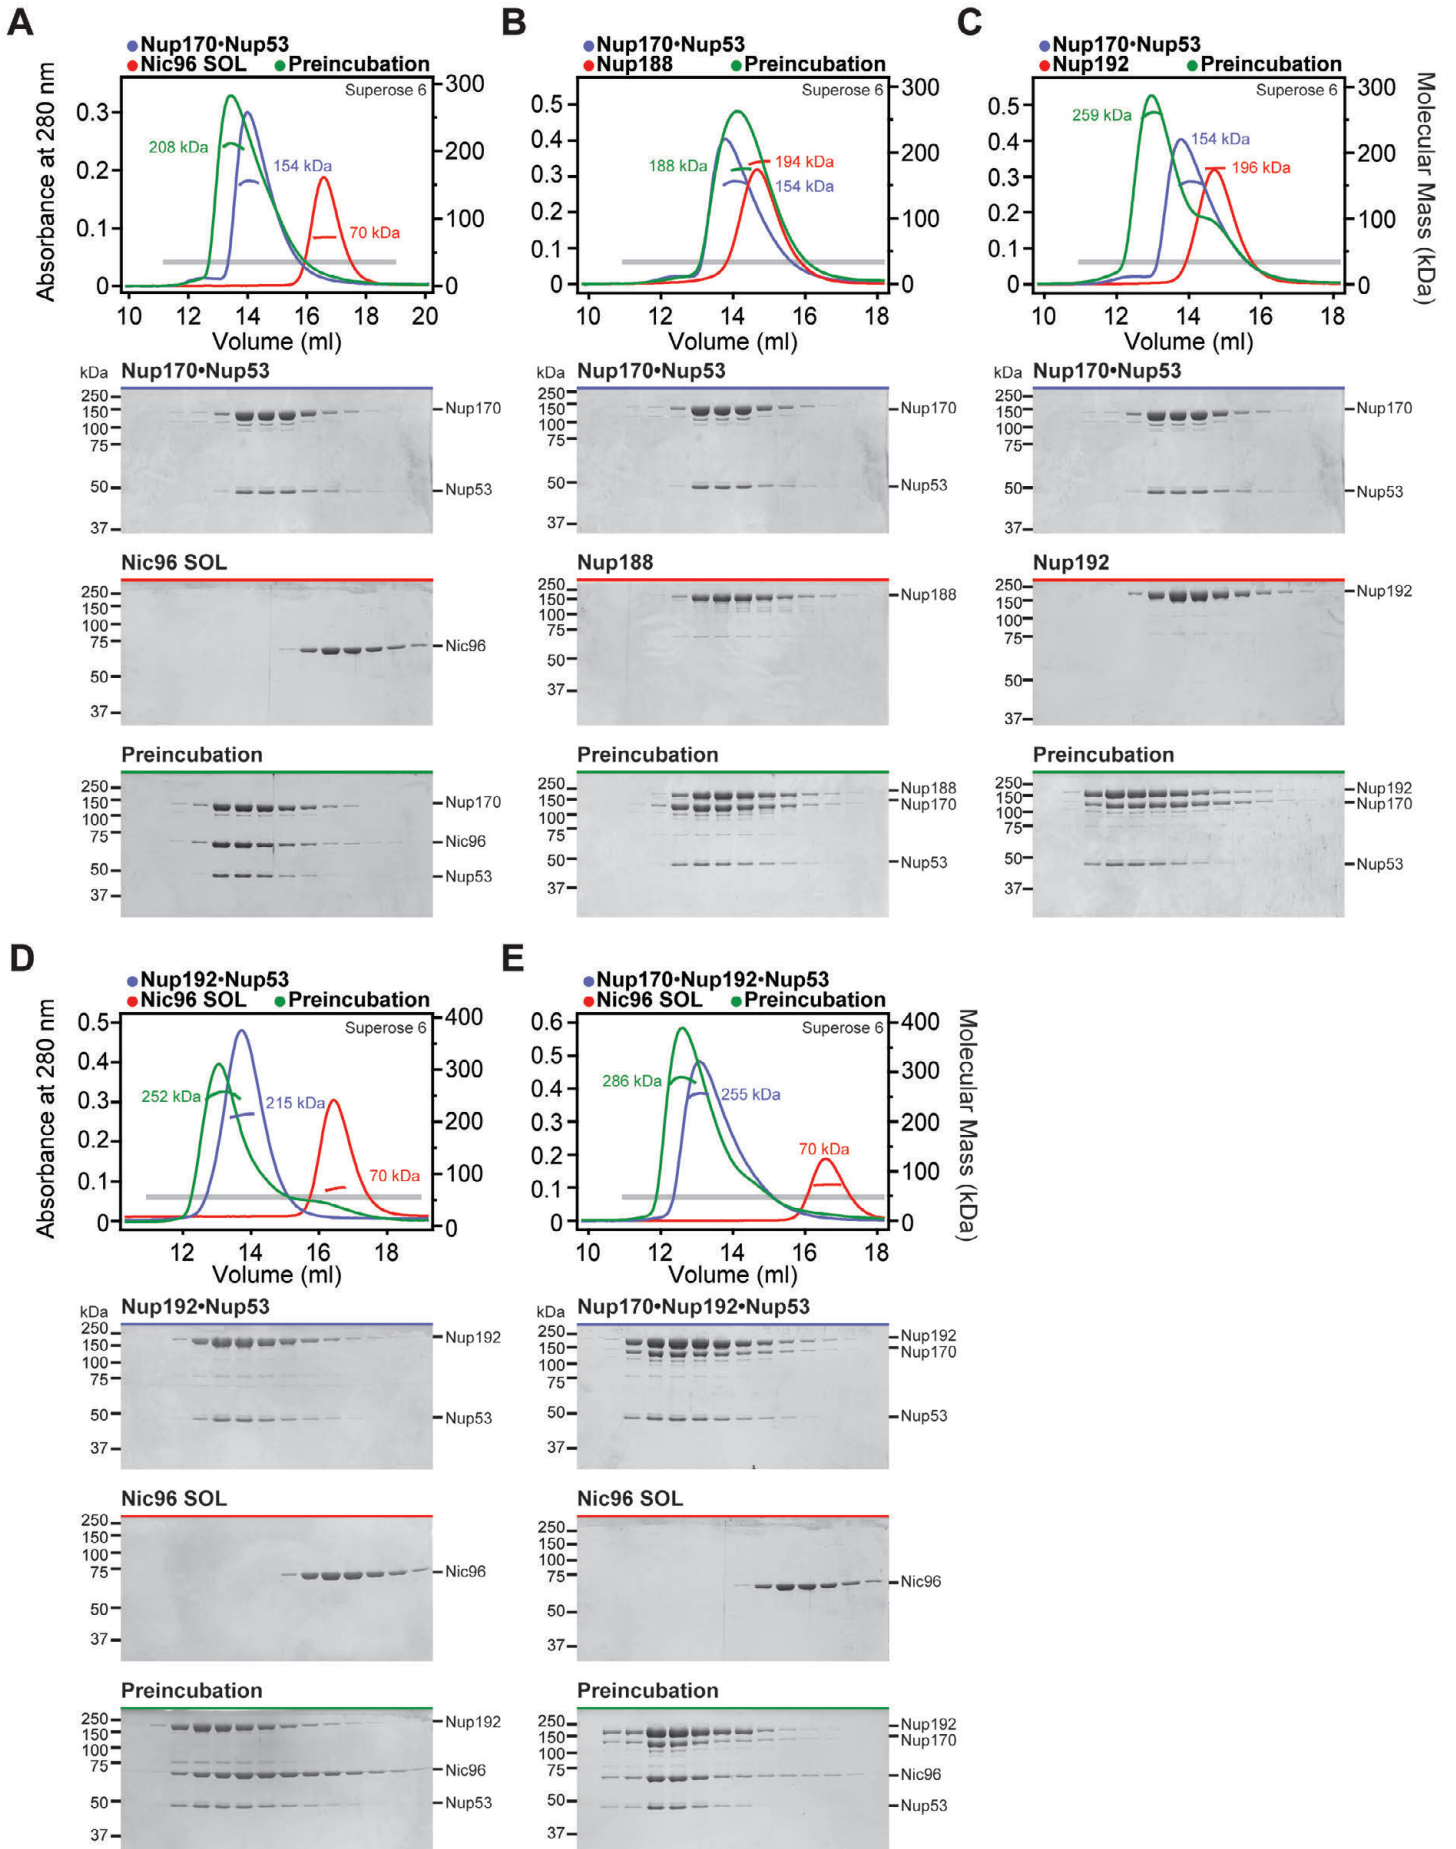

**Fig. S10.**

**Identification of hetero-trimeric complexes assembled by Nup53.** (A-E) SEC-MALS and SDS-PAGE analysis corresponding to Fig. 2D. Purified hetero-dimeric Nup53 complexes were tested for their ability to form hetero-trimers with an additional scaffold nucleoporin. SEC-MALS profiles of nucleoporins or nucleoporin complexes are shown individually (blue and red) and after their preincubation (green). All SEC profiles were obtained using a Superose 6 10/300 GL column. Measured molecular masses are indicated for the peak fractions. Gray bars indicate fractions that were resolved on SDS-PAGE gels and visualized by Coomassie staining. Nup53 is able to bind simultaneously to Nup170, Nic96<sup>SOL</sup>, and Nup192. The interaction of the Nup170•Nup53 hetero-dimer with Nup188 was only barely detectable.

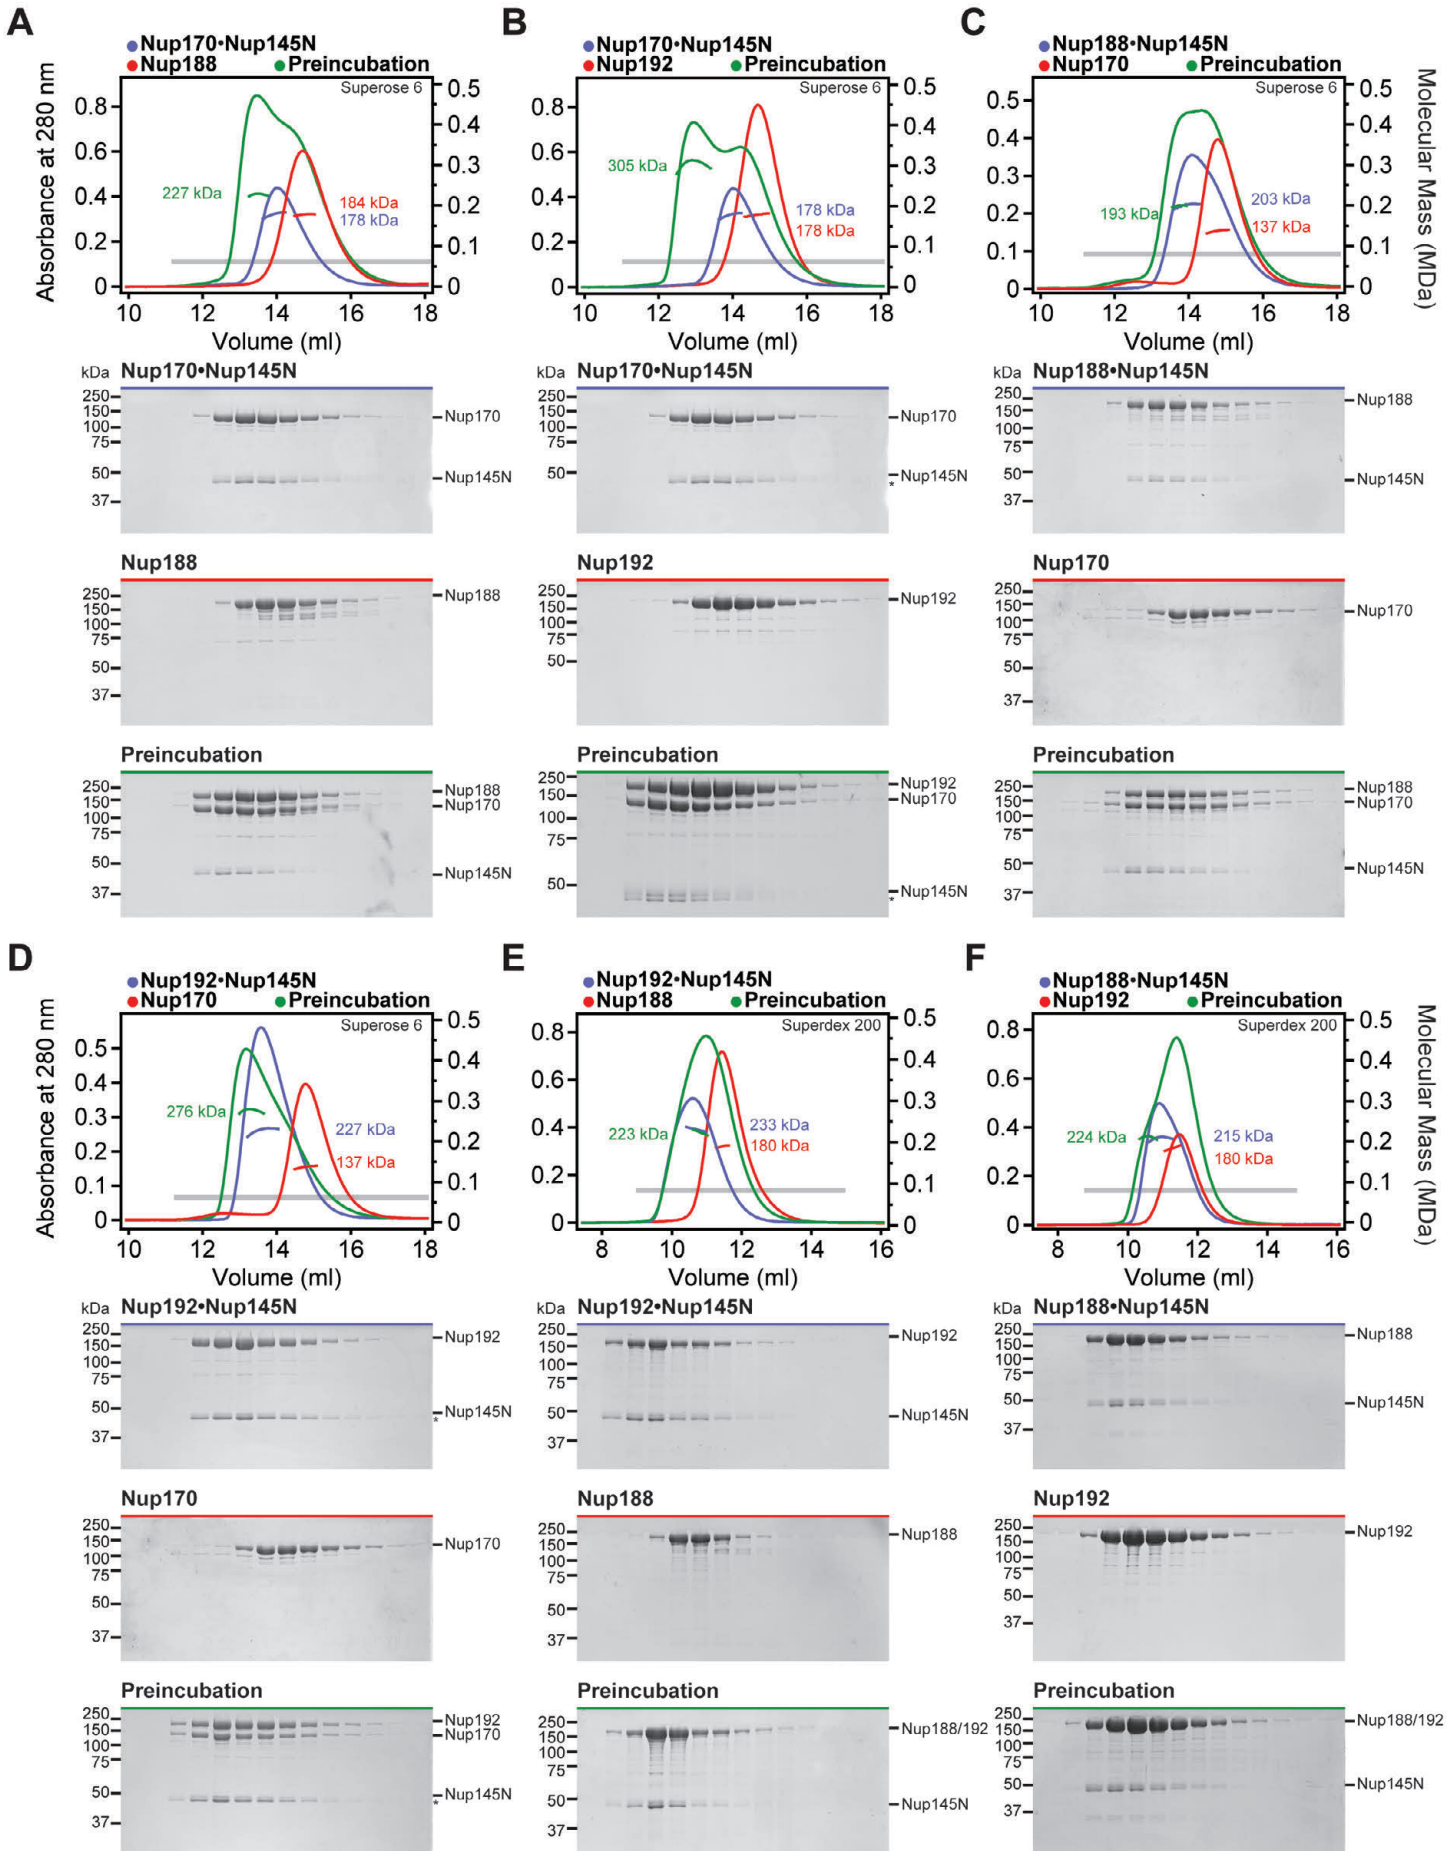

**G**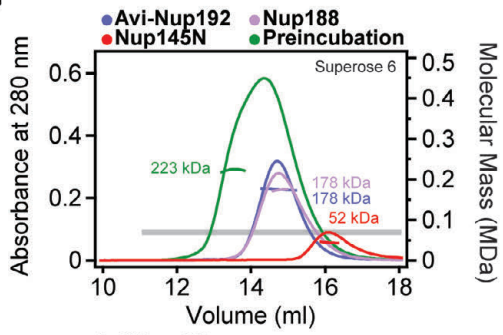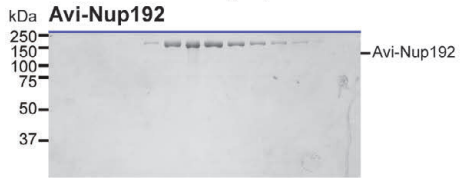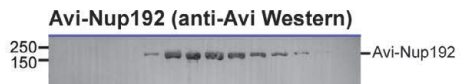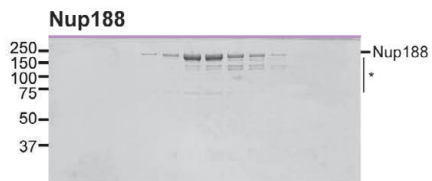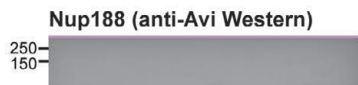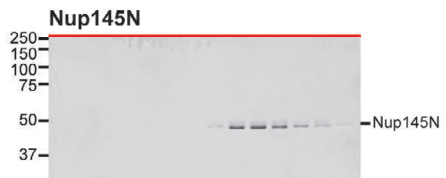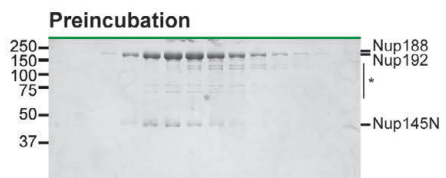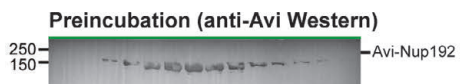



**Fig. S11.**

**Identification of hetero-trimeric complexes assembled by Nup145N.** (A-G) SEC-MALS and SDS-PAGE analysis corresponding to Fig. 2E. Purified hetero-dimeric Nup145N complexes were tested for their ability to form hetero-trimers with an additional scaffold nucleoporin. SEC-MALS profiles of nucleoporins or nucleoporin complexes are shown individually (blue, red, and purple) and after their preincubation (green). SEC profiles were obtained using either a Superose 6 10/300 GL column or a Superdex 200 10/300 GL column as indicated. Measured molecular masses are indicated for the peak fractions. Gray bars indicate fractions that were resolved on SDS-PAGE gels and visualized by Coomassie staining or by western blot analysis with a mouse anti-AviTag antibody. Hetero-trimeric complex formation was determined on the basis of a shift in elution volume, an increase in measured molecular mass, and the presence of all three proteins in the higher molecular mass fractions. For preincubations with Nup188 or Nup188•Nup145N, only minor shifts in elution volume and no increases in the measured molecular masses were observed, indicating the formation of a mixture of species rather than stable hetero-trimeric complexes as seen between Nup170, Nup192, and Nup145N. As Nup188 and Nup192 cannot be distinguished by SDS-PAGE, western blot analysis was employed to confirm that Nup188 and Nup192 bind to Nup145N in a mutually exclusive fashion.

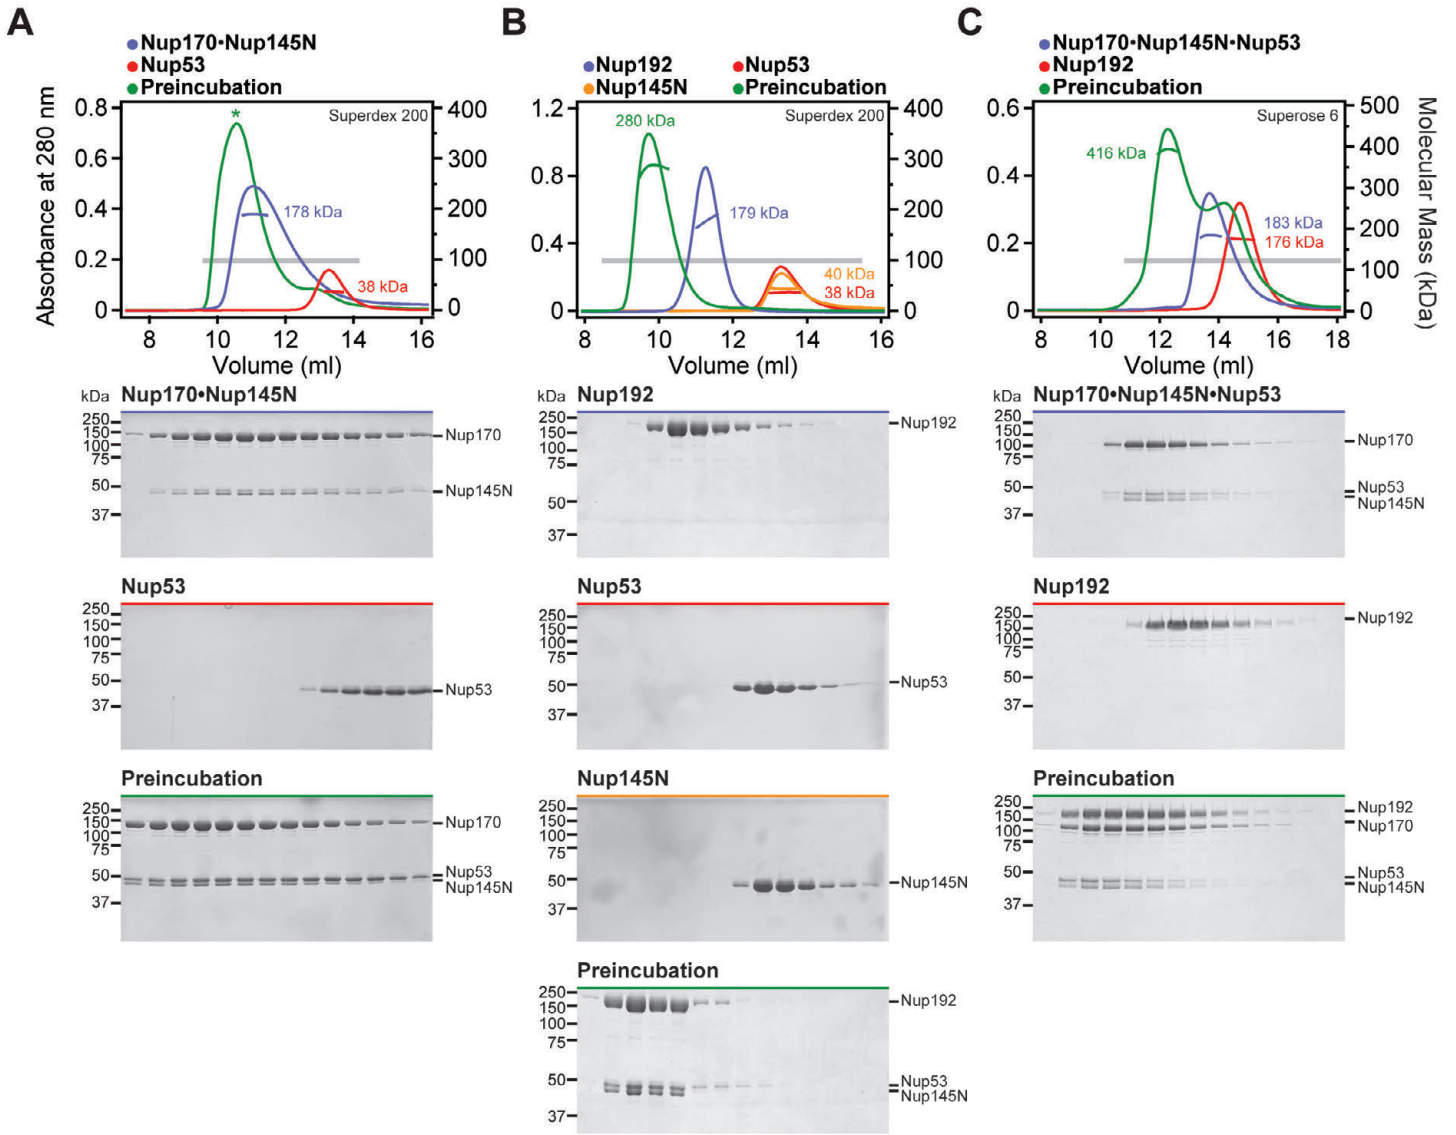

**Fig. S12.**

**Binding sites for linker nucleoporins on Nup170 and Nup192 are distinct and compatible. (A-C)** SEC-MALS profiles of nucleoporins or nucleoporin complexes are shown individually (blue, red, or yellow) and after their preincubation (green). SEC profiles were obtained using a Superdex 200 10/300 GL column for panels (A, B) and a Superose 6 10/300 GL column for panel (C). Measured molecular masses are indicated for the peak fractions. Gray bars indicate fractions that were resolved on SDS-PAGE gels and visualized by Coomassie staining. We were unable to obtain an accurate molecular mass measurement for the preincubation of Nup53 with Nup170•Nup145N, as indicated by an asterisk above the chromatogram.

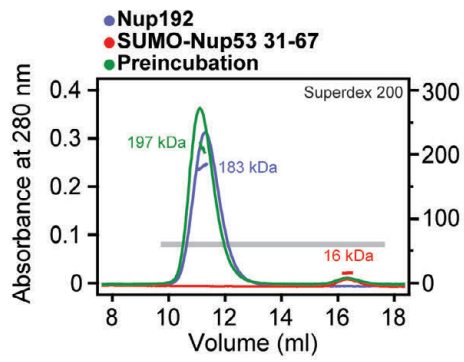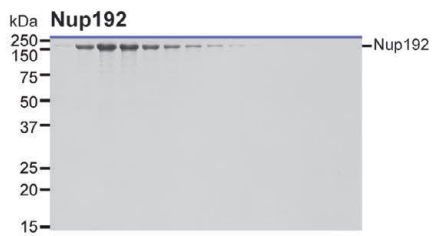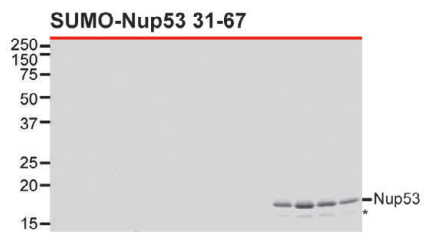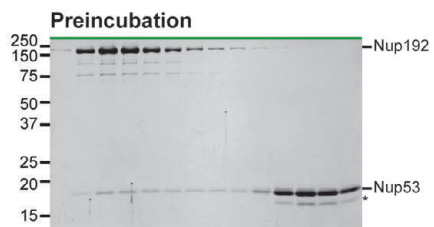

**Fig. S13.**

**Nup192 recognizes Nup53<sup>31-67</sup>.** SEC-MALS and SDS-PAGE analysis corresponding to [Fig. 2F](#). SEC-MALS profiles of nucleoporins are shown individually (blue and red) and after their preincubation (green). All SEC profiles were obtained using a Superdex 200 10/300 GL column. Measured molecular masses are indicated for the peak fractions. Gray bars indicate fractions that were resolved on SDS-PAGE gels and visualized by Coomassie staining.

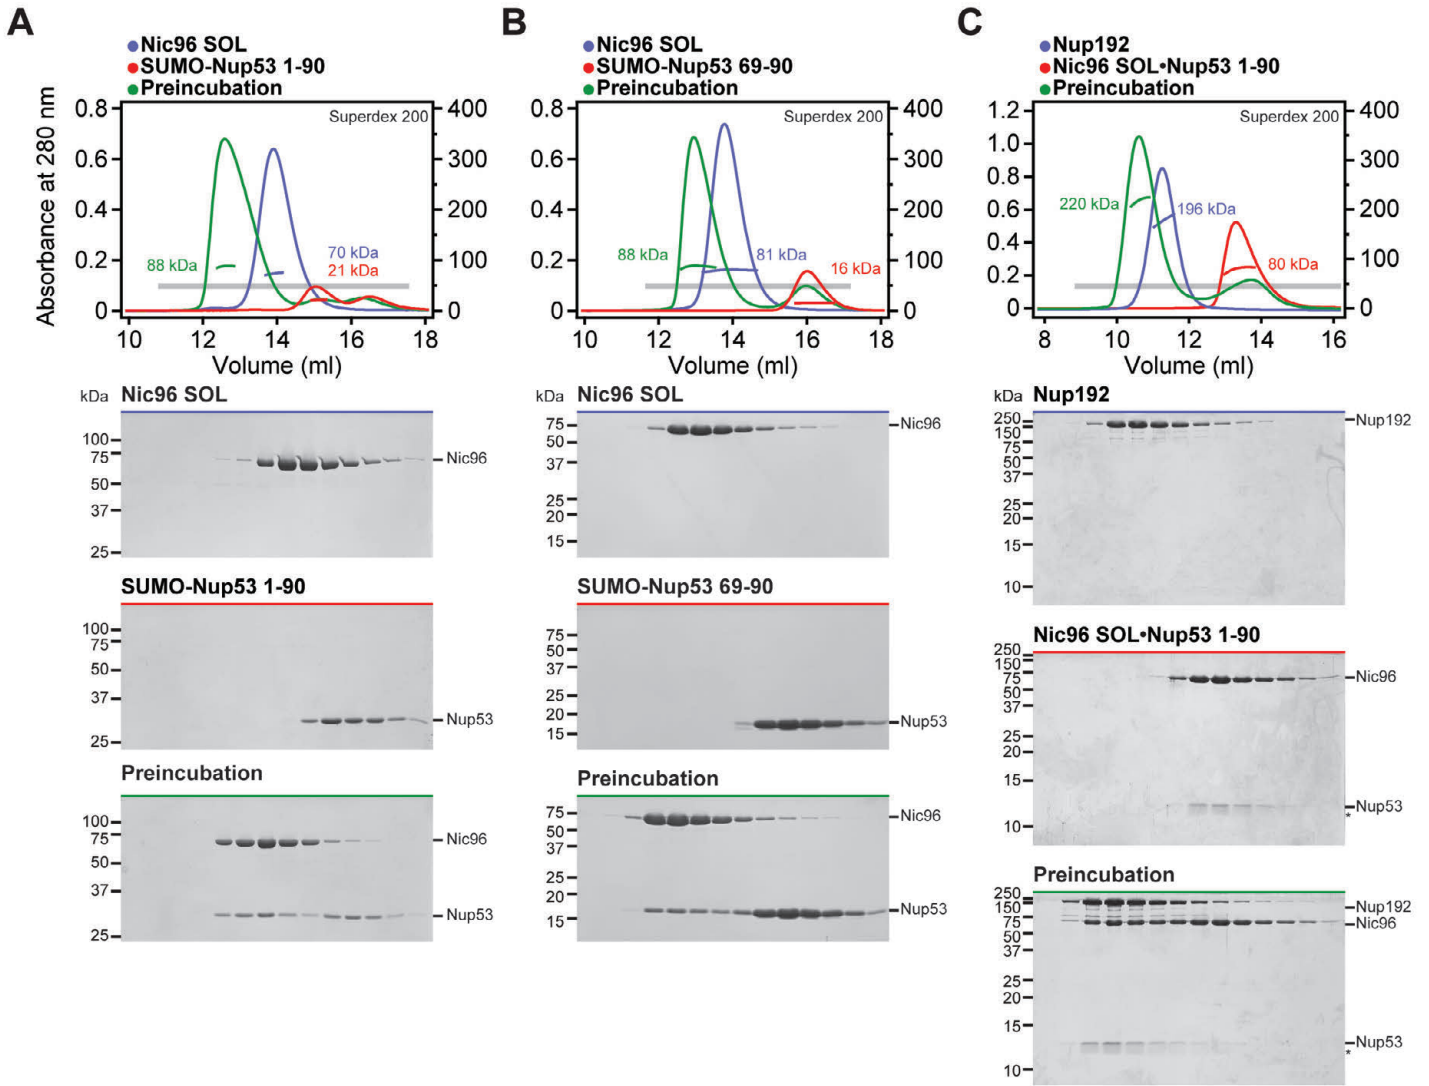

**Fig. S14.**

**Nic96<sup>SOL</sup> recognizes Nup53<sup>69-90</sup> and Nup53<sup>1-90</sup> binds simultaneously to Nup192 and Nic96<sup>SOL</sup>.** (A-C) SEC-MALS and SDS-PAGE analysis corresponding to Fig. 2F. SEC-MALS profiles of nucleoporins or nucleoporin complexes are shown individually (blue and red) and after their preincubation (green). All SEC profiles were obtained using a Superdex 200 10/300 GL column. Measured molecular masses are indicated for the peak fractions. Gray bars indicate fractions that were resolved on SDS-PAGE gels and visualized by Coomassie staining. The Nup53 binding sites for Nic96<sup>SOL</sup> and Nup192 map to directly adjacent sequence fragments and are not mutually exclusive.

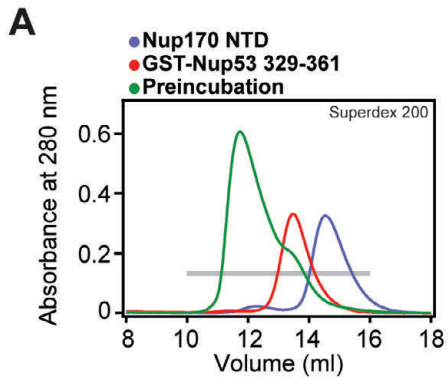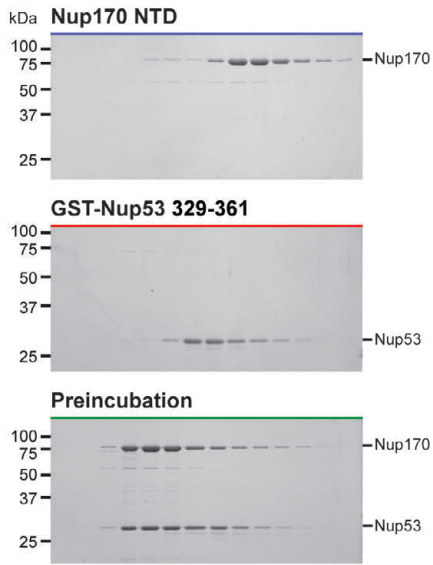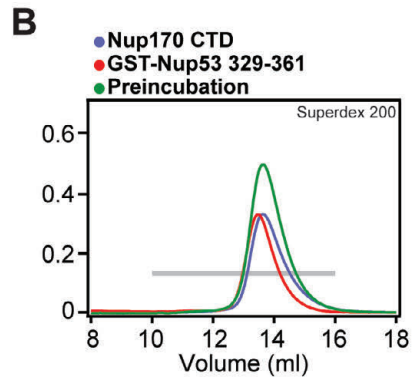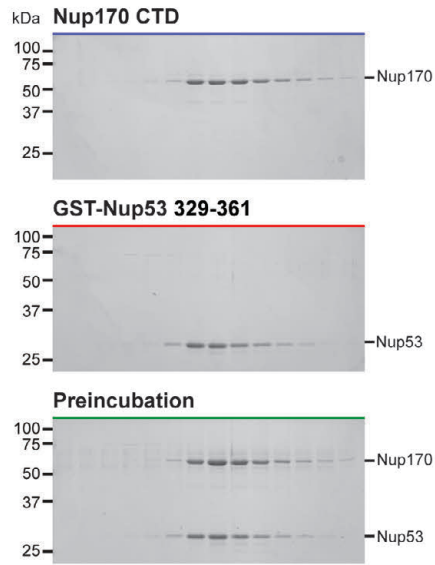



**Fig. S15.**

**Nup170<sup>NTD</sup> recognizes Nup53<sup>329-361</sup>.** (A, B) SEC and SDS-PAGE analysis corresponding to [Fig. 2F](#). SEC profiles of nucleoporins are shown individually (blue and red) and after their preincubation (green). All SEC profiles were obtained using a Superdex 200 10/300 GL column. Gray bars indicate fractions that were resolved on SDS-PAGE gels and visualized by Coomassie staining.

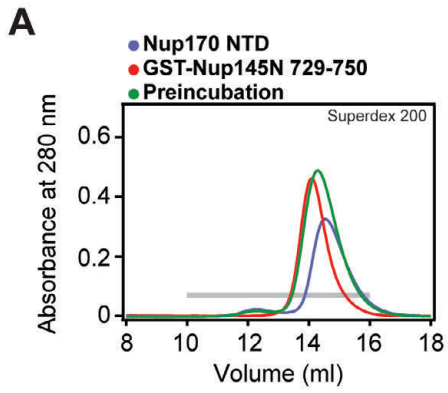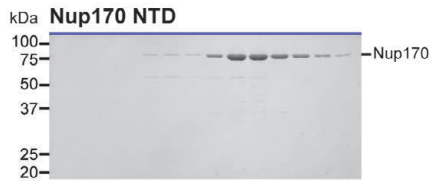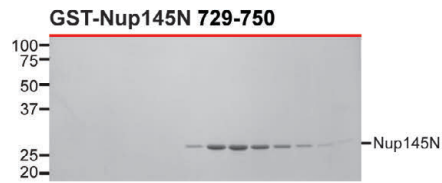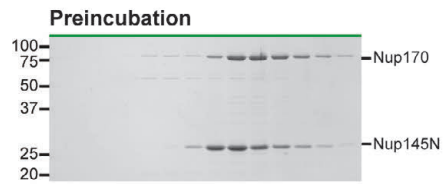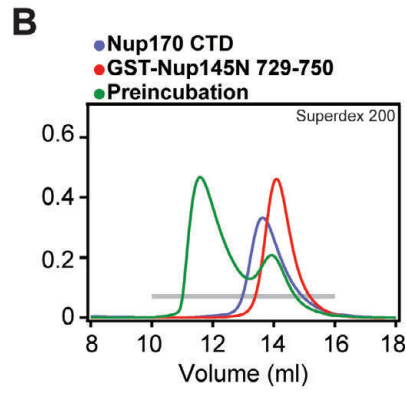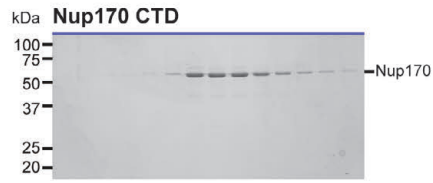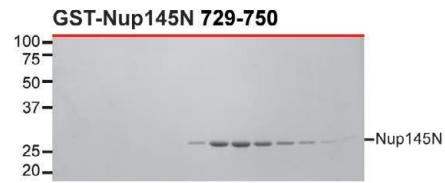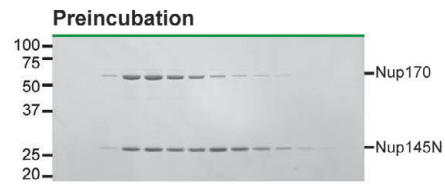

**Fig. S16.**

**Nup170<sup>CTD</sup> recognizes Nup145N<sup>729-750</sup>.** (A, B) SEC and SDS-PAGE analysis corresponding to [Fig. 2F](#). SEC profiles of nucleoporins are shown individually (blue and red) and after their preincubation (green). All SEC profiles were obtained using a Superdex 200 10/300 GL column. Gray bars indicate fractions that were resolved on SDS-PAGE gels and visualized by Coomassie staining.

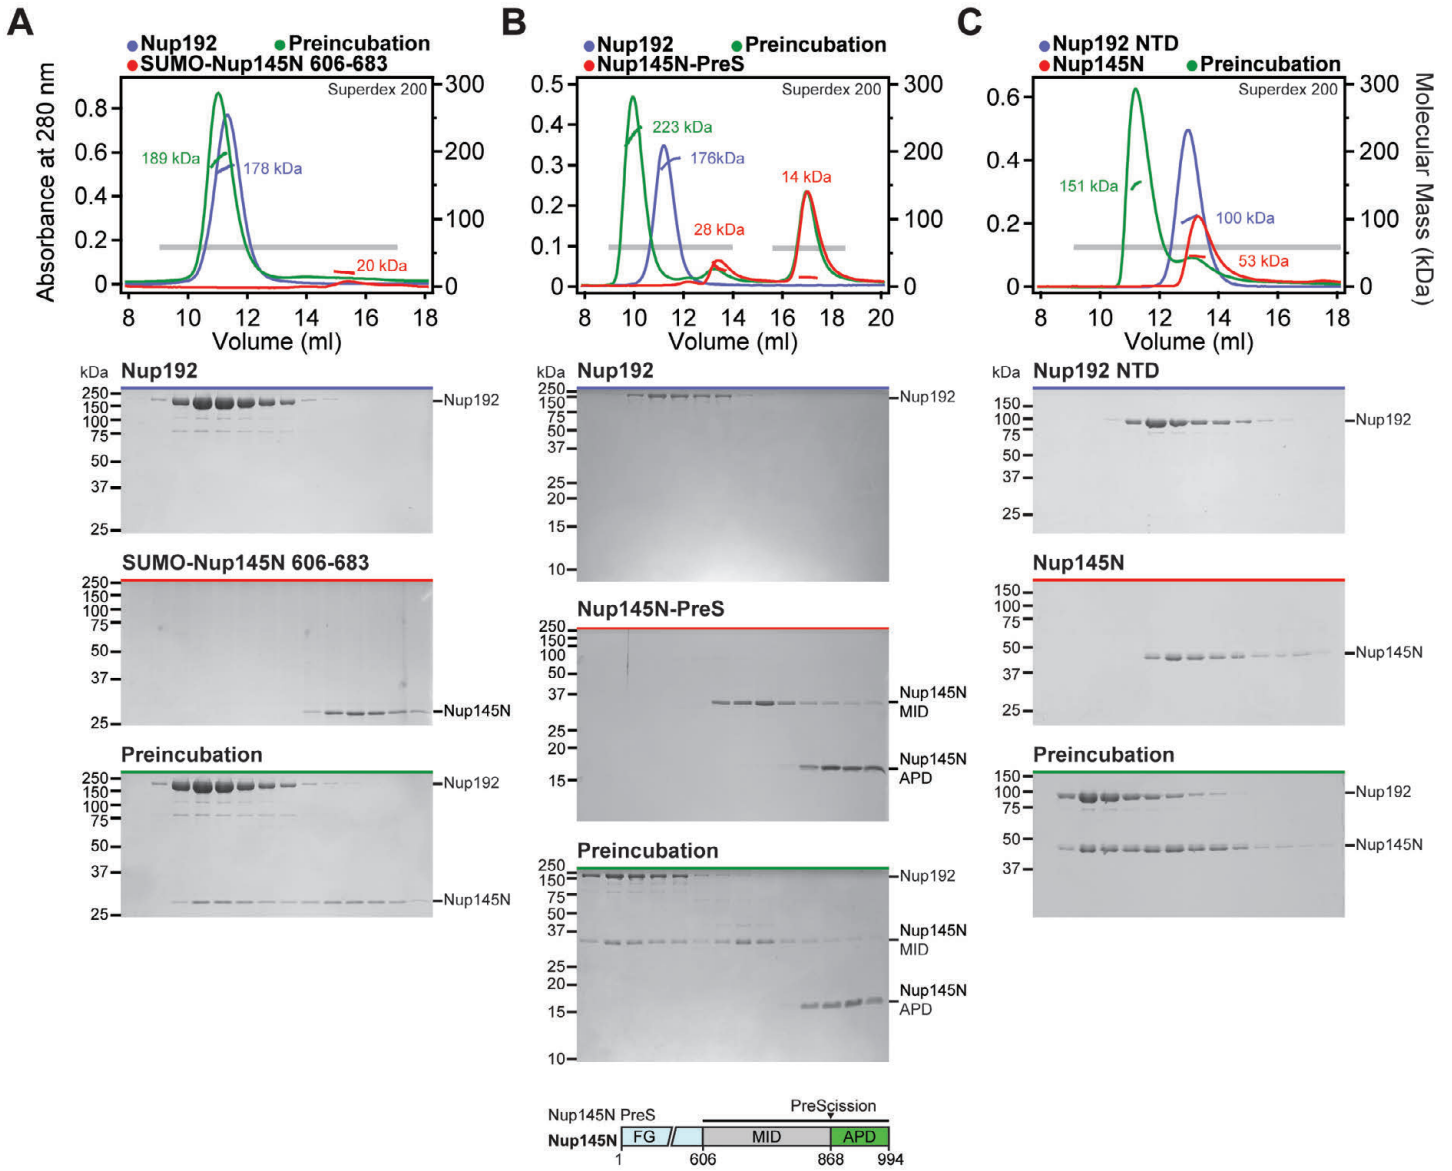

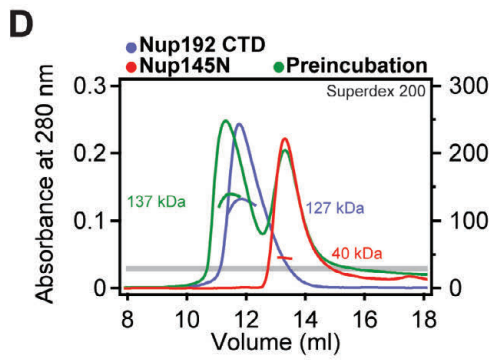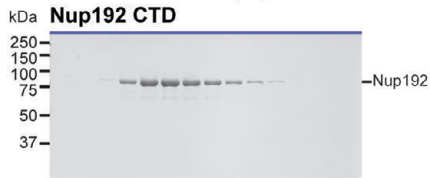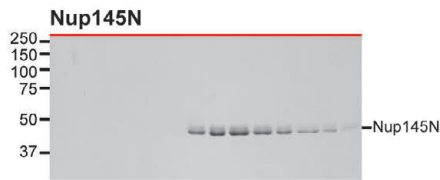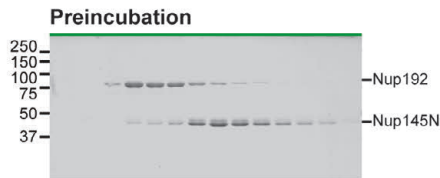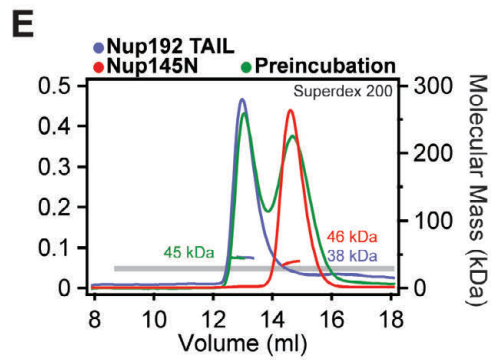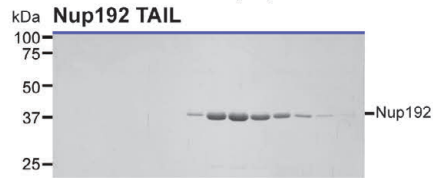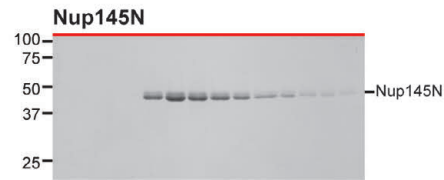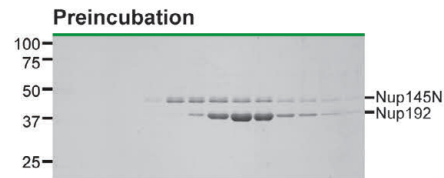

**Fig. S17.**

**Nup192 recognizes Nup145N<sup>606-683</sup> primarily with its NTD.** (A-E) SEC-MALS and SDS-PAGE analysis corresponding to Fig. 2F. SEC-MALS profiles of nucleoporins are shown individually (blue and red) and after their preincubation (green). All SEC profiles were obtained using a Superdex 200 10/300 GL column. Measured molecular masses are indicated for the peak fractions. Gray bars indicate fractions that were resolved on SDS-PAGE gels and visualized by Coomassie staining. Nup192 binds to a minimal sequence on Nup145N between residues 606-683. After cleavage of Nup145N<sup>PreS</sup> with PreScission protease, Nup145N<sup>MID</sup> co-elutes with Nup192, whereas Nup145N<sup>APD</sup> does not interact with Nup192. As a reference, the domain structure of Nup145N<sup>PreS</sup> is shown, indicating the construct boundaries and PreScission cleavage site with a black bar and a black triangle, respectively. Nup145N forms a stoichiometric complex with Nup192<sup>NTD</sup>, but Nup145N binding to Nup192<sup>CTD</sup> and Nup192<sup>TAIL</sup> were barely detectable and undetectable, respectively.

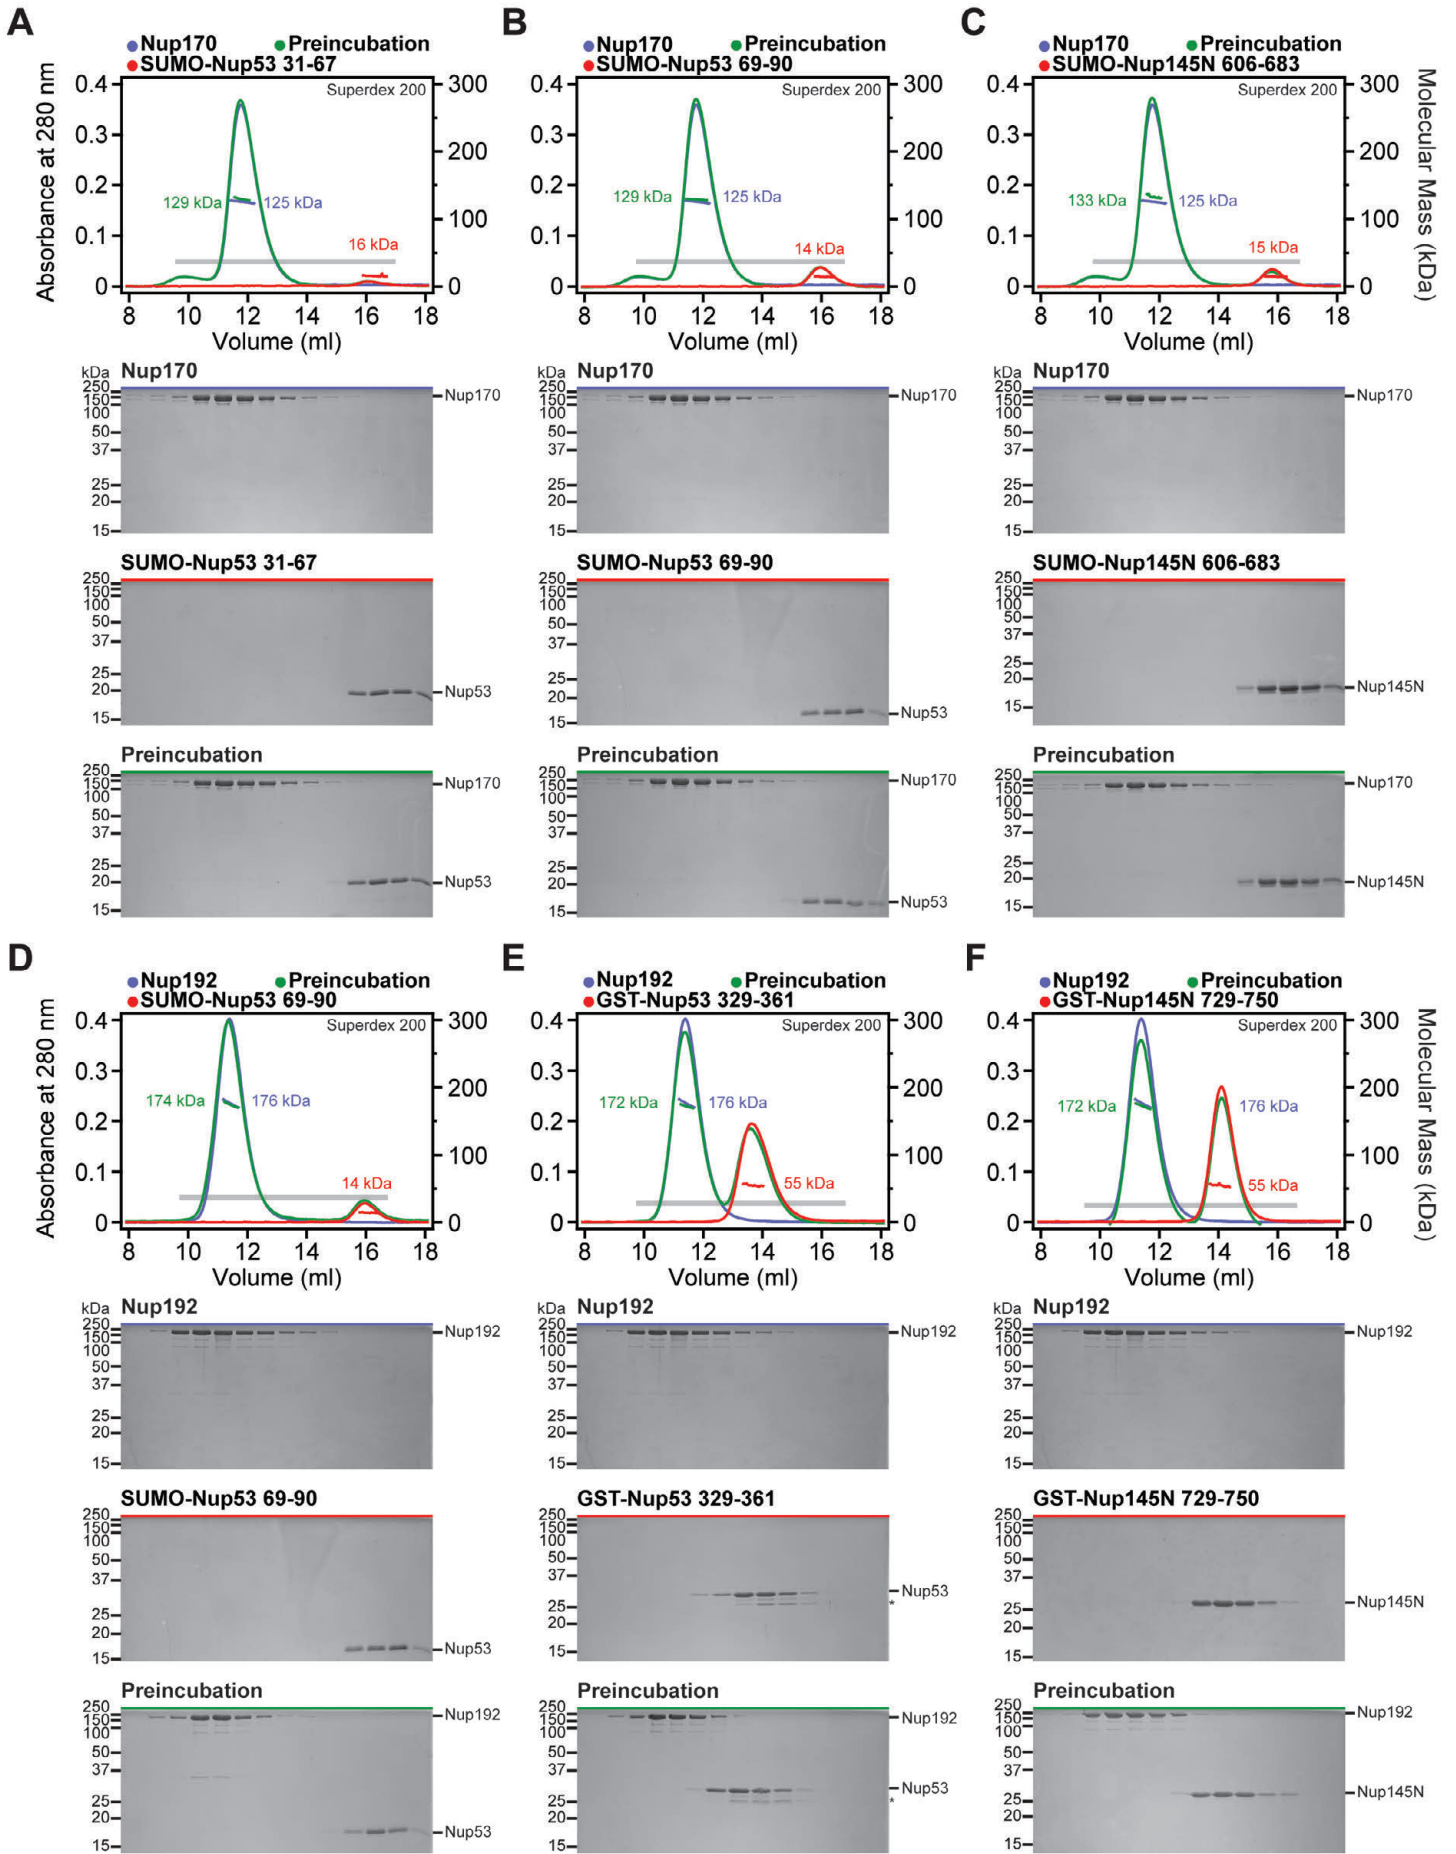

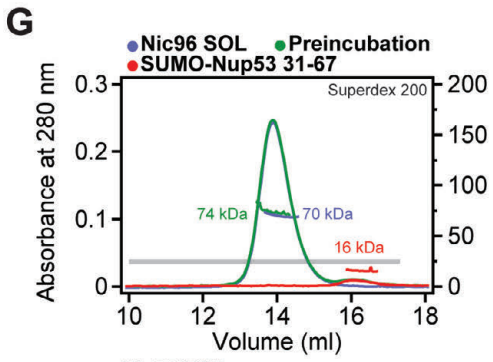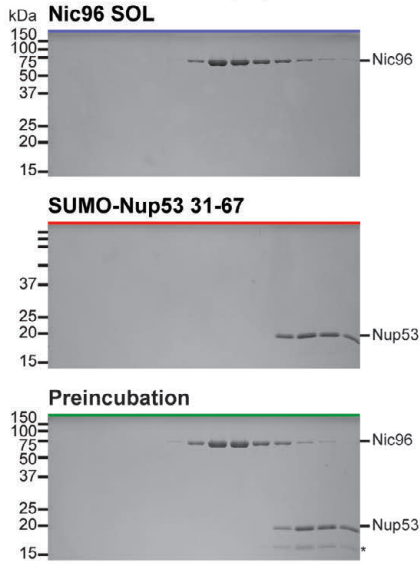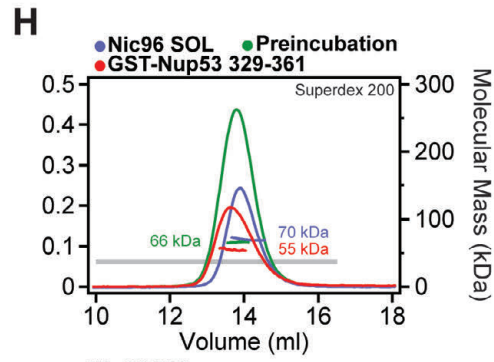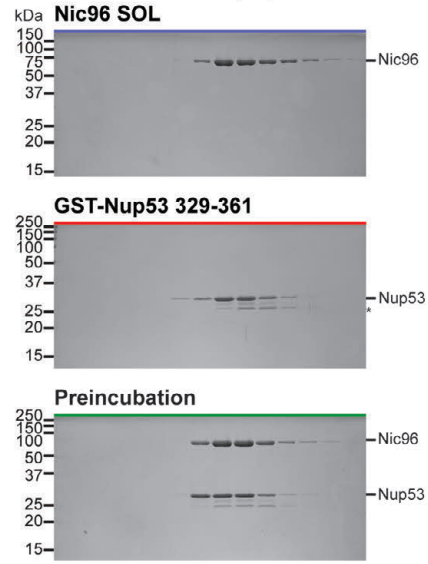



**Fig. S18.**

**Mapped minimal linker nucleoporin fragments are specific for the identified binding partners.** (A-H) SEC-MALS profiles of nucleoporins are shown individually (blue and red) and after their preincubation (green). All SEC profiles were obtained using a Superdex 200 10/300 GL column. Measured molecular masses are indicated for the peak fractions. Gray bars indicate fractions that were resolved on SDS-PAGE gels and visualized by Coomassie staining. The minimal sequence fragments of the linker nucleoporins Nup53 and Nup145N did not interact with other scaffold nucleoporins, demonstrating their specificity for a single scaffold nucleoporin.

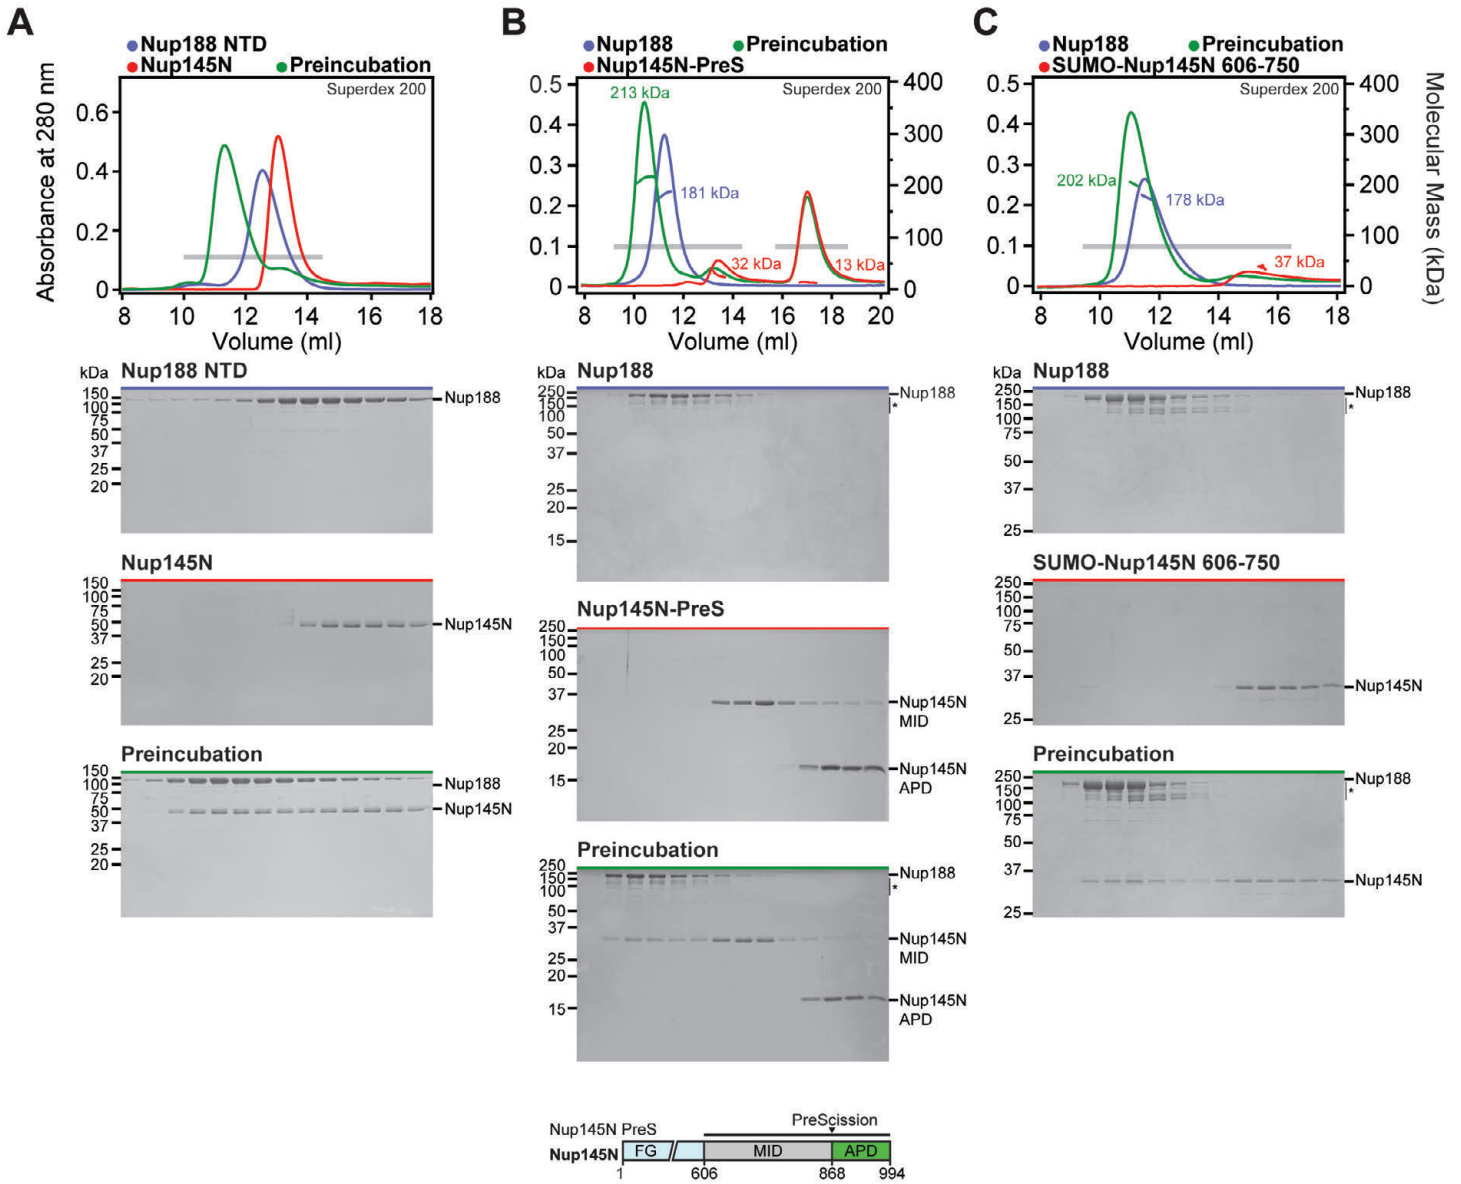

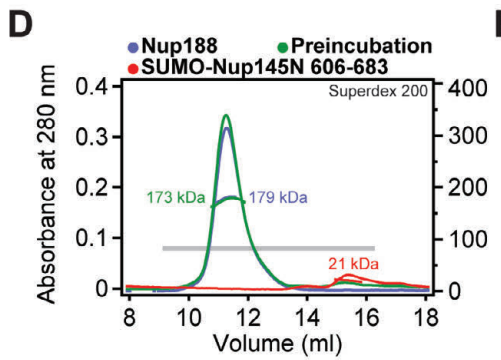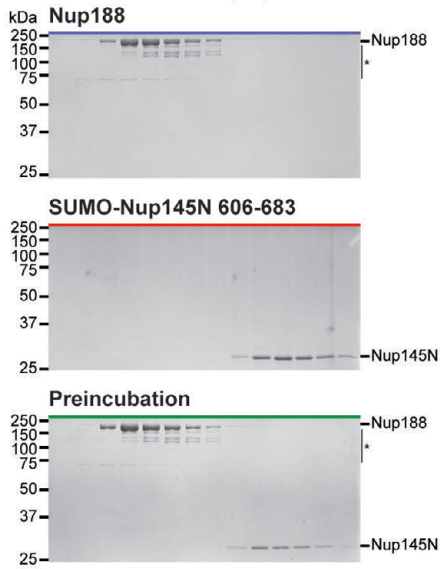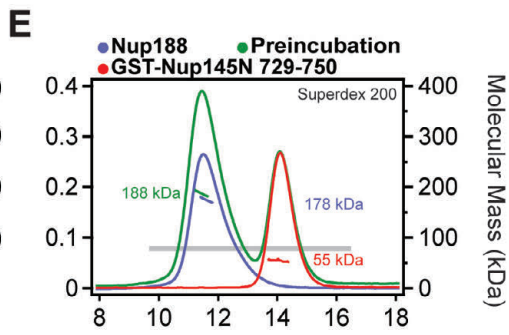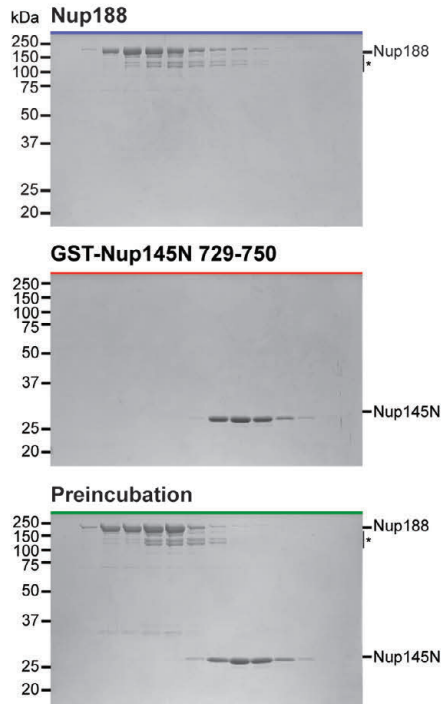

**Fig. S19.**

**Nup188 recognizes Nup145N<sup>606-750</sup> primarily via its NTD.** (A-E) SEC-MALS and SDS-PAGE analysis corresponding to Fig. 2F. SEC-MALS profiles of nucleoporins are shown individually (blue and red) and after their preincubation (green). All SEC profiles were obtained using a Superdex 200 10/300 GL column. Measured molecular masses are indicated for the peak fractions. Gray bars indicate fractions that were resolved on SDS-PAGE gels and visualized by Coomassie staining. Nup188<sup>NTD</sup> is responsible for binding Nup145N. After Nup145N<sup>PreS</sup> cleavage with PreScission protease, Nup145N<sup>MID</sup> co-elutes with Nup188, whereas Nup145N<sup>APD</sup> does not interact with Nup188. As reference, the domain structure of Nup145N<sup>PreS</sup> is shown, indicating the construct boundaries and PreScission cleavage site with a black bar and a black triangle, respectively. Nup188 binds to a minimal sequence on Nup145N between residues 606-750, but does not interact with the minimal Nup145N binding sequences for Nup192 or Nup170.

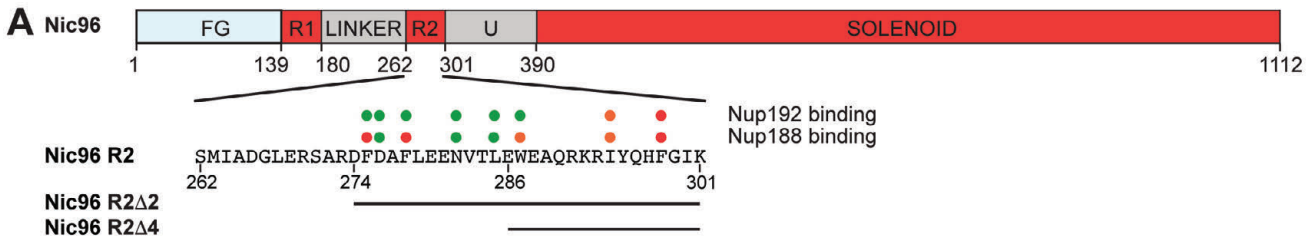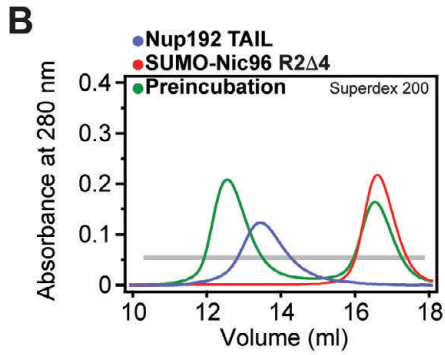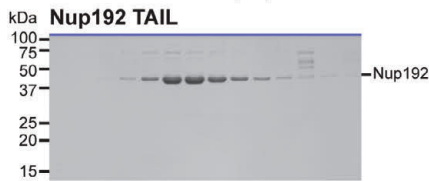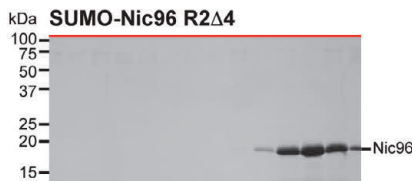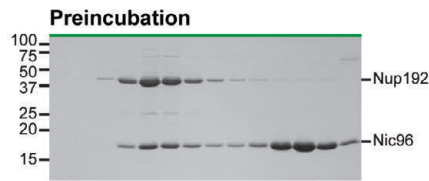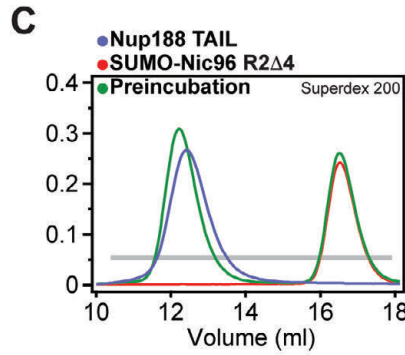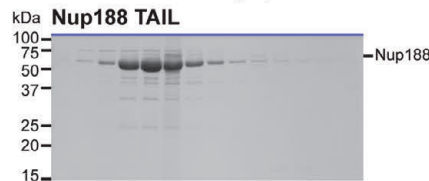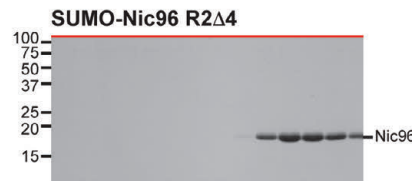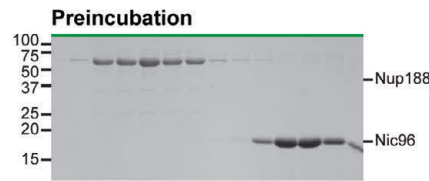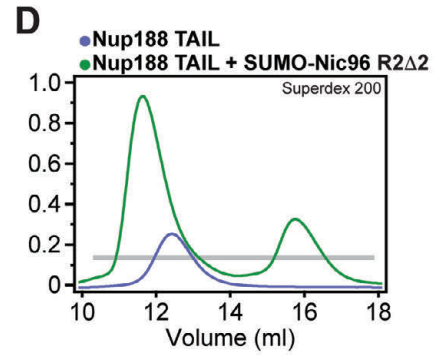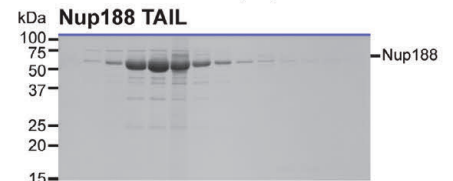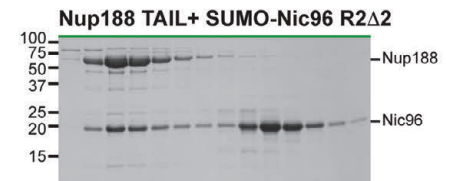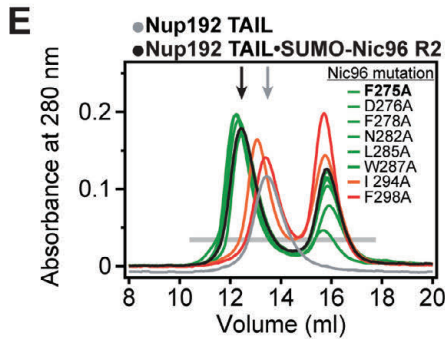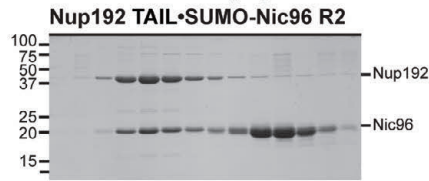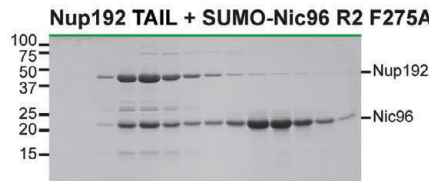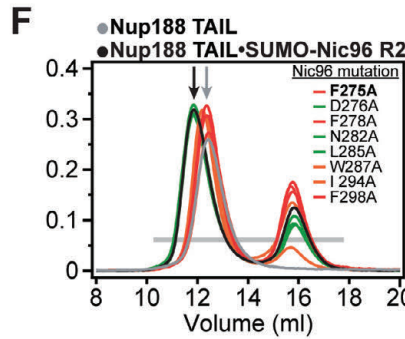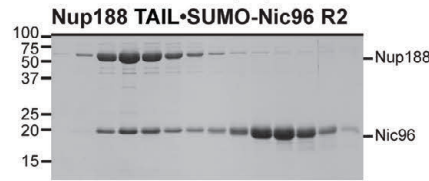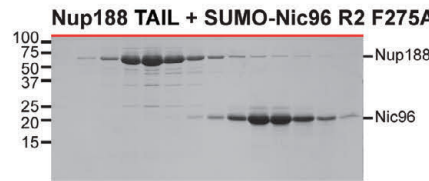

**G**

| Nic96 mutation | Nup192 binding | Nic96 mutation | Nup188 binding |
|----------------|----------------|----------------|----------------|
| F275A          | +++            | F275A          | -              |
| D276A          | +++            | D276A          | +++            |
| F278A          | +++            | F278A          | -              |
| N282A          | +++            | N282A          | +++            |
| L285A          | +++            | L285A          | +++            |
| W287A          | +++            | W287A          | +              |
| I294A          | +              | I294A          | +              |
| F298A          | -              | F298A          | -              |

**Fig. S20.**

**Nup192<sup>TAIL</sup> and Nup188<sup>TAIL</sup> bind to partially overlapping sites in Nic96<sup>R2</sup>.** (A) Domain boundaries of Nic96 with the protein sequence corresponding to the R2 region shown below. Black lines indicate construct boundaries for Nic96<sup>R2</sup>, Nic96<sup>R2Δ2</sup>, and Nic96<sup>R2Δ4</sup>. The effects of Nic96<sup>R2</sup> alanine mutations on Nup192<sup>TAIL</sup> and Nup188<sup>TAIL</sup> binding are indicated by colored dots; no effect (green), reduced binding (orange), and complete disruption (red). (B-D) SEC and SDS-PAGE analysis corresponding to Fig. 2F. SEC profiles of nucleoporins are shown individually (blue and red) and after their preincubation (green). Nic96<sup>R2Δ2</sup> is insoluble when expressed alone and therefore was expressed and purified in the presence of Nup188<sup>TAIL</sup>. (E, F) Mutational analysis of the Nic96<sup>R2</sup> interaction with Nup192<sup>TAIL</sup> and Nup188<sup>TAIL</sup>. SEC profiles of Nup192<sup>TAIL</sup> or Nup188<sup>TAIL</sup> are shown individually (gray) and after preincubation with wild type Nic96<sup>R2</sup> (black) and are annotated with arrows of the same color. SEC profiles of mutant proteins preincubated with Nic96<sup>R2</sup> are colored according to measured effect as in panel (A). All SEC profiles were obtained using a Superdex 200 10/300 GL column. Gray bars indicate fractions that were resolved on SDS-PAGE gels and visualized by Coomassie staining. (G) Table summarizing the measured effects of Nic96<sup>R2</sup> mutation on Nup192<sup>TAIL</sup> and Nup188<sup>TAIL</sup> binding colored according to panel (A): no effect (+++), moderate effect (+), abolished binding (-). The Nic96<sup>R2</sup> F275A mutant abolished binding to Nup188<sup>TAIL</sup> but not to Nup192<sup>TAIL</sup>.

















**Fig. S21.**

**Multispecies sequence alignment of Nup170.** Sequences from twelve diverse species were aligned and colored by sequence similarity according to the BLOSUM62 matrix from white (less than 55 % similarity), to yellow (55 % similarity), to red (100 % identity). Numbering below alignment is relative to the *C. thermophilum* sequence. Secondary structure observed in the Nup170 structures is shown above the alignment:  $\alpha$ -helices (red bars),  $\beta$ -sheets (blue bars), and unstructured regions (black lines). Mutations that affect Nup53 or Nup145N binding identified by a mutational analysis (Fig. 3; figs. S22; fig. S23) are indicated by circles above the alignment and colored according to the measured effect; weak effect (yellow), moderate effect (orange), abolished binding (red). Dashed lines indicate loops that were deleted in crystallization constructs. Disordered regions are indicated by gray dots.

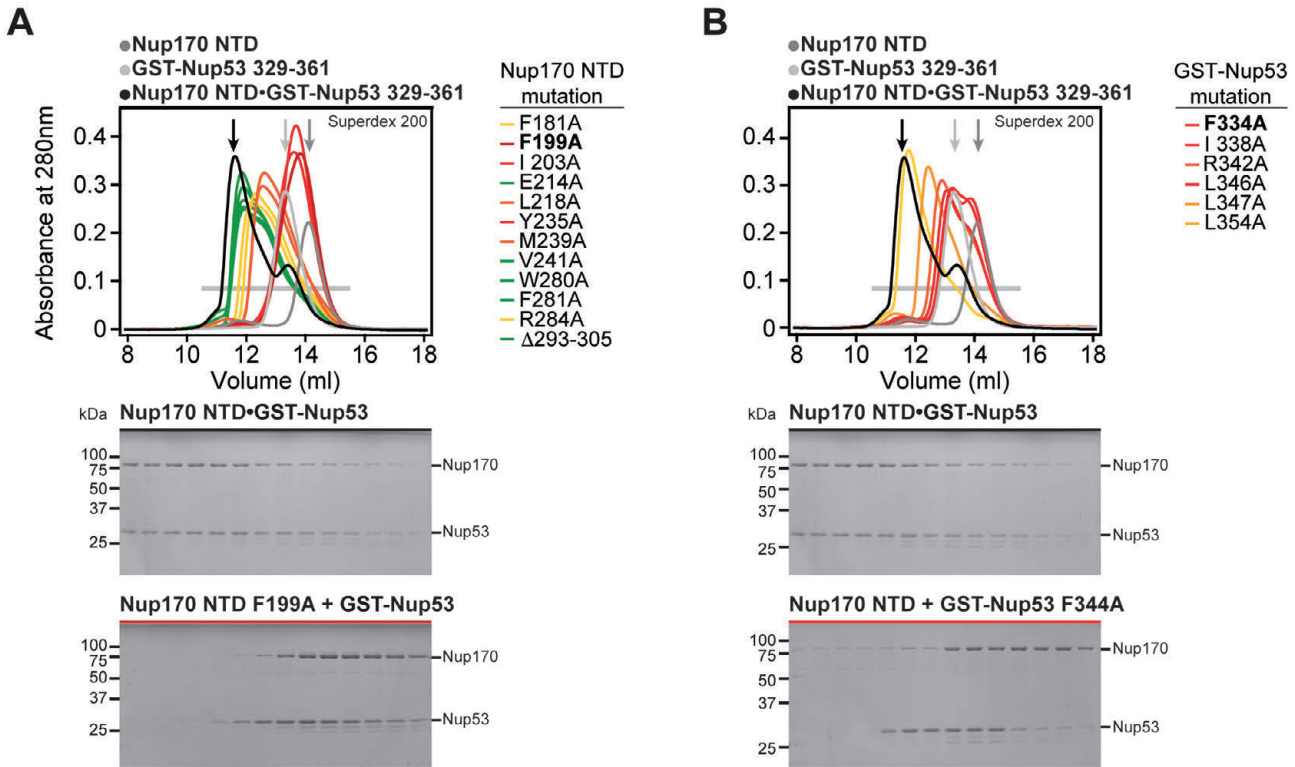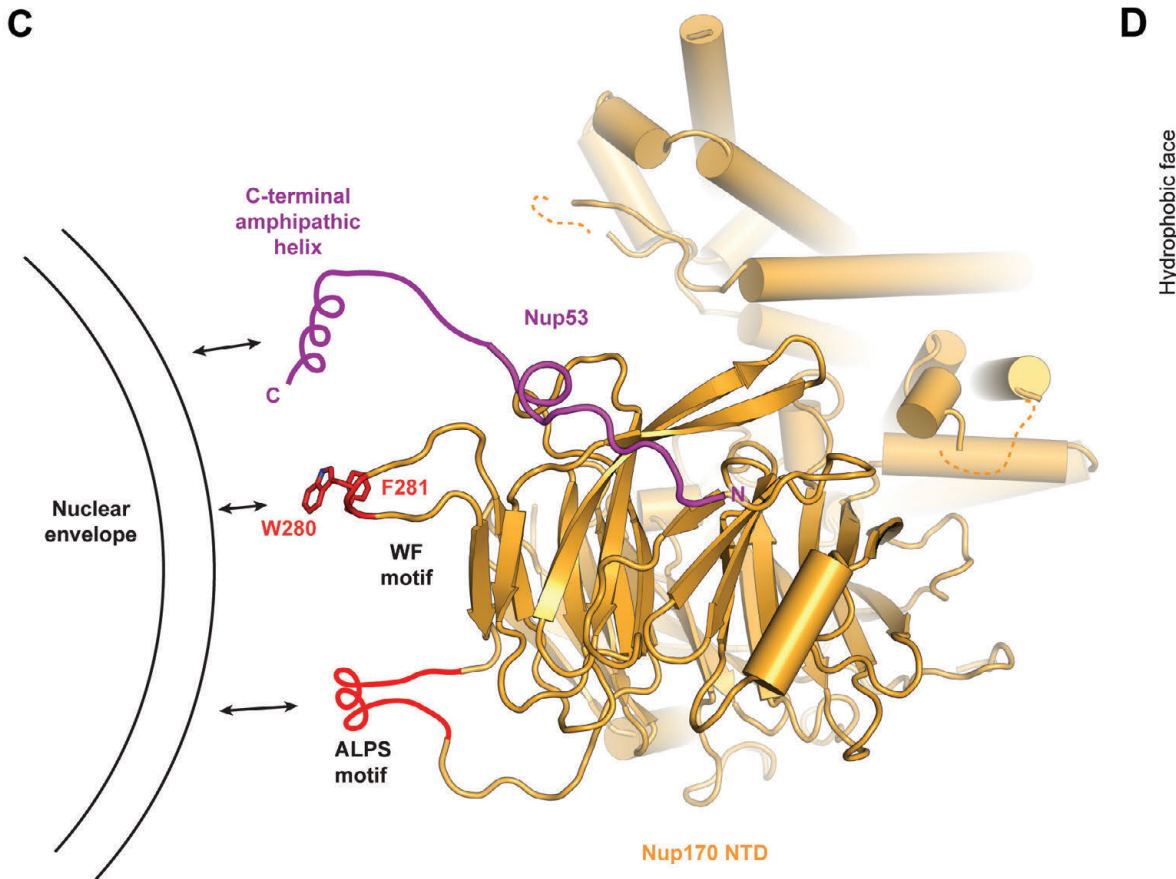

**Fig. S22.**

**Mutational analysis of Nup170<sup>NTD</sup>•Nup53 and proposed interactions with the nuclear envelope.** SEC interaction experiments performed with mutants of (A) Nup170<sup>NTD</sup> and (B) GST-Nup53<sup>329-361</sup>. SEC profiles of wild type Nup170<sup>NTD</sup> (dark gray) and GST-Nup53<sup>329-361</sup> (light gray) are shown individually and after preincubation (black) and are annotated with arrows of the same color. Mutant SEC profiles are colored according to the measured effect: no effect (green), weak effect (yellow), moderate effect (orange), and abolished binding (red). All SEC profiles were obtained using a Superdex 200 10/300 GL column. (C) Nup170<sup>NTD</sup> is shown in cartoon representation and possible membrane interaction motifs are highlighted. The Nup170  $\beta$ -propeller domain contains two sequence motifs, WF and ALPS, which are located on the same face directly adjacent to a C-terminal amphipathic helix of Nup53 that has previously been shown to anchor Nup53 to the nuclear envelope (18, 19). (D) Helical wheel diagrams of the Nup170 ALPS motif in *C. thermophilum*, *S. cerevisiae*, and *H. sapiens* are shown with hydrophobic and polar residues colored in yellow and purple, respectively. The universally conserved proline residue on the polar face of the helix, a feature reminiscent of antimicrobial membrane-destabilizing peptides, is colored in red (34).



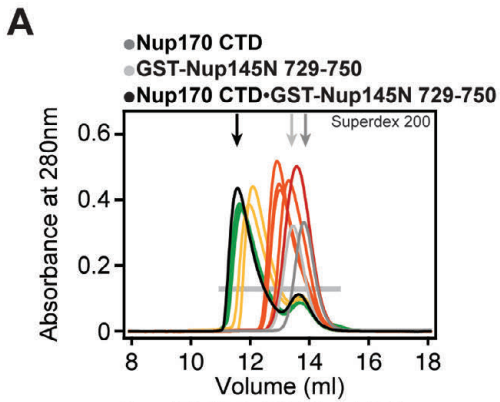

Nup170 CTD mutation

- V1062A
- V1066A
- E1116A
- L1111A
- I1131A
- I1147A
- F1154A
- Y1157A
- Y1164A
- F1171A

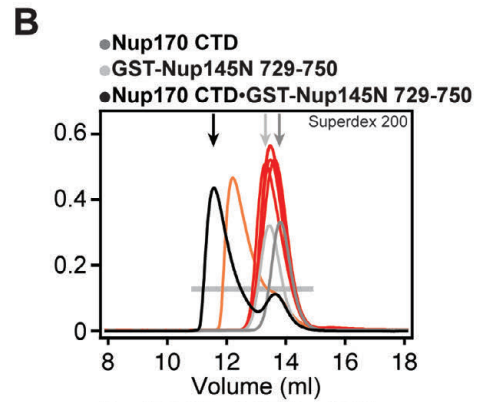

GST-Nup145N mutation

- I735A
- L733A
- V734A
- D742A
- L743A
- F744A

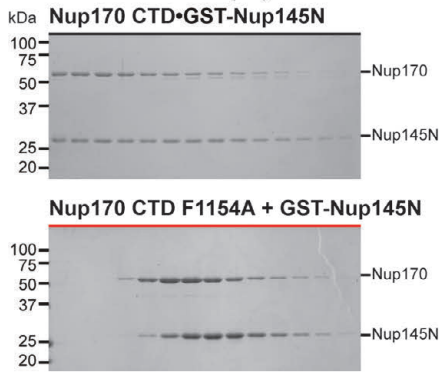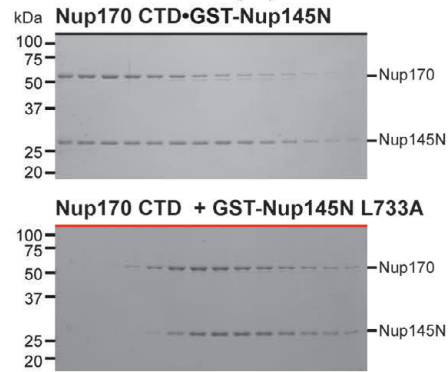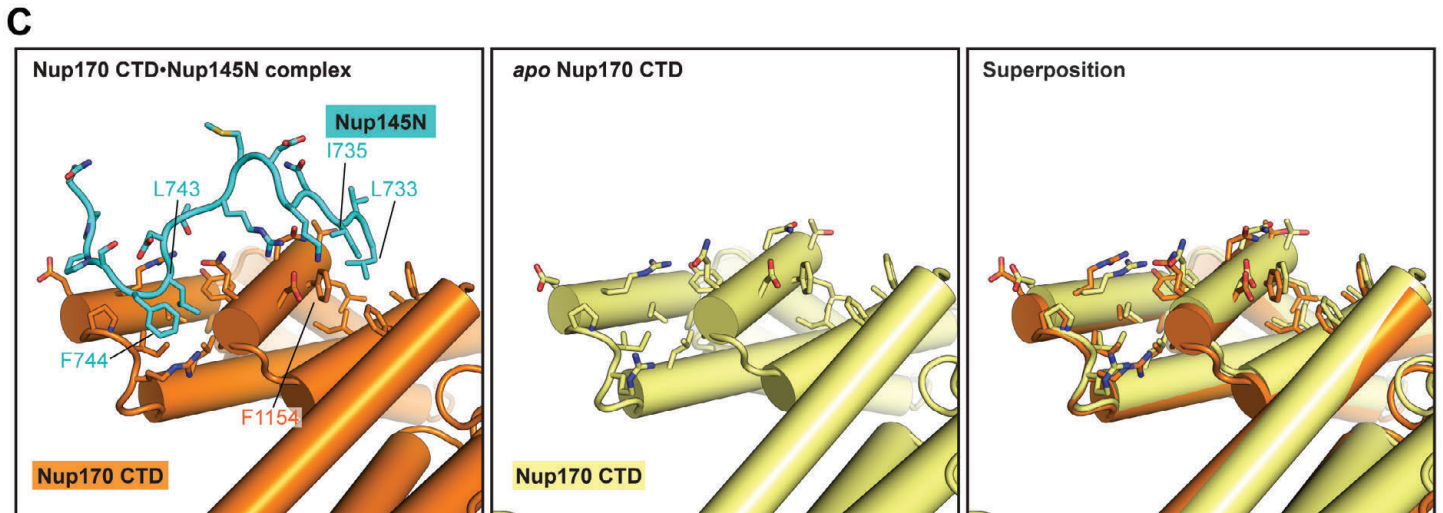

**Fig. S23.**

**Mutational and structural analyses of the Nup170<sup>CTD</sup>-Nup145N interaction.** SEC interaction experiments performed with mutants of **(A)** Nup170<sup>CTD</sup> and **(B)** GST-Nup145N<sup>729-750</sup>. SEC profiles of wild type Nup170<sup>CTD</sup> (dark gray) and GST-Nup145N<sup>729-750</sup> (light gray) are shown individually and after preincubation (black) and are annotated with arrows of the same color. Mutant SEC profiles colored according to measured effect: no effect (green), weak effect (yellow), moderate effect (orange), and abolished binding (red). All SEC profiles were obtained using a Superdex 200 10/300 GL column. **(C)** Comparison of the Nup145N binding pocket in Nup170 in the bound and *apo* states reveals minimal conformational changes upon binding.

**A**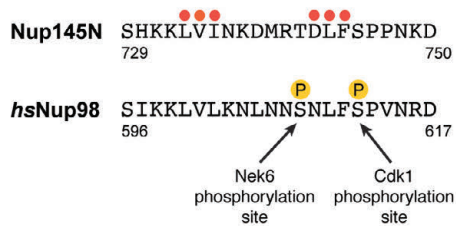**B**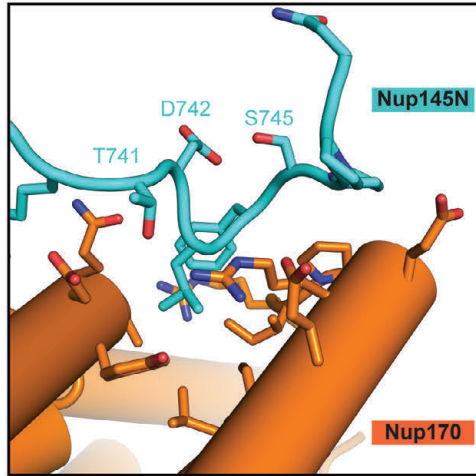**C**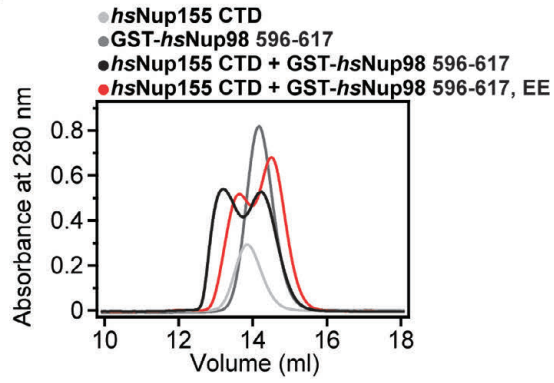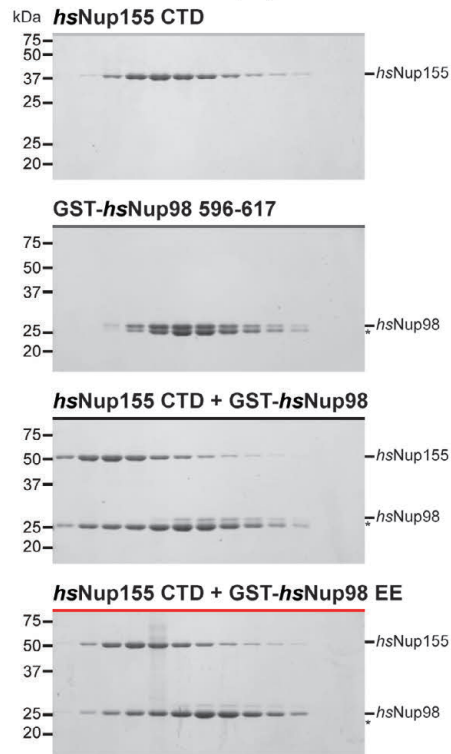

**Fig. S24.**

**The Nup170<sup>CTD</sup>-Nup145N interaction is conserved in humans and partially disrupted by phosphomimetic mutations.** (A) Sequence alignment of Nup145N<sup>729-750</sup> and *hsNup98*<sup>596-617</sup>. Nup145N<sup>729-750</sup> mutants are indicated by circles and colored as in Fig. 3J. *hsNup98* residues S608 and S612 that are phosphorylated during mitosis are indicated (35). (B) Close-up view of the Nup170<sup>CTD</sup>-Nup145N interaction indicating the positioning of T741 and S745 in Nup145N, which correspond to the mitotically phosphorylated *hsNup98* residues S608 and S612. (C) SEC interaction analysis of the *hsNup155*<sup>CTD</sup>-*hsNup98*<sup>596-617</sup> interaction. SEC profiles of *hsNup155*<sup>CTD</sup> (light gray) and *hsNup98*<sup>596-617</sup> (dark grey), the preincubation of the wild type proteins (black), and the preincubation of *hsNup155*<sup>CTD</sup> with the phosphomimetic *hsNup98*<sup>596-617</sup> S608E/S612E double mutant (red) are shown. All SEC profiles were obtained using a Superdex 200 10/300 GL column. Gray bars indicate fractions that were resolved on SDS-PAGE gels and visualized by Coomassie staining.

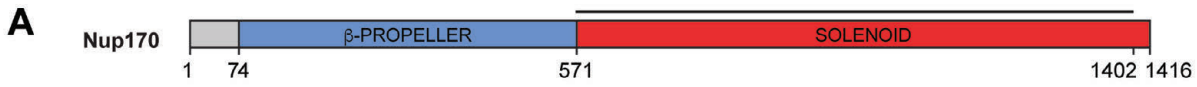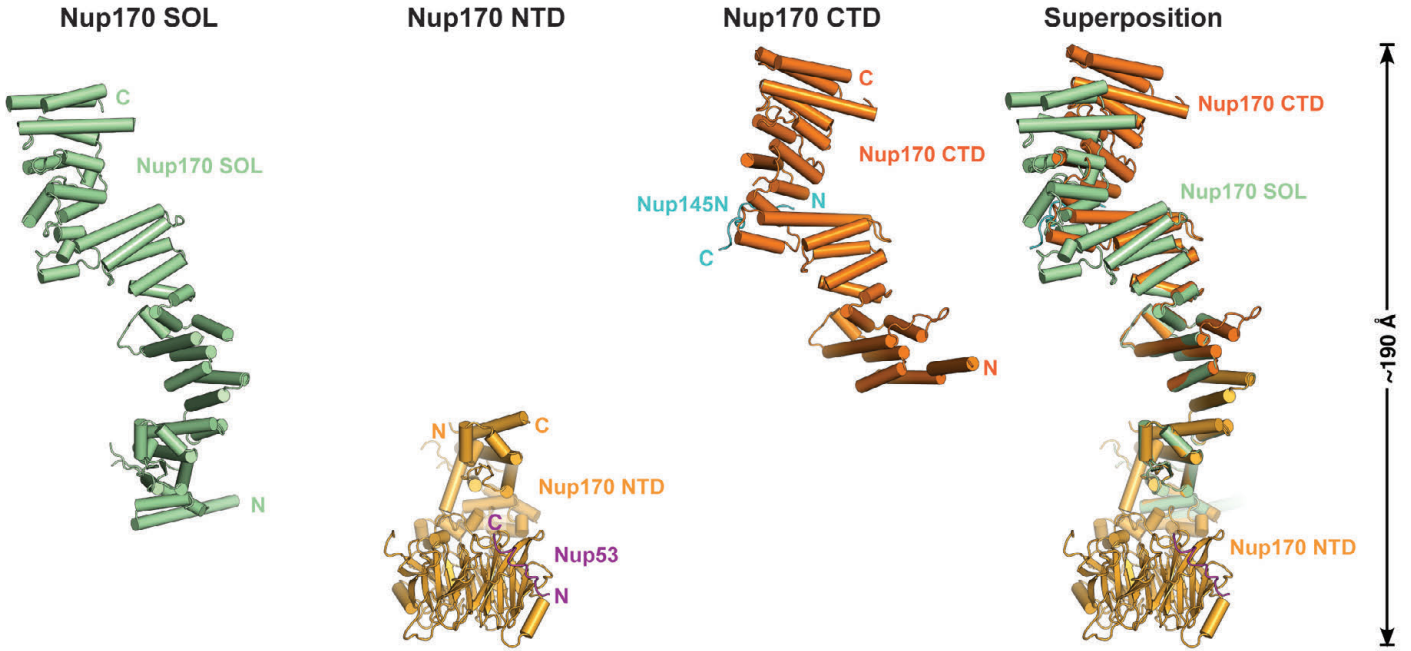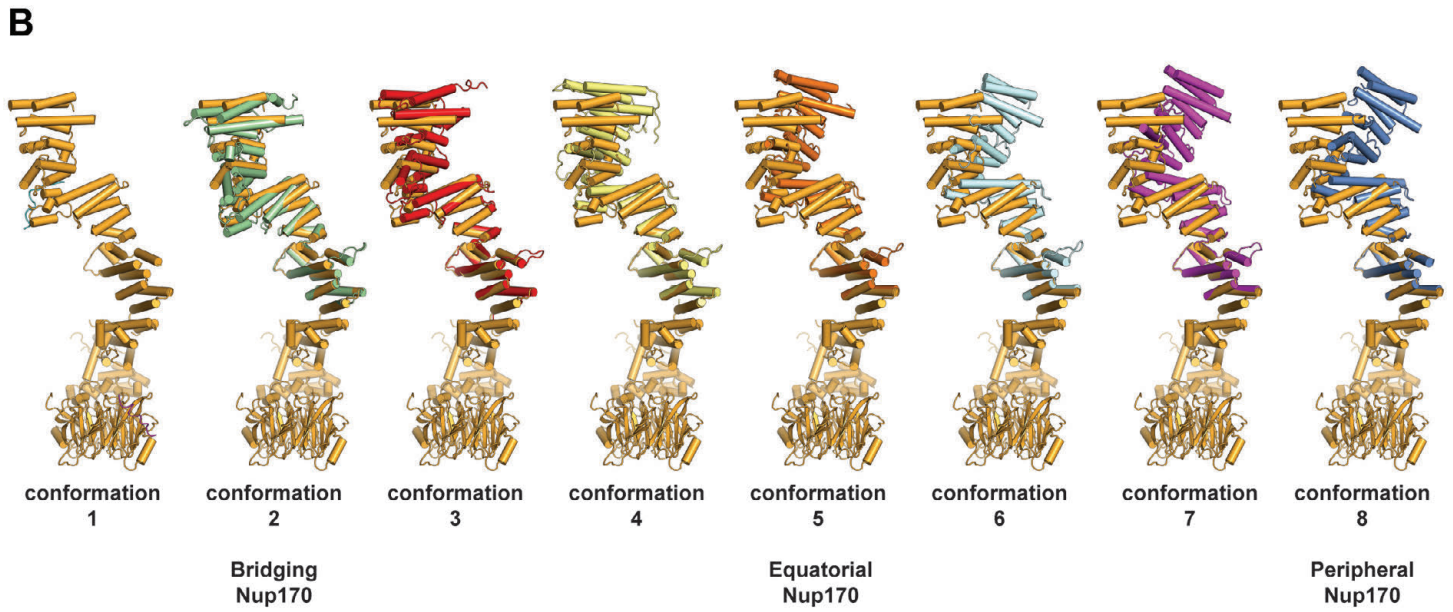

**Fig. S25.**

**Superposition-generated structures of full-length Nup170.** (A) The construct boundaries of Nup170<sup>SOL</sup> are indicated by a black line above the domain structure. The crystal structures of Nup170<sup>SOL</sup> (green), Nup170<sup>NTD</sup> (light orange), and Nup170<sup>CTD</sup> (dark orange), and their superposition are shown in cartoon representation. See also [Movie 1](#). (B) Complete conformational range of Nup170 generated by superposing different conformations of Nup170<sup>CTD</sup> with the structure of Nup170<sup>SOL</sup>. Conformations were obtained from the Nup170<sup>SOL</sup> structure (conformation 1), different molecules in the asymmetric unit of the *apo* Nup170<sup>CTD</sup> structures (conformations 2, 3, and 4), and different molecules in the asymmetric unit of the Nup170<sup>CTD</sup>•Nup145N complex structure (conformations 5, 6, 7, and 8). The conformations that were docked into cryoET reconstruction of the NPC are indicated below. See also [Movie 2](#).

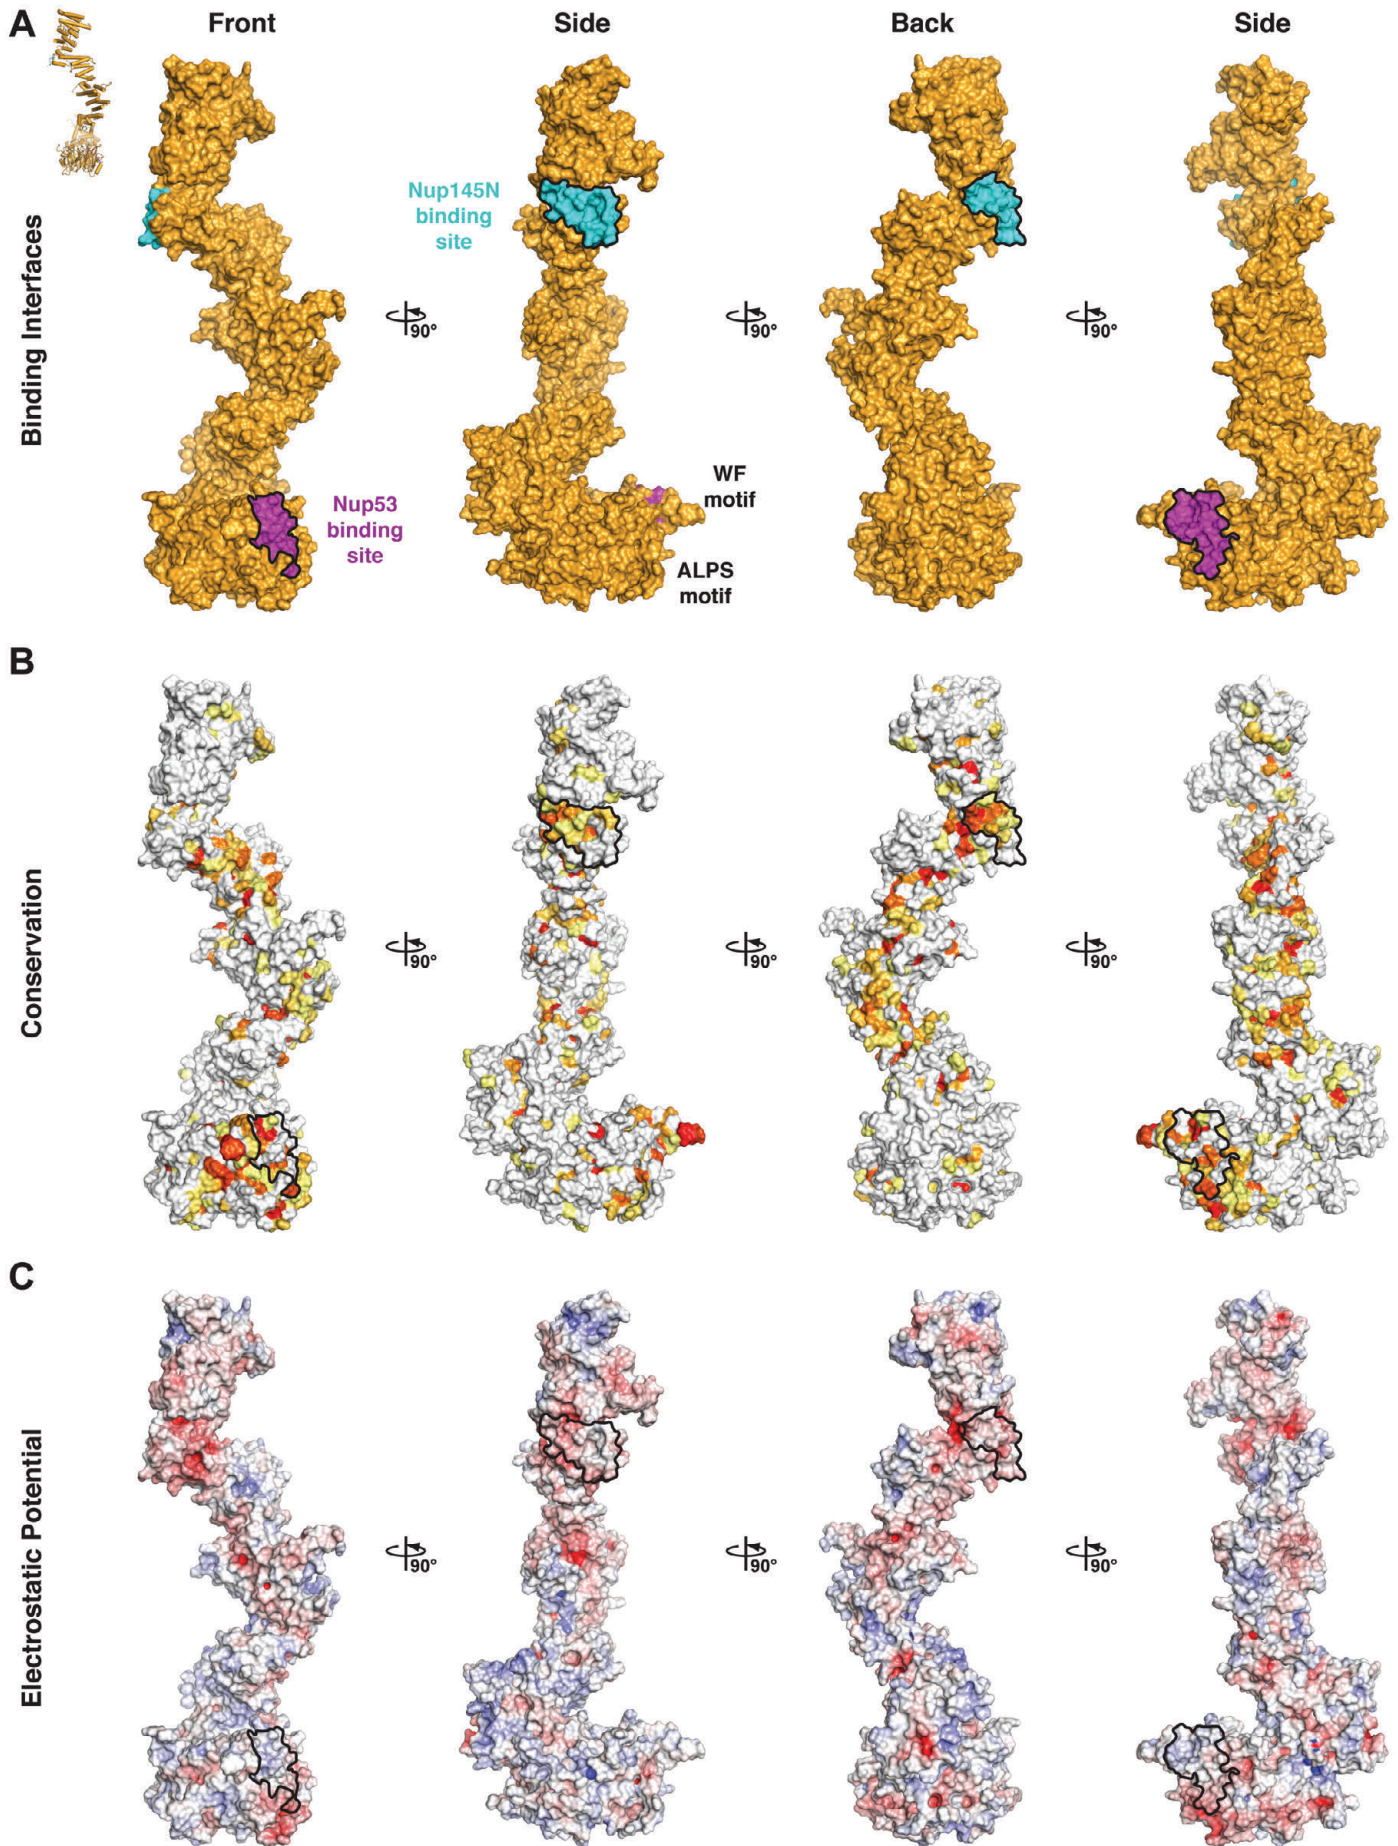

**Fig. S26.**

**Surface properties of Nup170.** Surface representations of Nup170 is shown in four different orientations related by 90° rotations. Nup53 and Nup145N binding interfaces are outlined in black. **(A)** Surface representation with the Nup53 and Nup145N binding sites colored in purple and cyan, respectively. **(B)** Surface representation colored according to sequence identity based on the alignment in [fig. S21](#). **(C)** Surface representation colored according to electrostatic potential from  $-10 k_B T/e$  (red) to  $+10 k_B T/e$  (blue).











Nic96

$\alpha 26$

|                       |     |   |   |   |   |   |   |   |   |   |     |   |   |   |   |   |   |   |   |   |     |   |   |   |   |   |   |   |   |   |     |   |   |   |   |   |   |   |   |   |     |   |   |   |   |   |   |   |   |   |   |
|-----------------------|-----|---|---|---|---|---|---|---|---|---|-----|---|---|---|---|---|---|---|---|---|-----|---|---|---|---|---|---|---|---|---|-----|---|---|---|---|---|---|---|---|---|-----|---|---|---|---|---|---|---|---|---|---|
|                       |     |   |   |   |   |   |   |   |   |   |     |   |   |   |   |   |   |   |   |   |     |   |   |   |   |   |   |   |   |   |     |   |   |   |   |   |   |   |   |   |     |   |   |   |   |   |   |   |   |   |   |
| <i>C.thermophilum</i> | V   | V | S | I | V | S | R | A | L | S | E   | A | I | S | L | E | I | G | E | D | P   | M | R | L | I | P | V | K | P | R | .   | . | V | T | N | A | E | G | Q | V | E   | E | A | A | P | G | S | S | L | S | L |
| <i>A.nidulans</i>     | V   | I | D | I | I | N | R | T | L | S | D   | S | V | A | T | P | L | G | S | P | T   | L | R | L | Q | P | L | W | P | R | T   | N | L | S | Q | E | S | G | Q | E | T   | P | I | E | P | G | T | S | L | S | L |
| <i>N.crassa</i>       | V   | I | A | I | V | S | R | A | L | S | E   | A | V | S | L | E | I | G | E | D | P   | L | R | L | V | P | I | K | P | R | .   | . | . | . | A | D | G | D | V | A | N   | A | Q | Q | G | T | S | L | S | L |   |
| <i>P.pastoris</i>     | V   | I | S | L | I | N | K | L | L | G | D   | L | L | A | S | T | D | L | E | . | .   | . | . | . | . | . | . | . | . | . | .   | . | . | T | A | I | D | T | P | A | E   | R | . | . | . | . | . | . |   |   |   |
| <i>A.gossypii</i>     | V   | I | S | I | V | N | K | L | L | S | E   | M | L | S | N | T | D | L | A | Q | P   | L | . | . | . | . | . | . | . | . | .   | . | M | R | Q | D | D | N | S | E | T   | . | . | . | . | . |   |   |   |   |   |
| <i>S.cerevisiae</i>   | V   | I | T | L | V | N | S | L | L | S | D   | T | L | S | A | S | D | L | D | Q | P   | L | . | . | . | . | . | . | . | . | .   | . | . | V | G | P | D | D | N | S | E   | T | . | . | . | . | . |   |   |   |   |
| <i>S.pombe</i>        | V   | I | G | V | A | I | K | N | L | S | Q   | S | I | V | S | R | G | L | W | S | .   | . | . | . | . | . | . | . | . | . | .   | . | I | D | S | K | E | S | K | N | M   | H | I | S | S | N | V |   |   |   |   |
| <i>C.elegans</i>      | A   | A | I | L | L | S | S | E | I | S | E   | T | L | R | T | . | . | . | . | . | .   | . | . | . | . | . | . | . | . | . | .   | . | . | . | . | . | . | . | . | . | .   | . | . | . | . | . | . | . |   |   |   |
| <i>D.melanogaster</i> | A   | L | R | L | V | N | S | L | L | A | Q   | V | V | H | Q | P | . | . | . | . | .   | . | . | . | . | . | . | . | . | . | .   | . | T | Q | N | G | S | V | R | N | R   | . | . | . | . | . | . |   |   |   |   |
| <i>D.erio</i>         | V   | L | E | L | M | N | K | L | L | S | P   | V | I | A | Q | V | . | . | . | . | .   | . | . | . | . | . | . | . | . | . | .   | . | S | E | P | Q | S | N | K | E | R   | . | . | . | . | . |   |   |   |   |   |
| <i>X.laevis</i>       | V   | L | E | L | T | N | K | L | L | S | P   | V | V | S | Q | I | . | . | . | . | .   | . | . | . | . | . | . | . | . | . | .   | . | S | A | P | Q | S | N | R | E | R   | . | . | . | . | . |   |   |   |   |   |
| <i>H.sapiens</i>      | V   | L | E | L | M | N | K | L | L | S | P   | V | V | P | Q | I | . | . | . | . | .   | . | . | . | . | . | . | . | . | . | .   | . | S | A | P | Q | S | N | K | E | R   | . | . | . | . | . |   |   |   |   |   |
| 900                   | 910 |   |   |   |   |   |   |   |   |   | 920 |   |   |   |   |   |   |   |   |   | 930 |   |   |   |   |   |   |   |   |   | 940 |   |   |   |   |   |   |   |   |   | 948 |   |   |   |   |   |   |   |   |   |   |

$\alpha 27$   $\alpha 28$

|                       |     |   |   |   |   |   |   |   |   |   |     |   |   |   |   |   |   |   |   |   |     |   |   |   |   |   |   |   |   |   |     |   |   |   |   |   |   |   |   |   |     |   |   |   |   |   |   |   |   |   |   |   |
|-----------------------|-----|---|---|---|---|---|---|---|---|---|-----|---|---|---|---|---|---|---|---|---|-----|---|---|---|---|---|---|---|---|---|-----|---|---|---|---|---|---|---|---|---|-----|---|---|---|---|---|---|---|---|---|---|---|
|                       |     |   |   |   |   |   |   |   |   |   |     |   |   |   |   |   |   |   |   |   |     |   |   |   |   |   |   |   |   |   |     |   |   |   |   |   |   |   |   |   |     |   |   |   |   |   |   |   |   |   |   |   |
| <i>C.thermophilum</i> | A   | A | I | D | D | P | V | E | L | A | K   | A | M | M | G | M | Y | E | R | D | H   | M | F | W | Q | K | I | R | E | P | N   | R | V | A | C | S | V | L | L | Q | M   | A | D | I | K | S | L | V | E | Q | G |   |
| <i>A.nidulans</i>     | T   | V | V | E | D | P | V | V | L | A | K   | N | M | I | G | L | Y | N | Q | N | A   | L | Y | Y | Q | R | I | R | R | S | N   | R | D | A | C | G | V | L | L | R | M   | M | E | A | K | A | E | V | E | A | G |   |
| <i>N.crassa</i>       | A   | A | I | D | D | P | V | E | L | A | H   | T | M | M | S | M | Y | E | R | D | A   | M | F | L | N | H | V | R | D | Q | N   | R | I | A | C | N | I | L | L | K | M   | S | E | I | K | E | M | I | Q | R | N |   |
| <i>P.pastoris</i>     | A   | A | E | G | S | I | A | L | A | E | R   | L | M | K | Q | Y | S | S | T | E | I   | S | G | K | V | L | L | K | H | R | E   | T | C | S | I | L | L | L | K | M | V   | E | C | R | D | L | F | V | K | Q |   |   |
| <i>A.gossypii</i>     | .   | . | . | . | . | N | P | V | L | I | A   | K | K | L | I | D | V | Y | I | K | N   | L | E | I | S | K | V | H | R | K | N   | K | E | T | C | I | L | L | L | K | L   | V | D | I | R | R | T | Y | I | A | R |   |
| <i>S.cerevisiae</i>   | .   | . | . | . | . | N | P | V | L | L | A   | R | R | M | A | S | I | Y | F | D | N   | A | G | I | S | R | Q | I | H | V | K   | N | K | E | I | C | M | L | L | L | N   | I | S | S | I | R | E | L | Y | F | N | K |
| <i>S.pombe</i>        | V   | A | S | E | A | P | D | A | L | A | A   | N | L | L | A | M | Y | E | S | N | P   | K | K | S | A | K | V | S | A | T | N   | K | K | A | L | K | V | L | L | K | V   | V | K | V | Q | K | L | Y | G | Q | E |   |
| <i>C.elegans</i>      | .   | . | . | . | . | . | . | . | . | I | A   | D | . | L | V | H | V | A | E | Q | F   | K | K | V | Q | R | G | C | Q | A | S   | E | Y | A | T | L | S | L | L | V | D   | L | A | V | L | F | D | H | C | R | N | E |
| <i>D.melanogaster</i> | .   | . | . | . | . | . | . | . | . | L | G   | D | I | I | N | R | L | D | A | A | L   | V | V | R | K | S | D | V | E | V | Q   | V | V | V | T | Y | T | V | L | T | K   | V | M | K | F | F | D | H | Y | H | E | G |
| <i>D.erio</i>         | .   | . | . | . | . | . | . | . | . | L | K   | N | M | A | V | A | I | A | E | R | Y   | R | A | N | G | V | A | G | E | K | S   | V | D | N | T | F | Y | L | L | L | D   | L | M | T | F | F | D | E | Y | H | A | G |
| <i>X.laevis</i>       | .   | . | . | . | . | . | . | . | . | L | K   | N | M | A | L | A | I | A | E | R | Y   | K | S | Q | G | V | S | A | E | K | S   | I | N | S | T | F | Y | L | L | L | D   | L | I | T | F | F | D | E | Y | H | A | G |
| <i>H.sapiens</i>      | .   | . | . | . | . | . | . | . | . | L | K   | N | M | A | L | S | I | A | E | R | Y   | R | A | Q | G | I | S | A | N | K | F   | V | D | S | T | F | Y | L | L | L | D   | L | I | T | F | F | D | E | Y | H | S | G |
| 949                   | 960 |   |   |   |   |   |   |   |   |   | 970 |   |   |   |   |   |   |   |   |   | 980 |   |   |   |   |   |   |   |   |   | 990 |   |   |   |   |   |   |   |   |   | 999 |   |   |   |   |   |   |   |   |   |   |   |

$\alpha 29$   $\alpha 30$   $\alpha 31$

|                       |      |   |   |   |   |   |   |   |   |   |      |   |   |   |   |   |   |   |   |   |      |   |   |   |   |   |   |   |   |   |      |   |   |   |   |   |   |   |   |   |   |   |   |   |   |   |   |   |   |   |
|-----------------------|------|---|---|---|---|---|---|---|---|---|------|---|---|---|---|---|---|---|---|---|------|---|---|---|---|---|---|---|---|---|------|---|---|---|---|---|---|---|---|---|---|---|---|---|---|---|---|---|---|---|
|                       |      |   |   |   |   |   |   |   |   |   |      |   |   |   |   |   |   |   |   |   |      |   |   |   |   |   |   |   |   |   |      |   |   |   |   |   |   |   |   |   |   |   |   |   |   |   |   |   |   |   |
| <i>C.thermophilum</i> | R    | W | A | E | C | L | D | K | I | R | A    | L | D | I | L | P | L | T | A | R | G    | D | P | . | . | . | . | . | . | . | .    | G | T | I | R | S | Y | A | A | R | F | P | S | L | A | Q | P | V |   |   |
| <i>A.nidulans</i>     | K    | W | T | A | A | L | D | T | I | N | E    | L | G | I | L | P | L | R | A | N | G    | S | V | . | . | . | . | . | . | . | .    | P | Y | I | R | S | A | A | Q | A | F | S | S | L | S | S | L | I |   |   |
| <i>N.crassa</i>       | E    | W | A | Q | A | I | D | V | I | R | S    | L | E | I | L | P | T | D | D | C | M    | G | D | . | . | . | . | . | . | . | .    | P | A | K | I | R | S | Y | A | S | K | F | S | S | L | P | Q | P | E | V |
| <i>P.pastoris</i>     | E    | W | E | K | A | L | K | Q | I | G | Q    | L | D | M | L | P | I | V | A | G | V    | N | V | . | . | . | . | . | . | . | .    | . | A | V | A | R | S | K | V | E | V | F | N | S | Y | D | E | S | V |   |
| <i>A.gossypii</i>     | Q    | W | Q | N | T | L | Q | Q | I | E | E    | L | D | L | L | P | S | V | E | D | S    | S | P | . | . | . | . | . | . | . | .    | . | . | R | K | K | A | Q | E | F | H | N | L | D | D | C | I |   |   |   |
| <i>S.cerevisiae</i>   | Q    | W | Q | E | T | L | S | Q | M | E | L    | L | D | L | L | P | F | S | D | E | L    | S | A | . | . | . | . | . | . | . | .    | . | . | R | K | K | A | Q | D | F | S | N | L | D | D | N | I |   |   |   |
| <i>S.pombe</i>        | K    | W | E | V | L | Q | L | I | E | H | L    | D | L | L | P | I | N | E | V | Q | A    | E | F | E | P | N | E | Q | I | P | P    | I | S | A | R | L | R | R | A | F | E | F | S | T | F | Q | D | E | V |   |
| <i>C.elegans</i>      | E    | A | E | I | A | Y | G | I | S | T | H    | L | R | L | I | P | T | E | P | D | Q    | V | T | . | . | . | . | . | . | . | .    | . | . | V | I | V | N | E | F | H | M | V | P | Q | K | V |   |   |   |   |
| <i>D.melanogaster</i> | A    | L | R | S | A | L | E | I | L | T | N    | N | H | L | I | P | A | S | S | L | E    | V | D | . | . | . | . | . | . | . | .    | . | . | E | C | V | T | N | I | K | R | M | G | P | E | V |   |   |   |   |
| <i>D.erio</i>         | H    | I | D | R | A | Y | D | V | I | E | R    | L | K | L | V | P | L | S | Q | D | S    | V | E | . | . | . | . | . | . | . | .    | . | . | E | R | V | A | A | F | R | N | F | S | D | E | V |   |   |   |   |
| <i>X.laevis</i>       | H    | I | D | L | S | F | D | V | I | E | R    | L | K | L | V | P | L | S | Q | D | S    | V | E | . | . | . | . | . | . | . | .    | . | . | E | R | V | A | A | F | R | N | F | S | D | E | I |   |   |   |   |
| <i>H.sapiens</i>      | H    | I | D | R | A | F | D | I | E | R | L    | K | L | V | P | L | N | Q | E | S | V    | E | . | . | . | . | . | . | . | . | .    | . | E | R | V | A | A | F | R | N | F | S | D | E | I |   |   |   |   |   |
| 1000                  | 1010 |   |   |   |   |   |   |   |   |   | 1020 |   |   |   |   |   |   |   |   |   | 1030 |   |   |   |   |   |   |   |   |   | 1039 |   |   |   |   |   |   |   |   |   |   |   |   |   |   |   |   |   |   |   |

$\alpha 32$   $\alpha 33$

|                       |   |   |   |   |   |   |   |   |   |   |   |   |   |   |   |   |   |   |   |   |   |   |   |   |   |   |   |   |   |   |   |   |   |   |   |   |   |   |   |   |   |   |   |   |   |   |   |   |   |   |   |   |
|-----------------------|---|---|---|---|---|---|---|---|---|---|---|---|---|---|---|---|---|---|---|---|---|---|---|---|---|---|---|---|---|---|---|---|---|---|---|---|---|---|---|---|---|---|---|---|---|---|---|---|---|---|---|---|
|                       |   |   |   |   |   |   |   |   |   |   |   |   |   |   |   |   |   |   |   |   |   |   |   |   |   |   |   |   |   |   |   |   |   |   |   |   |   |   |   |   |   |   |   |   |   |   |   |   |   |   |   |   |
| <i>C.thermophilum</i> | A | I | N | V | P | N | L | L | M | W | T | V | L | C | C | M | R | Q | R | E | R | L | A | G | G | Q | F | A | G | N | E | . | . | . | . | . | . | S | T | A | R | L | M | M | D | E | L | K | Q | M |   |   |
| <i>A.nidulans</i>     | S | G | N | I | G | H | V | I | W | S | I | T | C | I | C | I | G | R | E | R | E | R | L | N | T | G | P | Y | . | . | E | N | . | . | . | . | . | . | E | M | R | O | G | L | A | E | E | L | L | V | M |   |
| <i>N.crassa</i>       | A | I | N | V | P | N | L | L | M | W | T | I | I | C | C | T | R | Q | R | E | R | E | R | L | N | T | G | Q | F | V | G | N | T | . | . | . | . | . | . | G | T | A | R | E | M | L | A | R | L | K | Q | I |
| <i>P.pastoris</i>     | A | K | N | V | P | D | L | L | V | M | T | L | T | C | I | A | Q | L | T | Y | Q | L | T | S | S | E | F | . | . | N | G | . | . | . | . | . | . | . | . | L | V | K | S | D | K | I | K | Y | L | K | E | V |
| <i>A.gossypii</i>     | I | K | N | V | P | N | L | L | I | I | A | M | T | C | V | S | N | L | I | K | Q | L | S | K | G | P | F | . | . | S | N | . | . | . | . | . | . | . | . | G | A | T | Q | A | Q | V | E | A | L | K | K | V |
| <i>S.cerevisiae</i>   | V | K | N | I | P | N | L | L | I | I | T | L | S | C | I | S | N | M | I | H | I | L | N | E | S | K | Y | . | . | Q | S | . | . | . | . | . | . | . | . | S | T | K | G | Q | Q | I | D | S | L | K | N | V |
| <i>S.pombe</i>        | L | S | V | I | P | S | L | M | Y | I | S | M | S | S | I | K | A | L | Y | R | T | I | S | K | L | P | V | . | . | V | N | . | . | . | . | . | . | . | . | E | E | S | K | K | L | Q | R | L | Q | F | K |   |
| <i>C.elegans</i>      | R | E | V | L | P | D | M | C | L | H | L | M | K | C | L | V | D | H | C | I | R | Q | S | T | T | Q | A | N | R | G | A | . | . | N | S | A | T | T | S | M | F | S | S | S | N | R | Y | V | K | Q |   |   |
| <i>D.melanogaster</i> | I | K | V | L | P | D | I | L | L | A | S | M | D | I | V | Y | Q | E | Y | V | K | L | M | D | S | N | E | T | A | S | G | F | F | D | E | S | K | V | N | K | E | P | A | V | K | H | L | R | D | R |   |   |
| <i>D.erio</i>         | R | H | N | L | S | E | V |   |   |   |   |   |   |   |   |   |   |   |   |   |   |   |   |   |   |   |   |   |   |   |   |   |   |   |   |   |   |   |   |   |   |   |   |   |   |   |   |   |   |   |   |   |

**Fig. S27.**

**Multispecies sequence alignment of Nic96<sup>SOL</sup>.** Sequences from twelve diverse species were aligned and colored by sequence similarity according to the BLOSUM62 matrix from white (less than 55 % similarity), to yellow (55 % similarity), to red (100 % identity). Numbering below alignment is relative to the *C. thermophilum* sequence. Secondary structure observed in the Nic96 structure is shown above the alignment:  $\alpha$ -helices (red bars),  $\beta$ -sheets (blue bars), and unstructured regions (black lines). The secondary structure of R2 is unknown, but predicted to be helical, which is indicated by a red outline. Mutations that affect binding to Nup53, Nup188, or Nup192 found by mutational analysis (figs. S20 and S28) are indicated by circles above the alignment and colored according to the measured effect; weak effect (yellow), moderate effect (orange), and abolished binding (red). Disordered regions are indicated by gray dots.

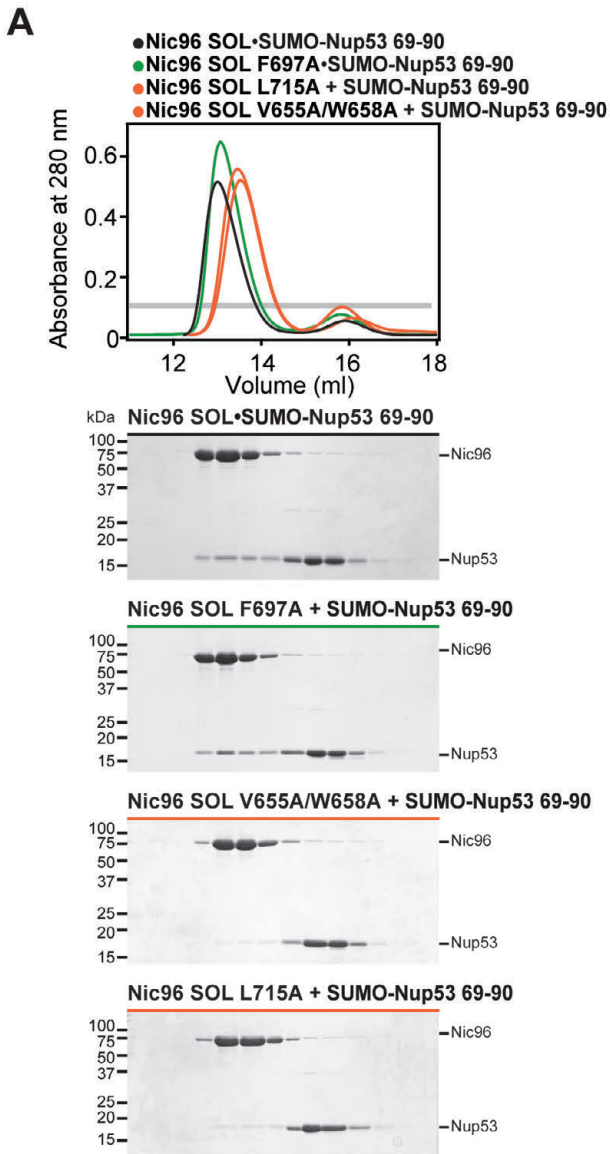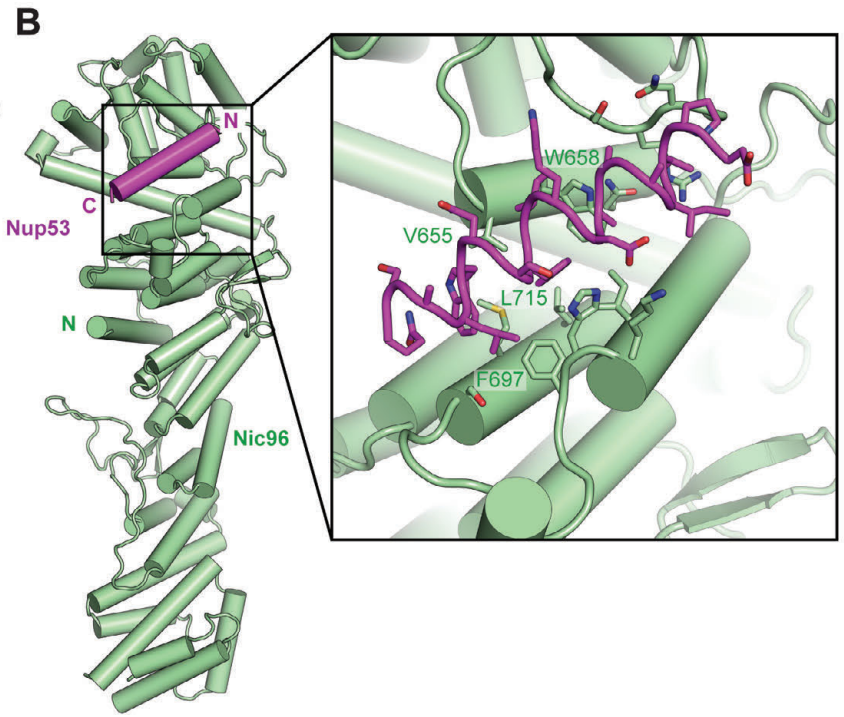

**Fig. S28.**

**Identification of Nic96<sup>SOL</sup> mutants that disrupt Nup53 binding.** (A) SEC interaction analysis between Nic96<sup>SOL</sup> mutants and SUMO-Nup53<sup>R2</sup>. SEC profiles are colored according to the effect on SUMO-Nup53<sup>R2</sup> binding; no effect (green), moderate effect (orange), or abolished binding (red). For reference, the SEC profile of the wild type Nic96<sup>SOL</sup>•SUMO-Nup53<sup>R2</sup> hetero-dimer (black) is shown. All SEC profiles were obtained using a Superdex 200 10/300 GL column. A gray bar indicates fractions that were resolved on SDS-PAGE gels and visualized by Coomassie staining. (B) The structure of Nic96<sup>SOL</sup>•Nup53<sup>R2</sup> is shown in cartoon representation. The inset illustrates the region that is expanded on the right with mutated residues labeled in green.



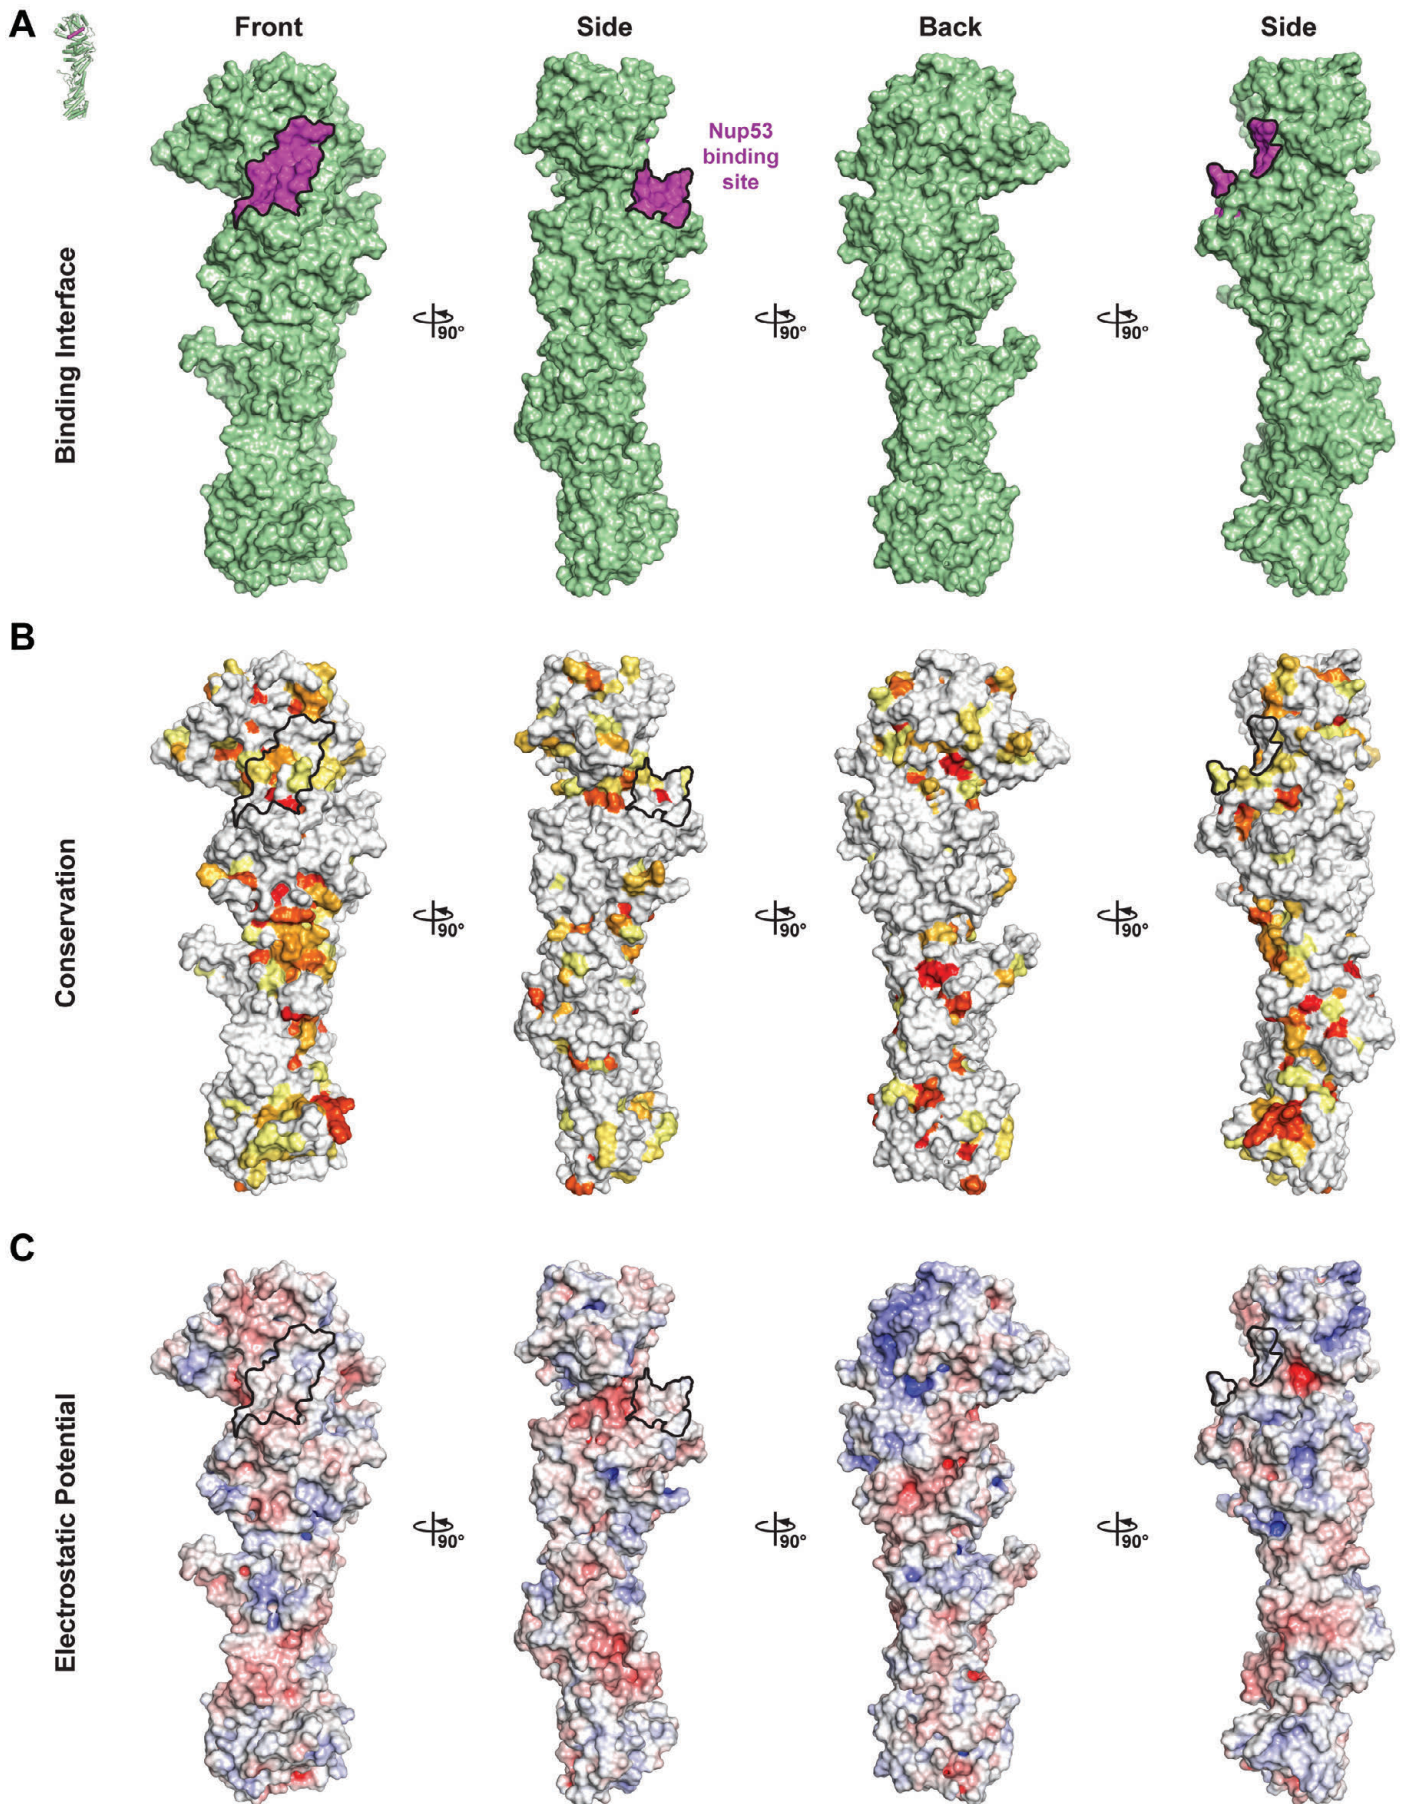

**Fig. S29.**

**Surface properties of Nic96<sup>SOL</sup>.** Surface representations of Nic96<sup>SOL</sup> are shown in four different orientations related by 90° rotations. The Nup53 binding interface is outlined in black. **(A)** Surface representation with the Nup53 binding site colored in purple. **(B)** Surface representation colored according to sequence identity based on the alignment in [fig. S27](#). **(C)** Surface representation colored according to electrostatic potential from -10  $k_B T/e$  (red) to +10  $k_B T/e$  (blue).







Nup192

- C.thermophilum
A.nidulans
N.crassa
P.pastoris
A.gossypii
S.cerevisiae
S.pombe
C.elegans
D.melanogaster
D.erio
X.laevis
H.sapiens

Table showing amino acid sequence for Nup192, residues 590-638. Helices alpha 26, alpha 27, and alpha 28 are indicated above the sequence.

- C.thermophilum
A.nidulans
N.crassa
P.pastoris
A.gossypii
S.cerevisiae
S.pombe
C.elegans
D.melanogaster
D.erio
X.laevis
H.sapiens

Table showing amino acid sequence for Nup192, residues 639-689. Helices alpha 29 and alpha 30 are indicated above the sequence.

- C.thermophilum
A.nidulans
N.crassa
P.pastoris
A.gossypii
S.cerevisiae
S.pombe
C.elegans
D.melanogaster
D.erio
X.laevis
H.sapiens

Table showing amino acid sequence for Nup192, residues 690-731. Helices alpha 31 and alpha 32 are indicated above the sequence.

- C.thermophilum
A.nidulans
N.crassa
P.pastoris
A.gossypii
S.cerevisiae
S.pombe
C.elegans
D.melanogaster
D.erio
X.laevis
H.sapiens

Table showing amino acid sequence for Nup192, residues 732-780. Helices alpha 33 and alpha 34 are indicated above the sequence.

- C.thermophilum
A.nidulans
N.crassa
P.pastoris
A.gossypii
S.cerevisiae
S.pombe
C.elegans
D.melanogaster
D.erio
X.laevis
H.sapiens

Table showing amino acid sequence for Nup192, residues 781-830. Helices alpha 34, alpha 35, and alpha 36 are indicated above the sequence.



Nup192

C.thermophilum
A.nidulans
N.crassa
P.pastoris
A.gossypii
S.cerevisiae
S.pombe
C.elegans
D.melanogaster
D.erio
X.laevis
H.sapiens

Sequence alignment for Nup192, residues 1019-1059. Helices alpha48 and alpha49 are highlighted in red. Conserved residues are in yellow.

C.thermophilum
A.nidulans
N.crassa
P.pastoris
A.gossypii
S.cerevisiae
S.pombe
C.elegans
D.melanogaster
D.erio
X.laevis
H.sapiens

Sequence alignment for Nup192, residues 1060-1107. Helices alpha50 and alpha51 are highlighted in red. Conserved residues are in yellow.

C.thermophilum
A.nidulans
N.crassa
P.pastoris
A.gossypii
S.cerevisiae
S.pombe
C.elegans
D.melanogaster
D.erio
X.laevis
H.sapiens

Sequence alignment for Nup192, residues 1108-1149. Helices alpha52 and alpha53 are highlighted in red. Conserved residues are in yellow.

C.thermophilum
A.nidulans
N.crassa
P.pastoris
A.gossypii
S.cerevisiae
S.pombe
C.elegans
D.melanogaster
D.erio
X.laevis
H.sapiens

Sequence alignment for Nup192, residues 1150-1200. Helices alpha54, alpha55, and beta3 are highlighted in red. Conserved residues are in yellow.

C.thermophilum
A.nidulans
N.crassa
P.pastoris
A.gossypii
S.cerevisiae
S.pombe
C.elegans
D.melanogaster
D.erio
X.laevis
H.sapiens

Sequence alignment for Nup192, residues 1201-1216. Helices beta4 and alpha56 are highlighted in red. Conserved residues are in yellow.











**Fig. S30.**

**Multispecies sequence alignment of Nup192.** Sequences from twelve diverse species were aligned and colored by sequence similarity according to the BLOSUM62 matrix from white (less than 55 % similarity), to yellow (55 % similarity), to red (100 % identity). Numbering below alignment is relative to the *C. thermophilum* sequence. Secondary structure observed in the Nup192 structure is shown above the alignment:  $\alpha$ -helices (red bars),  $\beta$ -sheets (blue bars), and unstructured regions (black lines). A dashed line indicates the loop that was deleted for crystallization. Disordered regions are indicated by gray dots.

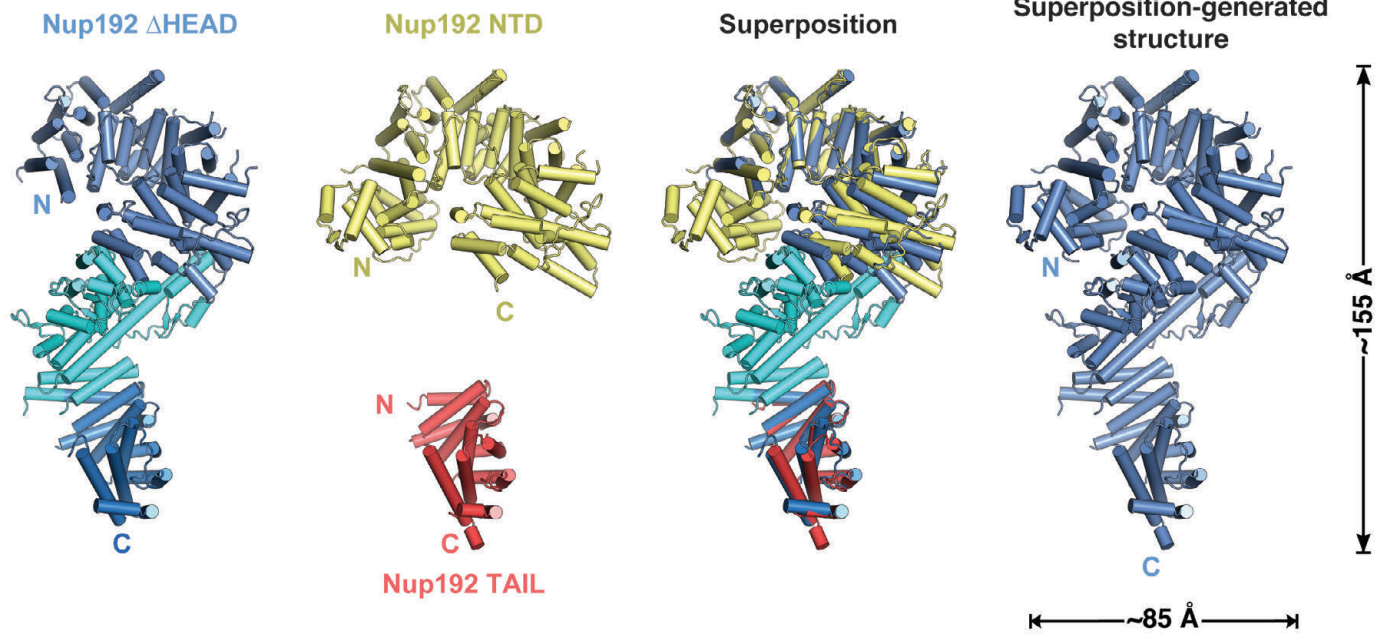

**Fig. S31.**

**Superposition-generated structure of full-length Nup192.** Cartoon representations of the crystal structures of Nup192<sup>ΔHEAD</sup> (colored as in [Fig. 4F](#)), Nup192<sup>NTD</sup> (yellow), and Nup192<sup>TAIL</sup> (red) and their superposition are shown. A cartoon representation of the superposition-generated structure of full-length Nup192 (blue) generated from the superposition is shown on the right. See also [Movie 4](#).

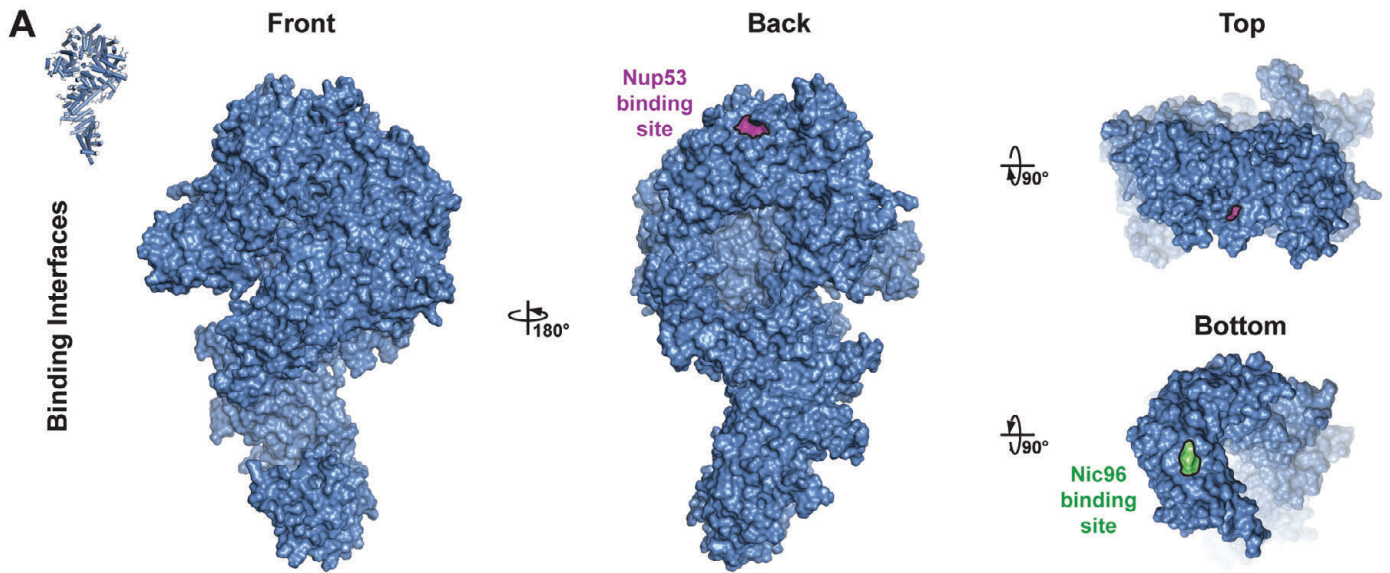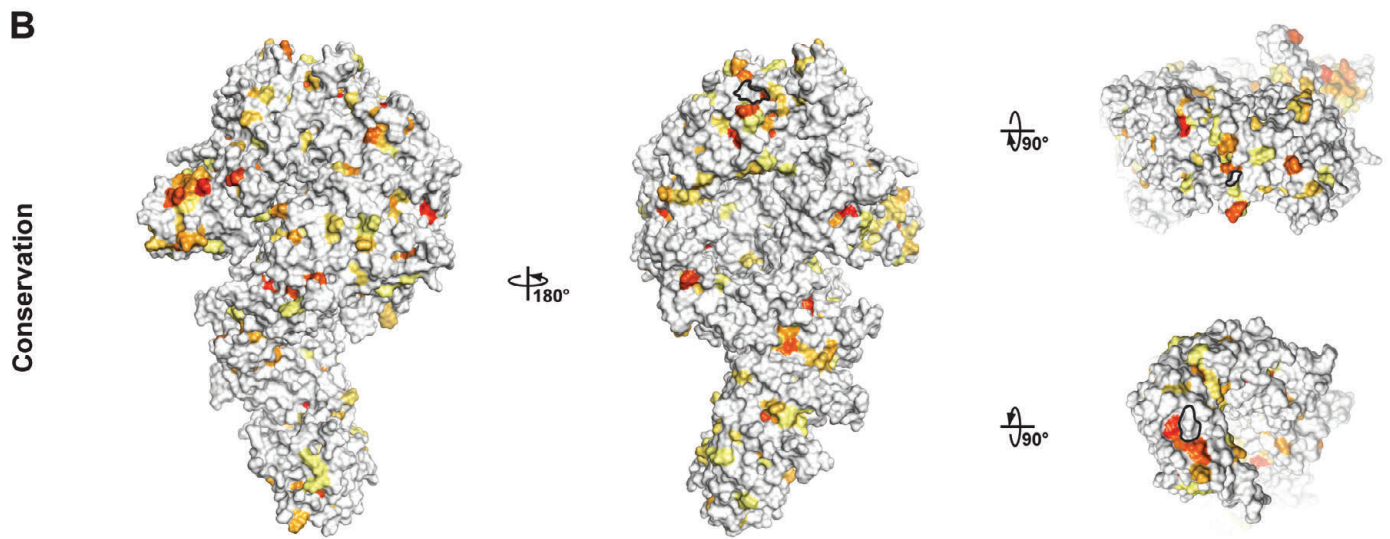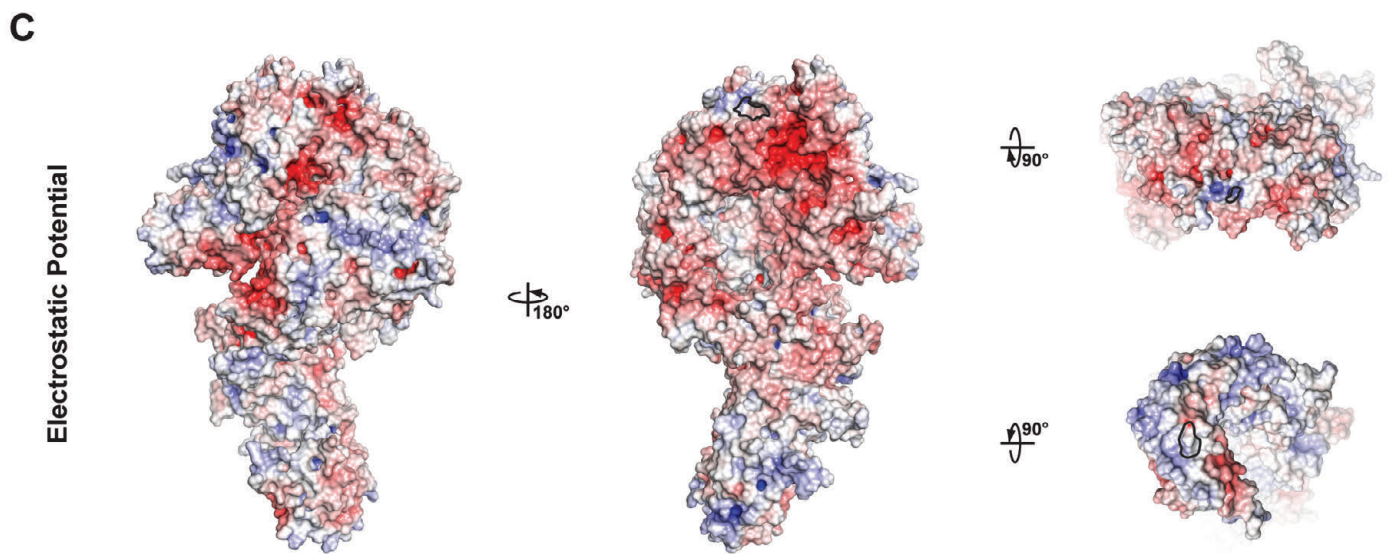



**Fig. S32.**

**Surface properties of Nup192.** Surface representations of Nup192 are shown in four different orientations. The surfaces corresponding to previously identified point mutations that disrupt interactions with Nup53 or Nic96 are outlined in black. **(A)** A surface representation of Nup192 with previously identified point mutations that disrupt interactions with Nup53 or Nic96 colored purple or green, respectively (15, 20). **(B)** Surface representation colored according to sequence identity based on the alignment in [fig. S30](#). **(C)** Surface representation colored according to electrostatic potential from  $-10 k_B T/e$  (red) to  $+10 k_B T/e$  (blue).

Coat nups

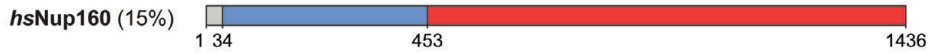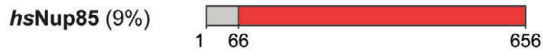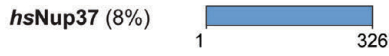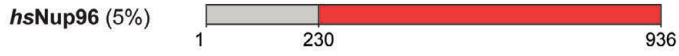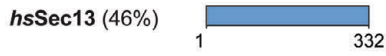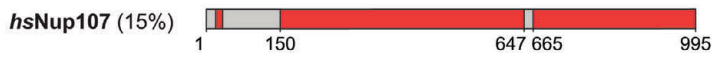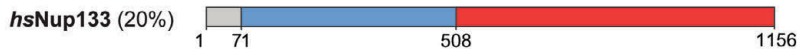

Adaptor nups

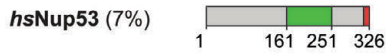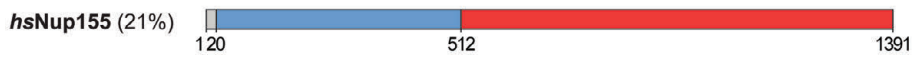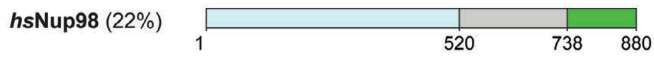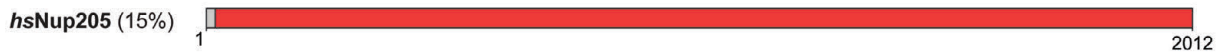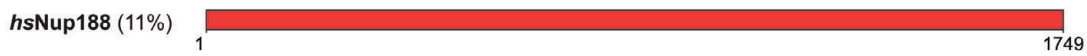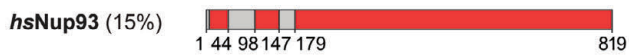

Channel nups

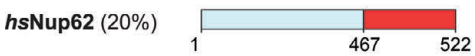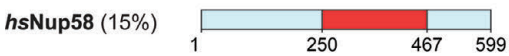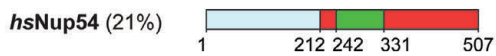

**Fig. S33.**

**Domain structures of symmetric core nucleoporins are conserved between *H. sapiens* and *C. thermophilum*.** Predicted domain boundaries are shown for the symmetric core nucleoporins from *H. sapiens* using *H. sapiens* nomenclature. Percent sequence identity to *C. thermophilum* is shown in parenthesis.

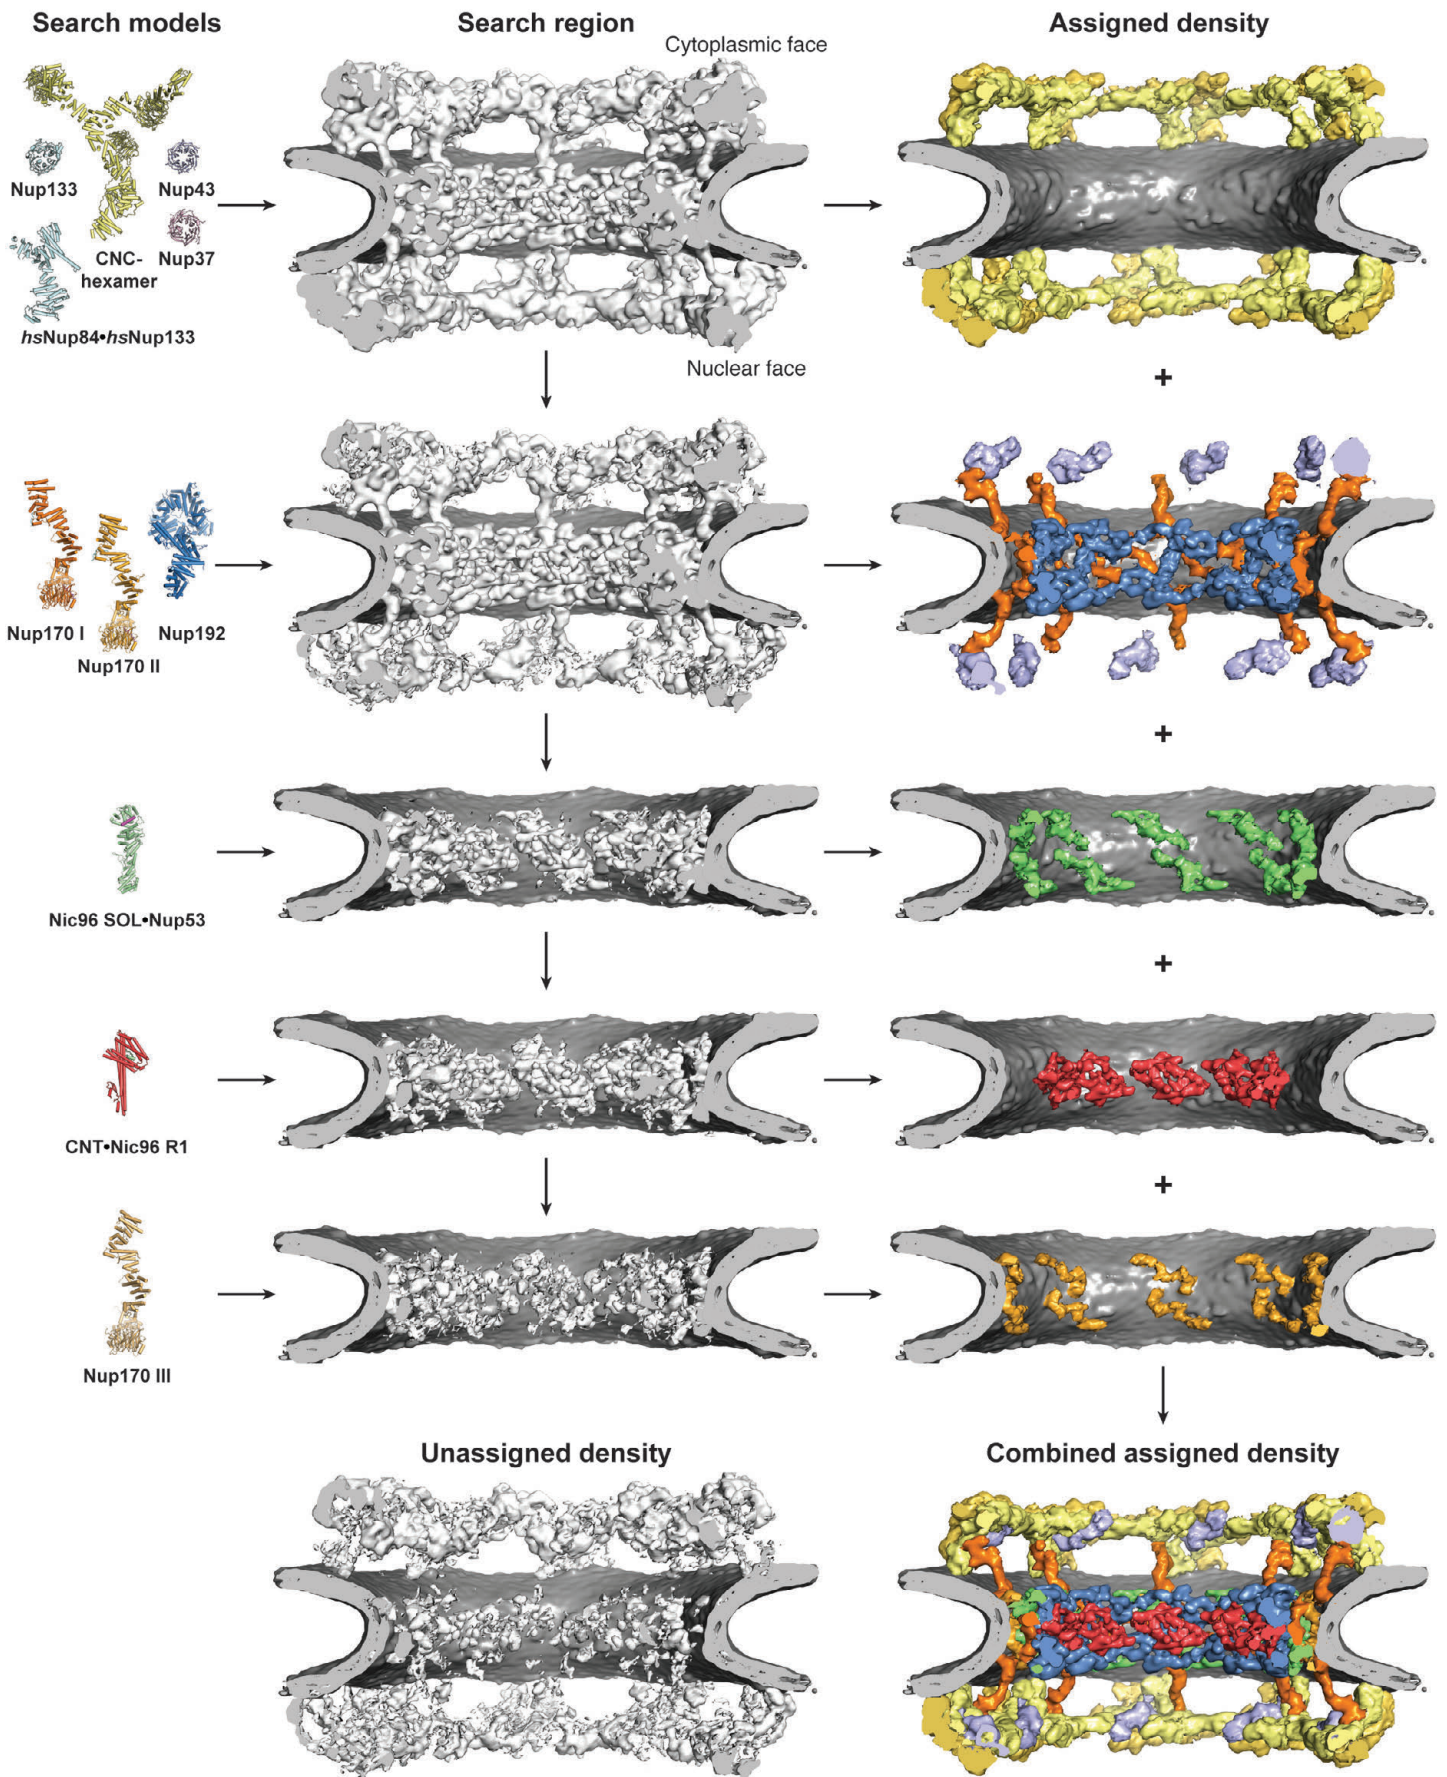

**Fig. S34.**

**Flowchart of the incremental approach used to dock crystal structures into the cryoET reconstruction of the intact human NPC.** For each docking step, the crystal structures used for global searches are shown on the left (search model) and the cryoET reconstruction the searches were performed with is shown in the middle (search region). Newly assigned density that was removed from the cryoET reconstruction in subsequent searches is shown on the right and colored as the crystal structure that was placed (assigned density). The remaining unassigned density and combined assigned density are shown at the bottom middle and right, respectively.

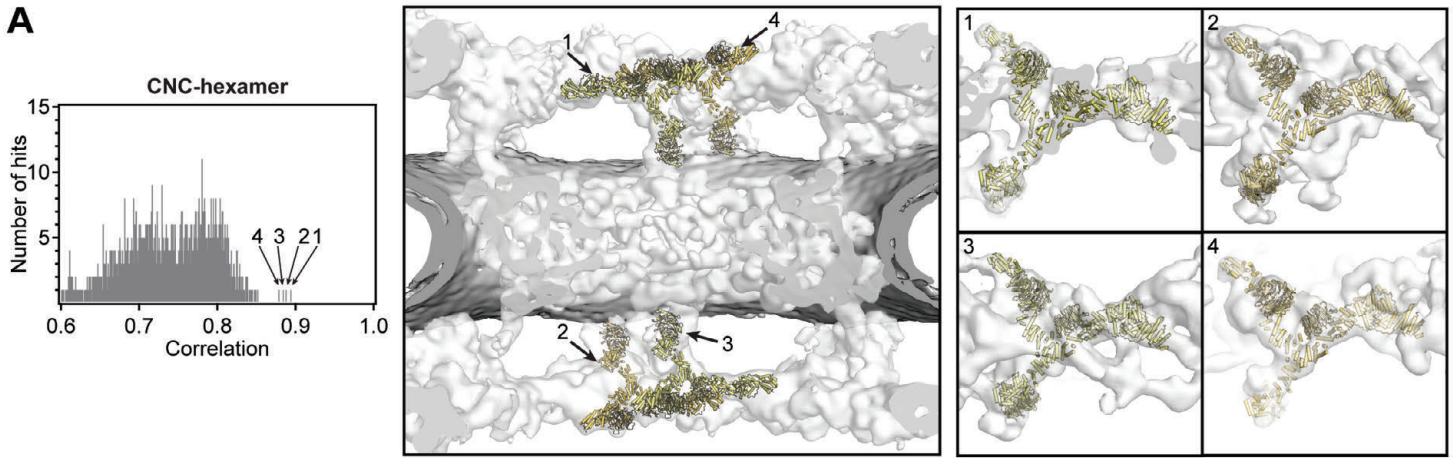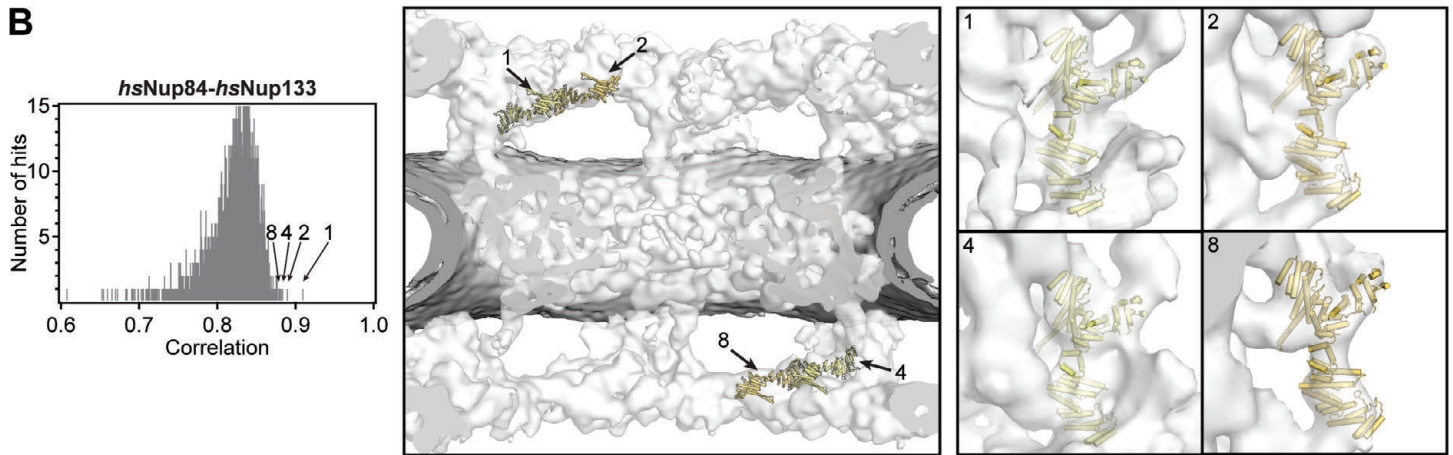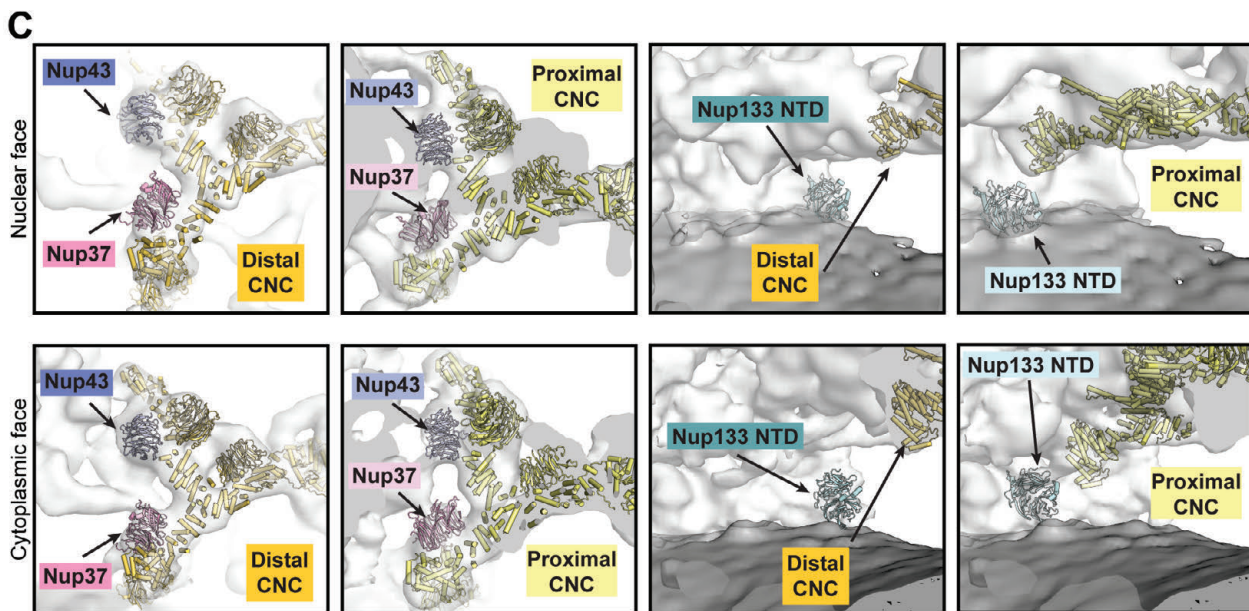

**Fig. S35.**

**Docking of the CNC-hexamer and Nup84•Nup133 crystal structures into the cryoET reconstruction of the intact human NPC.** On the left, histograms of the cross-correlation scores from a global search with 50,000 random initial placements are shown for (A) the yeast CNC-hexamer (PDB ID 4XMM) and (B) *hsNup84•hsNup133* hetero-dimer (PDB ID 3I4R) (14, 23). Arrows and corresponding numbers indicate the unique solutions that were accepted and the rank of the score, respectively. The arrangement of the unique solutions in one spoke is shown in the middle. The densities corresponding to the nuclear envelope and the NPC are colored in dark gray and white, respectively. Representative views illustrating the quality of the fits are shown on the right. The numbers on the top left of the box indicate which solution is depicted. (C) Manual docking of Nup43 (PDB ID 4I79; periwinkle), Nup37 (PDB ID 4FHM; pink), and Nup133<sup>NTD</sup> (PDB ID 1XKS; turquoise)  $\beta$ -propellers into cryoET density guided by previously published biochemical and structural data (39-41, 63).

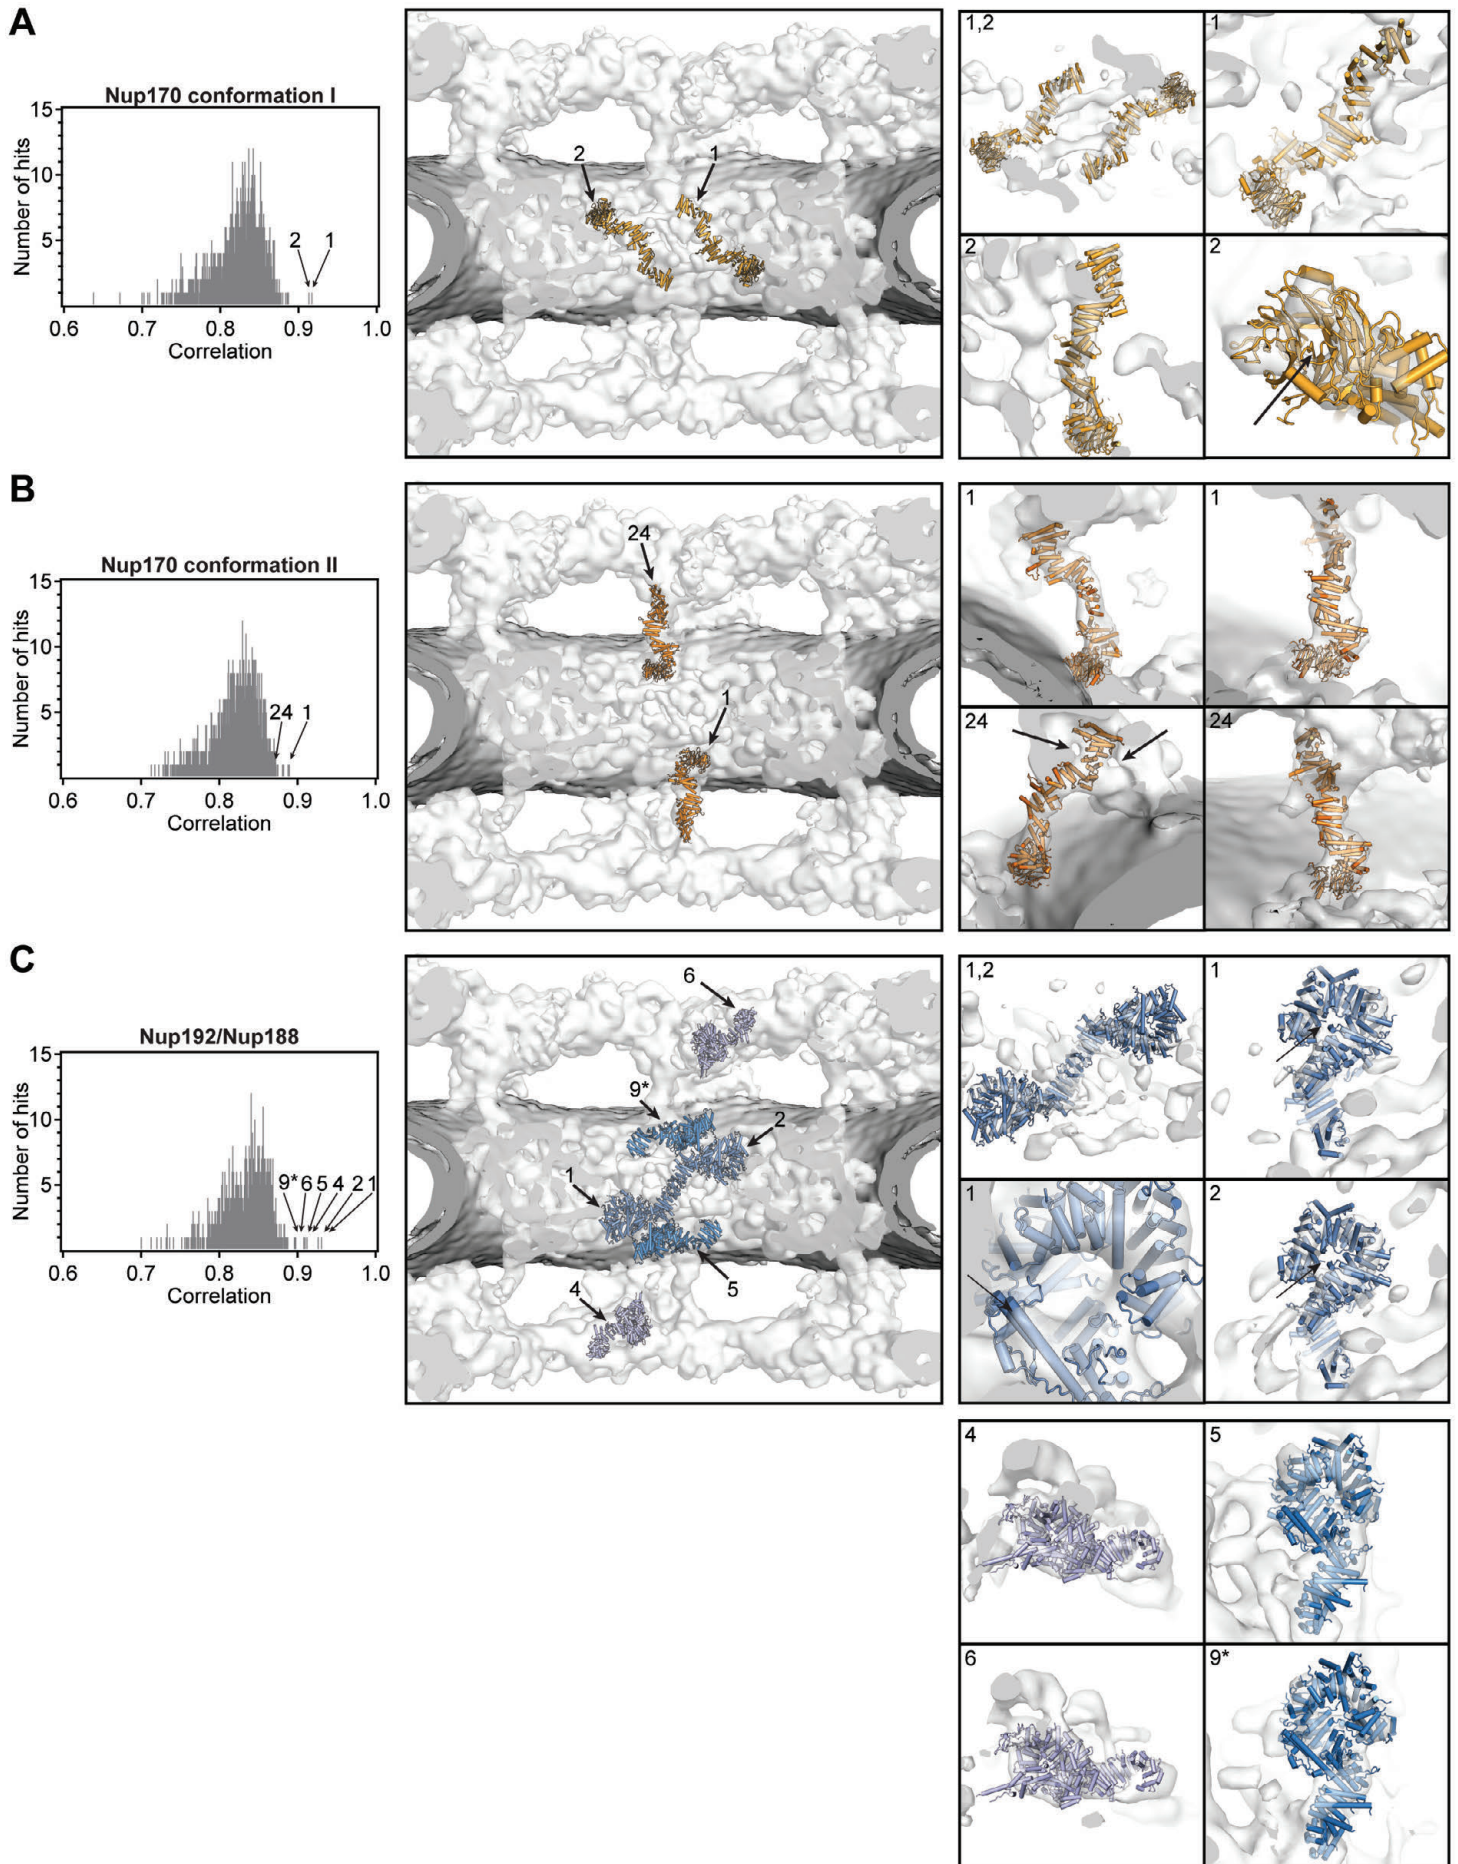



**Fig. S36.**

**Docking of the superposition-generated full-length Nup170 and Nup192 structures into the cryoET reconstruction of the intact human NPC.** On the left, histograms of the cross-correlation scores from a global search with 50,000 random initial placements are shown for (A) Nup170 conformation I (light orange), (B) Nup170 conformation II (dark orange), and (C) Nup192 (blue), Nup188 (purple). The Nup170 conformations I and II correspond to conformations 5 and 2, respectively, in [fig. S25](#). Arrows and corresponding numbers indicate the unique solutions that were accepted and the rank of the score, respectively. For Nup192, we accepted 5 placements from the global search results, two placements in the inner ring, two placements in the outer rings, and one placement on the nuclear peripheral side of the inner ring. A matching cytoplasmic peripheral placement was not found in global searches, but the manual placement on the cytoplasmic peripheral side of the inner ring generated a score which would rank as the 9<sup>th</sup> highest score (asterisk). The arrangement of the unique solutions in one spoke is shown in the middle. The densities corresponding to the nuclear envelope and the NPC are colored in dark gray and white, respectively. Representative views illustrating the quality of the fits are shown on the right. The numbers on the top left of the box indicate which solution is depicted.

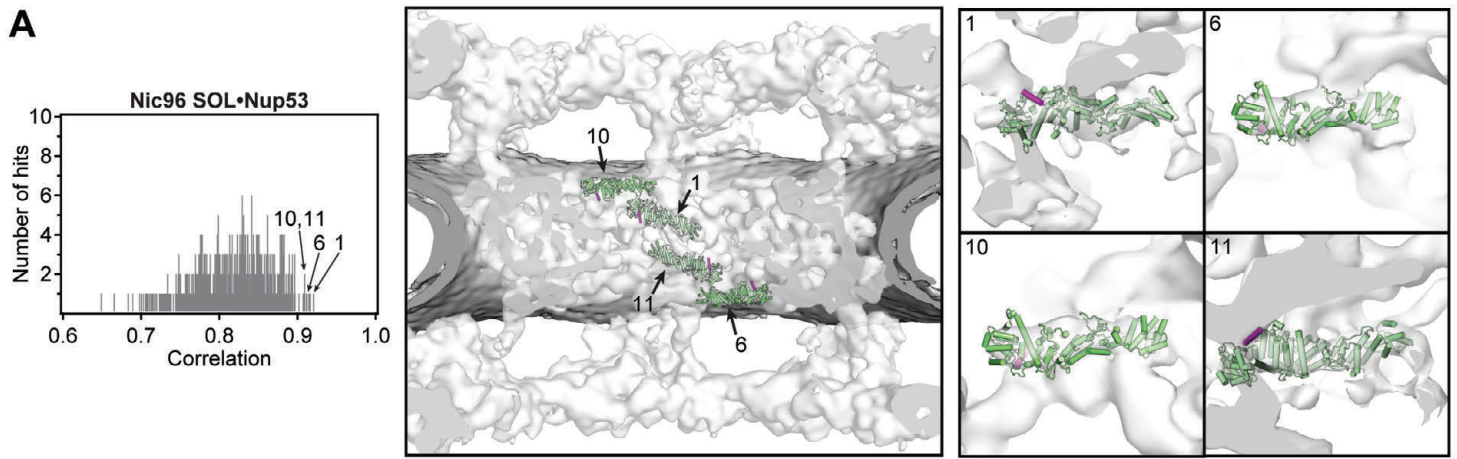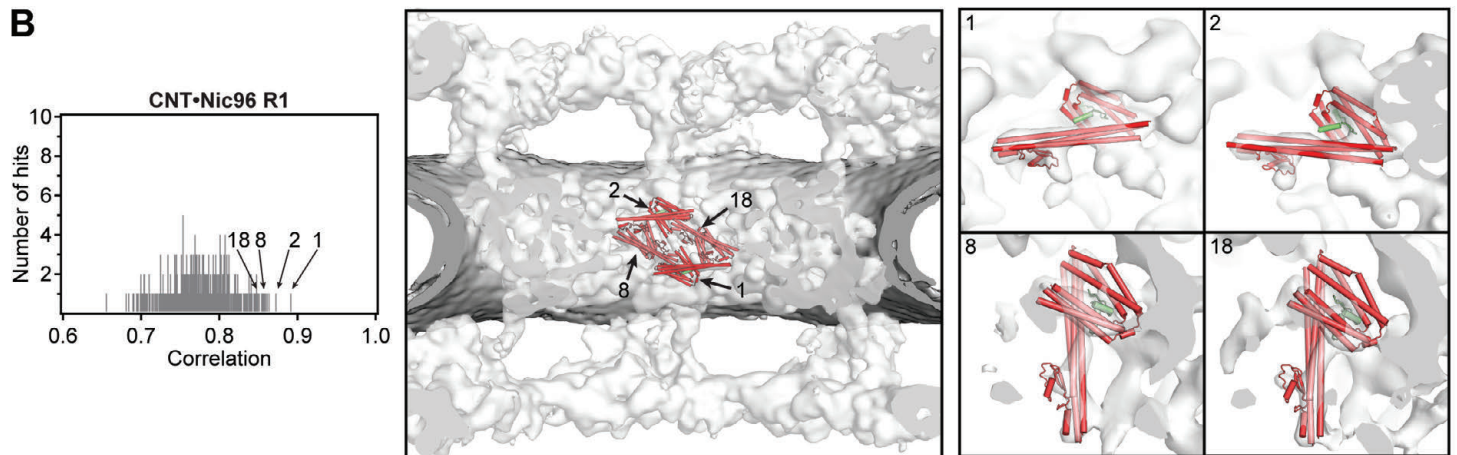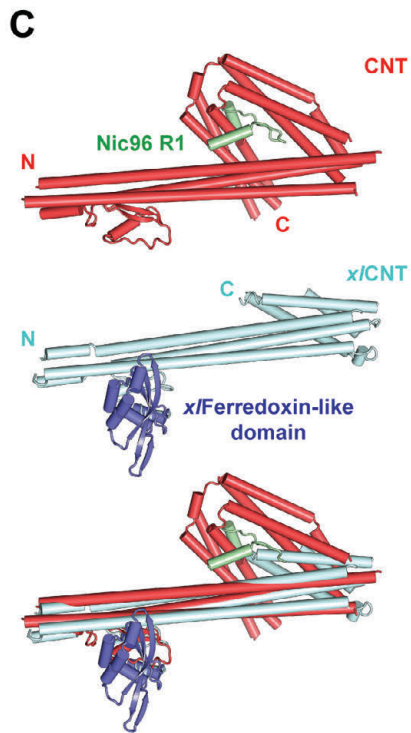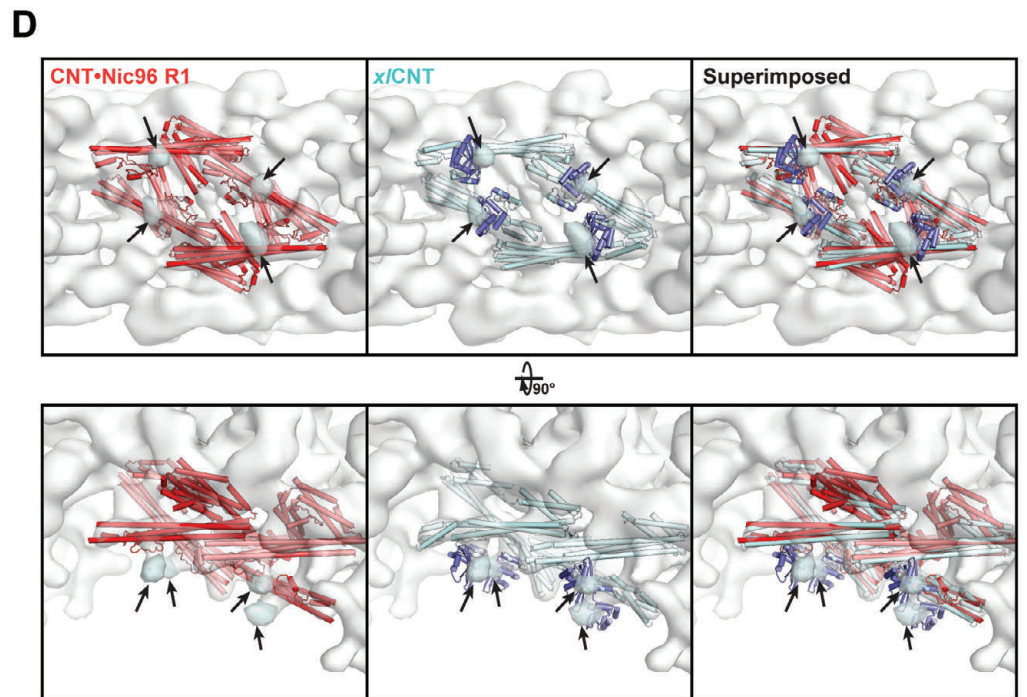

**Fig. S37.**

**Docking of Nic96<sup>SOL</sup> and CNT crystal structures into the cryoET reconstruction of the intact human NPC.** On the left, histograms of the cross-correlation scores from a global search with 50,000 random initial placements are shown for **(A)** Nic96<sup>SOL</sup>•Nup53<sup>R2</sup> (green) and **(B)** CNT•Nic96<sup>R1</sup> (PDB 5CWS; red). Arrows and corresponding numbers indicate the unique solutions that were accepted and the rank of the score, respectively. The arrangement of the unique solutions in one spoke is shown in the middle. The densities corresponding to the nuclear envelope and the NPC are colored in dark gray and white, respectively. Representative views illustrating the quality of the fits are shown on the right. The numbers on the top left of the box indicate which solution is depicted. **(C)** Crystal structures of the *C. thermophilum* CNT•Nic96<sup>R1</sup> hetero-tetramer (PDB ID 5CWS; red and green; top), the *X. laevis* CNT hetero-trimer (PDB ID 5C3L; light cyan; middle) and ferredoxin-like domain (PDB ID 5C2U; purple; middle), and their superposition (bottom) are shown in cartoon representation (15, 16). **(D)** The four knobs of unexplained density directly adjacent to the docked CNT•Nic96<sup>R1</sup> crystal structures (colored in cyan and marked with arrows) are readily explained by the presence of the ferredoxin-like domain, a metazoan-specific insertion in Nup57. Side views from within the central transport channel of the NPC (top) and top views from the cytoplasm (bottom) are shown of the cryoET reconstruction with the docked CNT•Nic96<sup>R1</sup> crystal structures (left), the model of *X. laevis* CNT with ferredoxin-like domain (middle), and their superposition (right).

**A**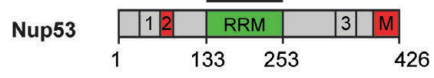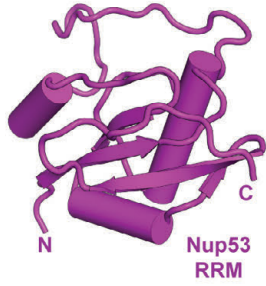

Nup53 RRM

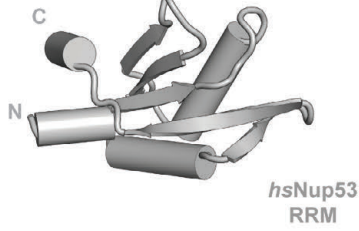*hsNup53* RRM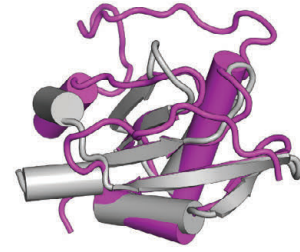

Superposition

**B**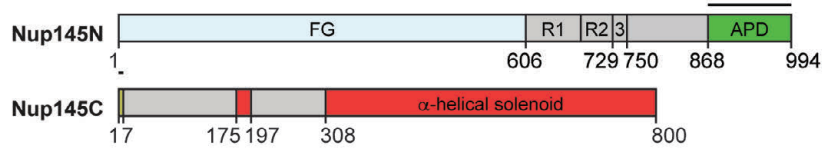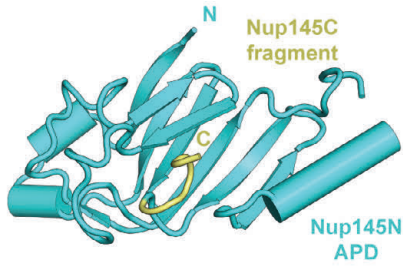

Nup145N APD

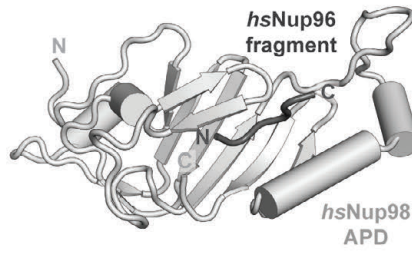*hsNup98* APD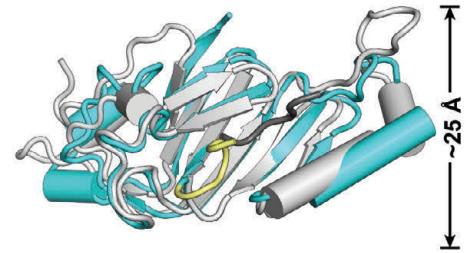

Superposition

**Fig. S38.**

**Crystal structures of Nup53<sup>RRM</sup> and Nup145N<sup>APD</sup>•Nup145C<sup>N</sup>.** (A) Crystal structures of *C. thermophilum* Nup53<sup>RRM</sup> (purple), *H. Sapiens* Nup53<sup>RRM</sup> (PDB ID 4LIR; gray), and their superposition are shown in cartoon representation. The core fold is conserved, but there are minor alterations in the size of helices and loops. (B) Crystal structures of the *C. thermophilum* Nup145N<sup>APD</sup>•Nup145C<sup>N</sup> complex (cyan), the *H. sapiens* Nup98<sup>APD</sup>•Nup96<sup>N</sup> complex (PDB ID 1KO6; light gray), and their superposition are shown in cartoon representation. As previously observed for the *hsNup98*<sup>APD</sup>•*hsNup96*<sup>N</sup> hetero-dimer, fusion of the Nup145C<sup>N</sup> peptide to Nup145N<sup>APD</sup> and introduction of the catalytically inactive T994A mutation allowed for structure determination of the Nup145N<sup>APD</sup>•Nup145C<sup>N</sup> complex. Nup145C<sup>N</sup> occupied the same binding groove as previously observed in the *hsNup98*•*hsNup96* complex (30). As references, the domain structures of Nup53, Nup145N, and Nup145C are shown above the crystal structures with black bars indicating the crystallized fragments.

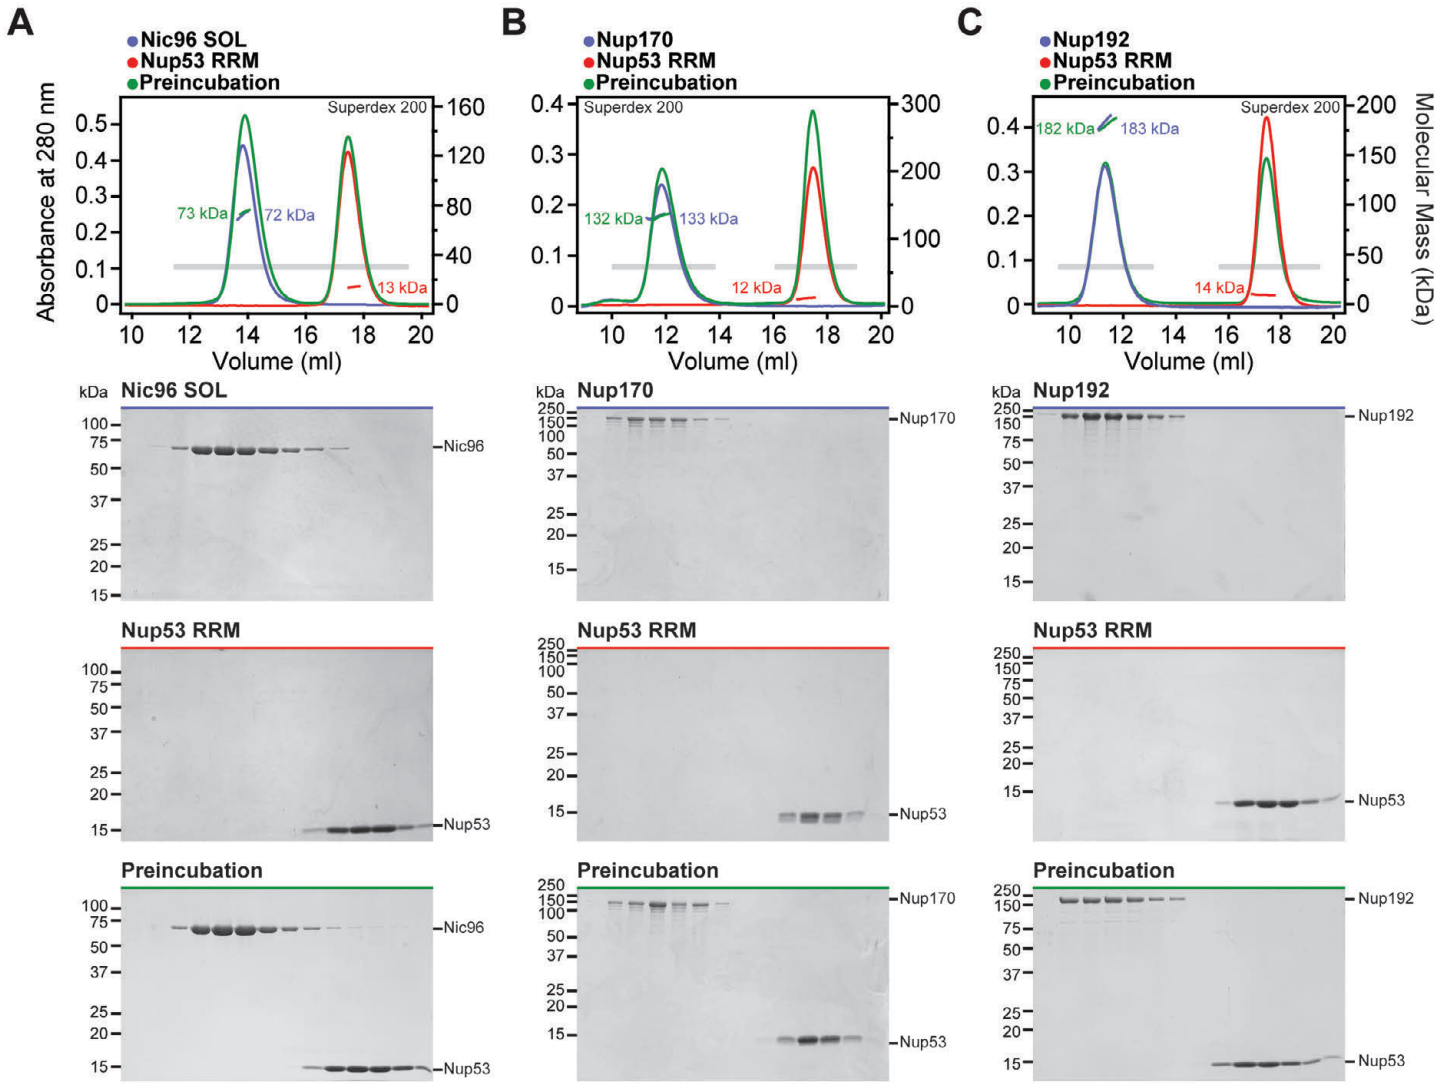

**D**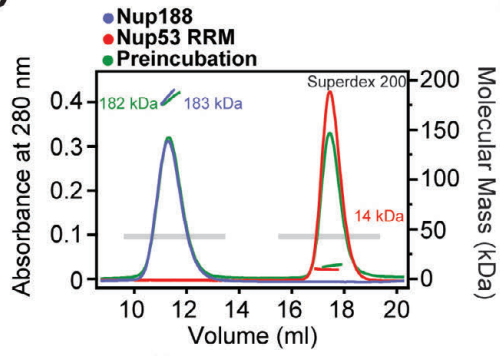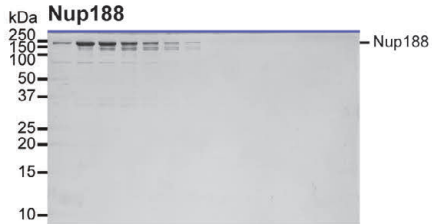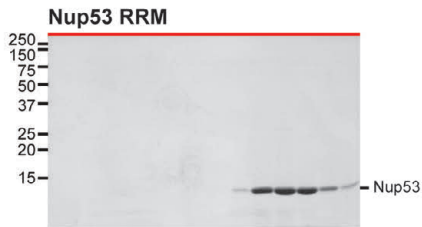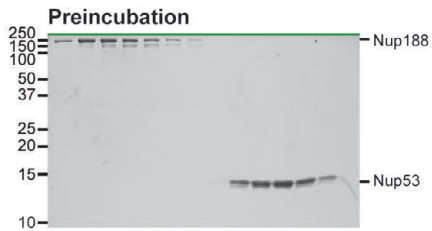**E**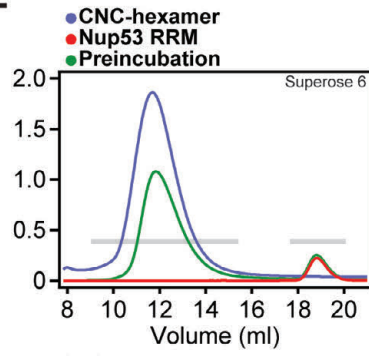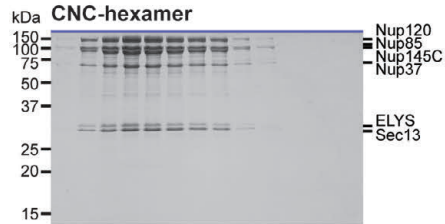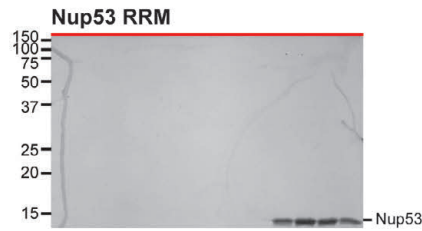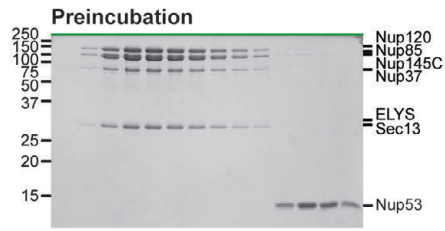

**Fig. S39.**

**Nup53<sup>RRM</sup> does not interact with inner ring scaffold nucleoporins or the CNC-hexamer.** (A-E) SEC-MALS profiles of nucleoporins or nucleoporin complexes are shown individually (blue and red) and after their preincubation (green). SEC profiles were obtained using a Superdex 200 10/300 column or Superose 6 10/300 column as indicated. Measured molecular masses are indicated for the peak fractions. Gray bars indicate fractions that were resolved on SDS-PAGE gels and visualized by Coomassie staining.



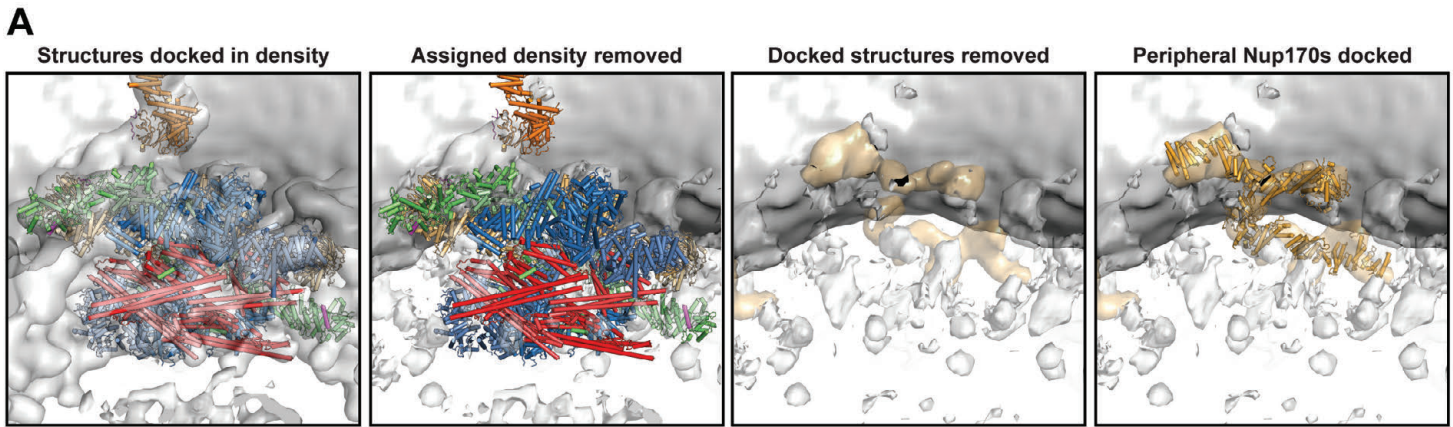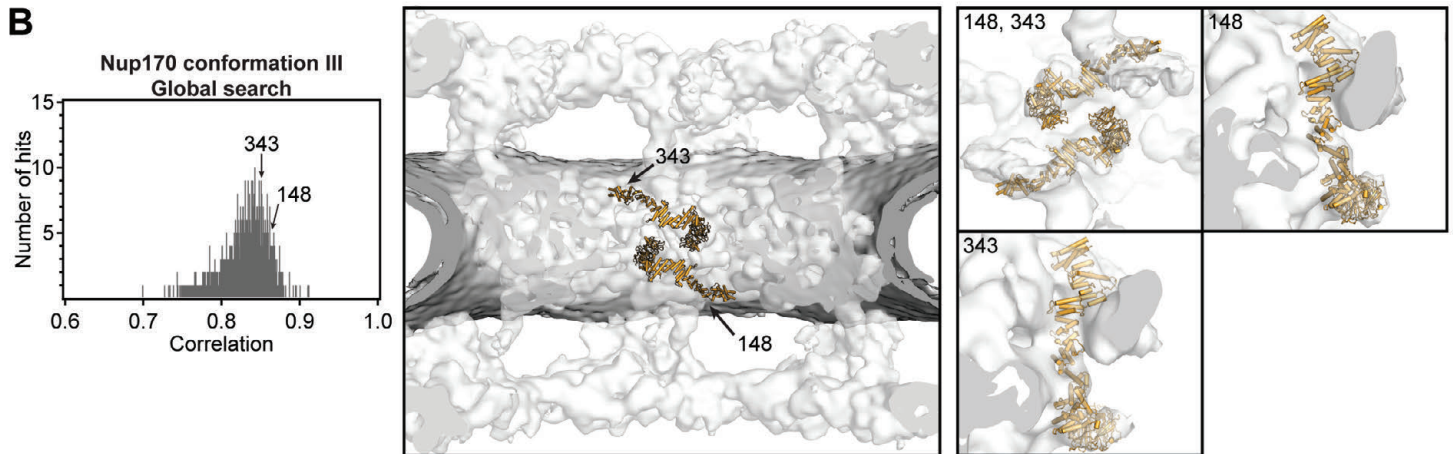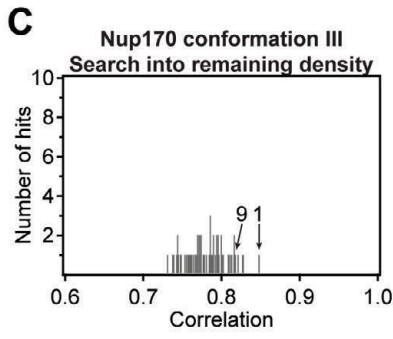

**Fig. S40.**

**Identification of a third pair of Nup170 molecules in the inner ring of the cryoET reconstruction of the intact human NPC.** (A) Views of the cryoET density in the inner ring illustrating all density and the docked proteins from the unbiased search (far left), the cryoET density remaining after removal of the assigned density and the docked proteins (middle left), the remaining cryoET density without the docked proteins from the unbiased search revealing density that is shaped like a Nup170 molecule colored in orange (middle right), and the same density with a third conformation of Nup170 docked (far right). (B) Search results for two additional Nup170 molecules fitted into a cryoET map from which the density for the CNCs had been removed. The histogram on the left shows the cross-correlation scores for a pair of Nup170 conformation III (light orange) from a global search with 50,000 random initial placements. Nup170 conformation III corresponds to conformation 8 in [fig. S25](#). Arrows and corresponding numbers indicate the unique solutions that were accepted and the rank of the score, respectively. The arrangement of the unique solutions in one spoke is shown in the middle. The densities corresponding to the nuclear envelope and the NPC are colored in dark gray and white, respectively. Representative views illustrating the quality of the fits are shown on the right. The numbers on the top left of the box indicate which solution is depicted. (C) A histogram illustrating the search results for fitting Nup170 conformation III into a cryoET map of the inner ring from which the density corresponding to all other components had been removed.

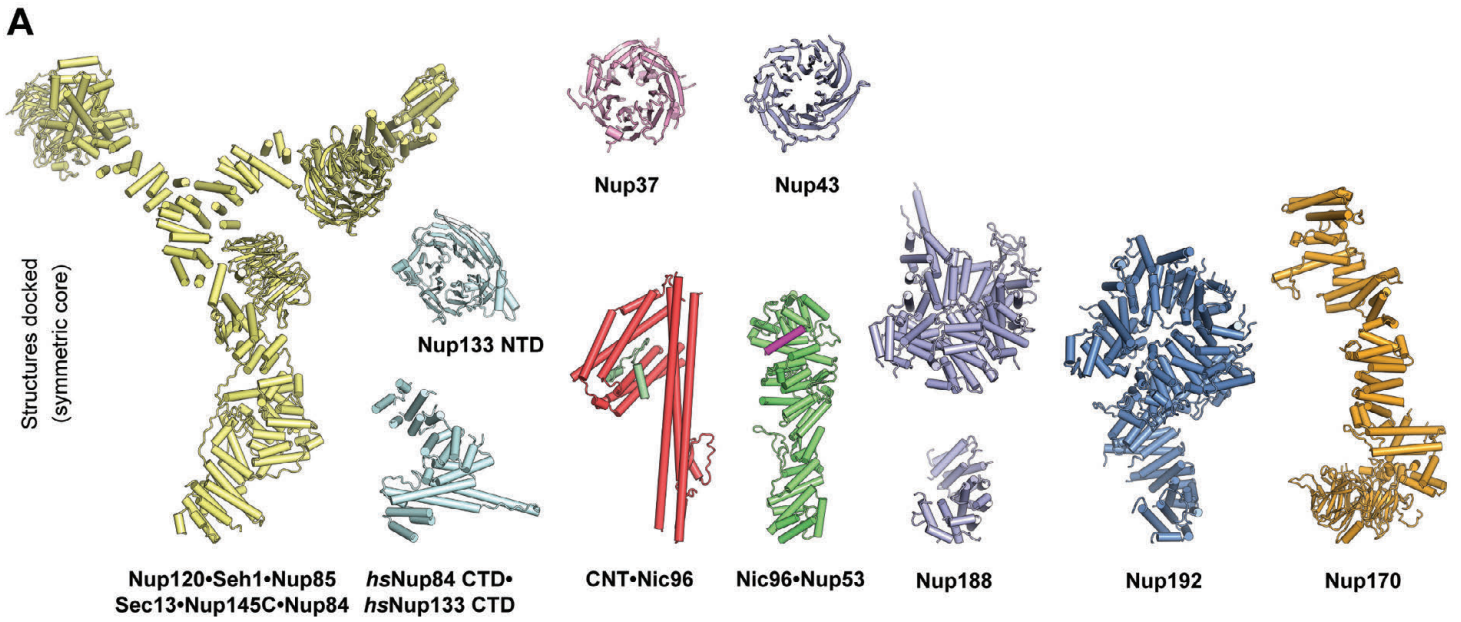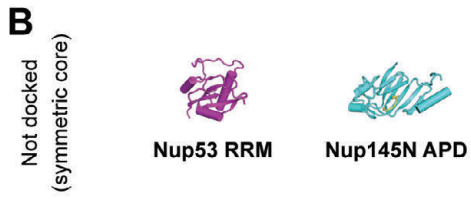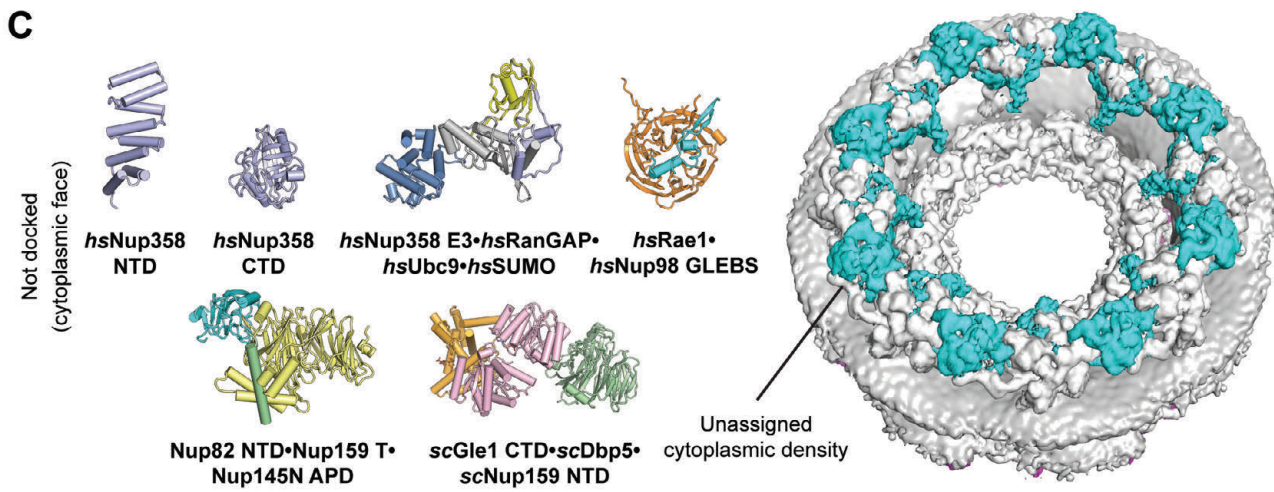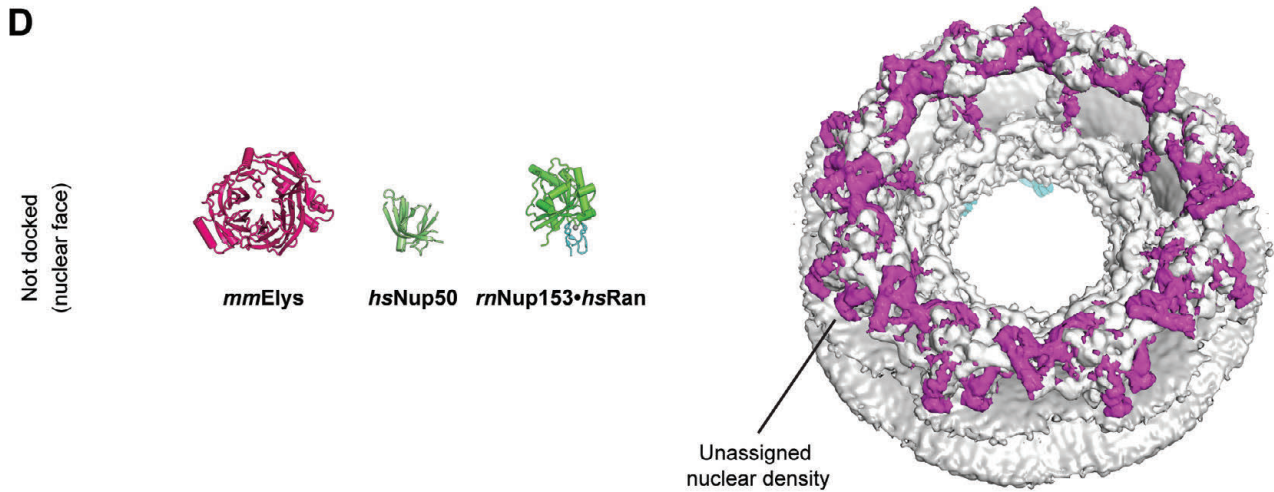

**Fig. S41.**

**Summary of crystal structure docking into the cryoET reconstruction of the intact human NPC.**

(A) Crystal structures of the symmetric core nucleoporins that could be successfully docked into a cryoET reconstruction of the intact human NPC. (B-D) Crystal structures of symmetric core nucleoporin domains, the cytoplasmic filament nucleoporins, and nuclear basket nucleoporins, which were not docked due to their small size, indistinctive shape, or lack of biochemical restraints. Cytoplasmic and nuclear views of the cryoET reconstruction of the intact human NPC are shown on the right. The assigned density of the symmetric NPC core is colored in gray and the unassigned densities on the cytoplasmic and nuclear faces are colored in cyan and purple, respectively. The volume of the unassigned density appears to be sufficient to accommodate the majority of the remaining structured protein mass of the asymmetric cytoplasmic filament and nuclear basket nucleoporins. All crystal structures are shown to scale in cartoon representation.

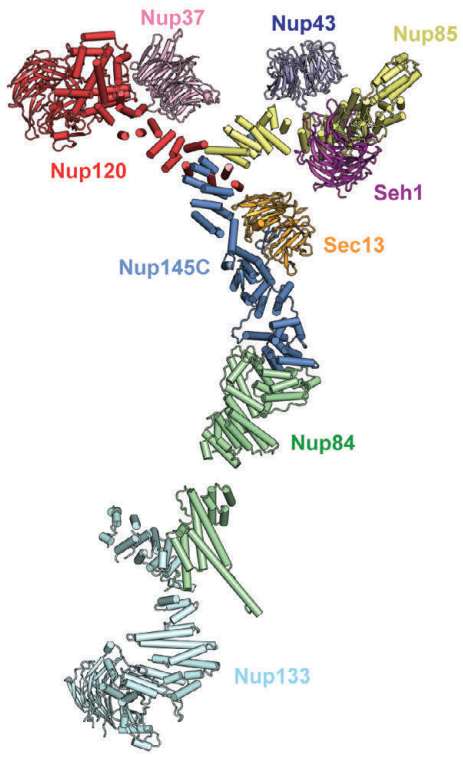

**Proximal CNC**

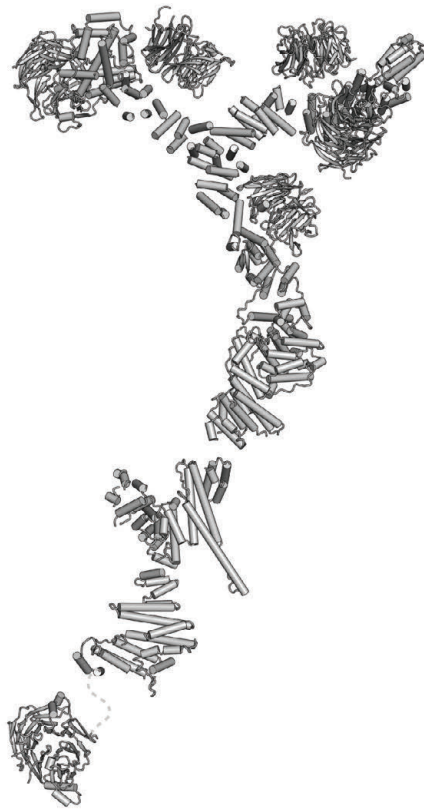

**Distal CNC**

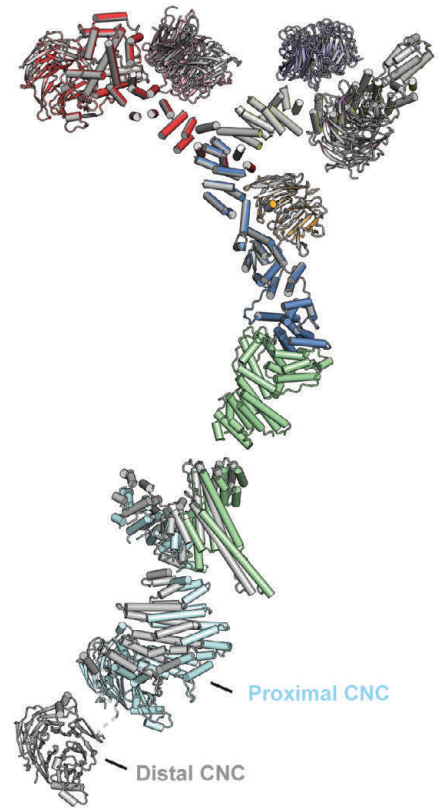

**Superposition**

**Fig. S42.**

**Comparison of the distal and proximal CNC docking solutions.** Individual distal (multicolored; left) and proximal (gray; middle) CNCs are shown in cartoon representation. Their superposition reveals a dramatically different orientation for Nup133<sup>NTD</sup> and slightly different orientations of the Nup133 and Nup84 solenoids (right).

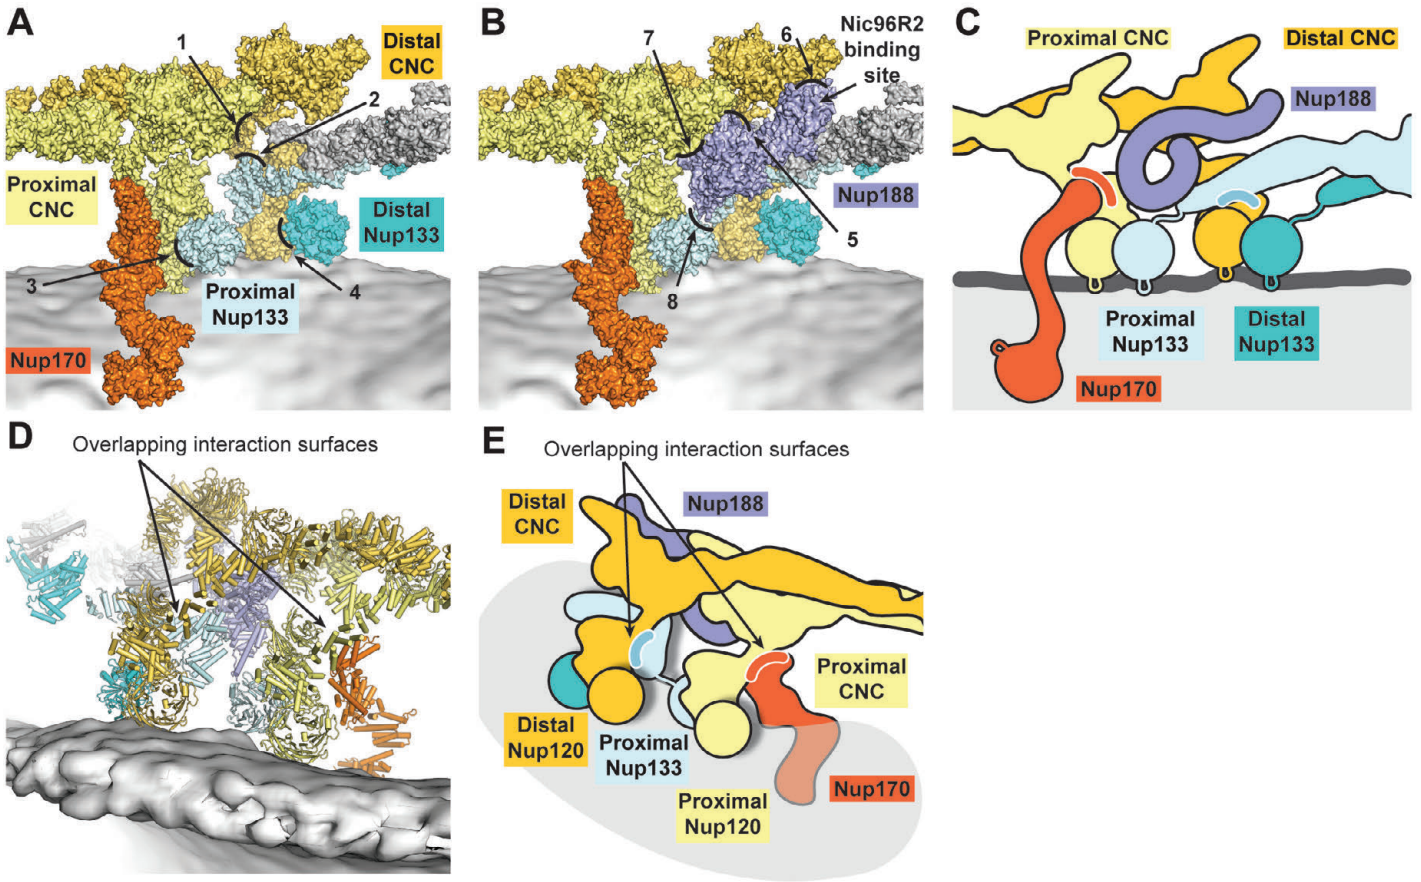

**Fig. S43.**

**Interactions mediating inter-spoke assembly.** (A) The outer ring inter-spoke interface is shown in surface representation, but with Nup188 removed for clarity. Contacts observed between CNCs from different spokes are indicated by arrows and numbered from 1 to 4, corresponding to the contacts described in the text. (B) The same view as in panel (A), but with Nup188 also shown in a surface representation. Contacts observed between Nup188 and the CNCs at the inter-spoke interface are indicated by arrows and numbered from 5 to 8, corresponding to the contacts described in the text. An arrow highlights the Nic96<sup>R2</sup> binding site on Nup188. (C) Schematic of the inter-spoke interface, from the same view as in panel (A). (D) The outer ring inter-spoke interface, shown in cartoon representation, ~180° rotated from the view in panel (A). Nup170 and Nup133 contact overlapping interfaces on proximal and distal Nup120 molecules. (E) Schematic of the outer ring inter-spoke interface drawn in the same view as in panel (D).



**A**

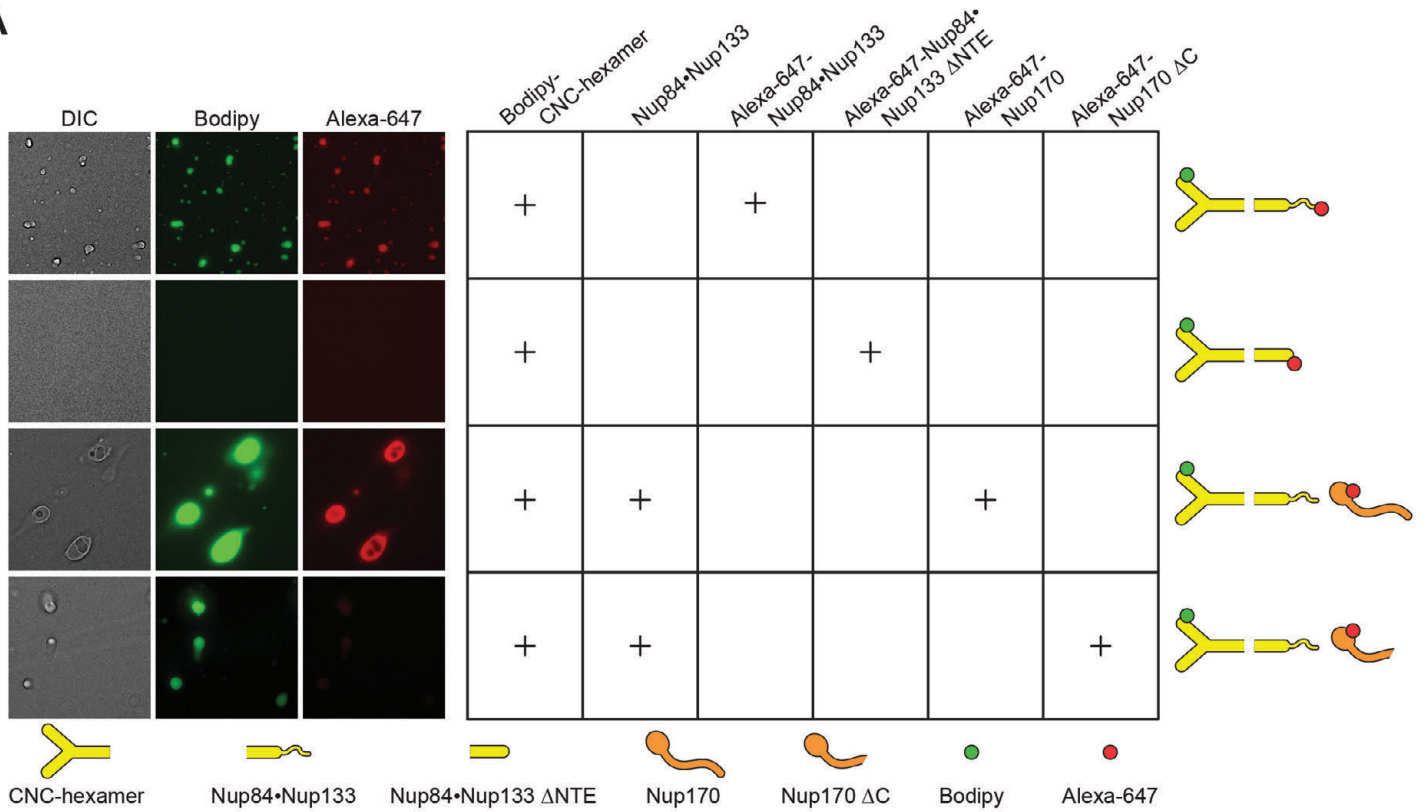

**B**

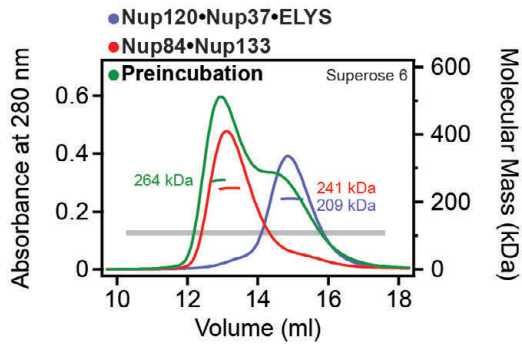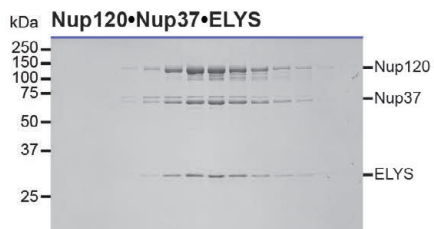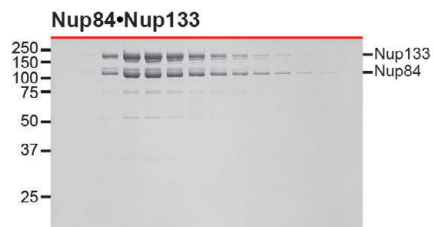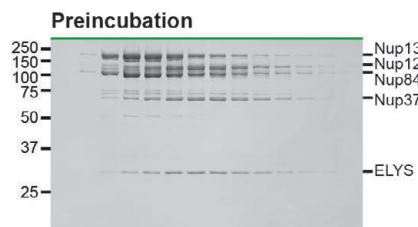

**C**

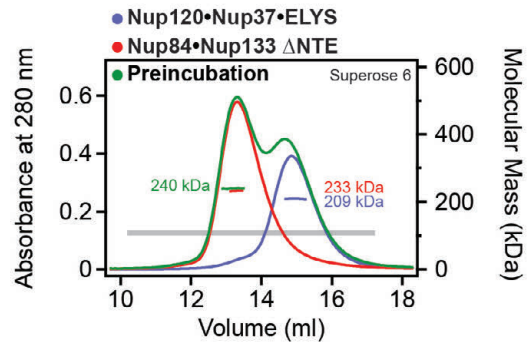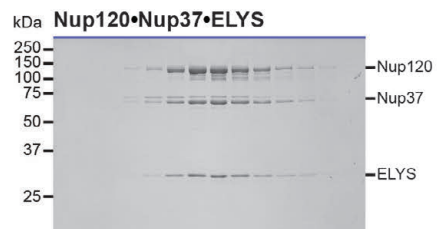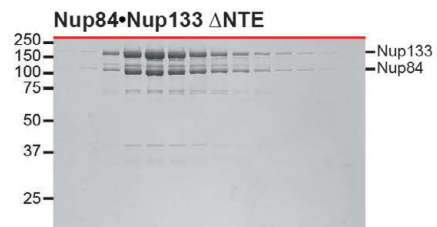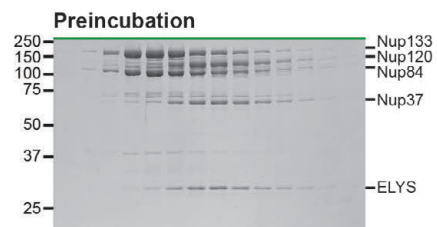

**Fig. S44.**

**Oligomerization of the CNC.** (A) The CNC forms oil droplets in the presence of the unstructured N-terminal extension (NTE) of Nup133. The CNC-hexamer was labeled with Bodipy and various other nucleoporins were labeled with Alexa-647 and tested for their ability to form oil droplets. Nup170 incorporates CNC oil droplets, but this incorporation is ablated by deletion of C-terminal helices. Tested protein combinations are indicated in the table and shown schematically on the right. All experiments were repeated at least three times. (B, C) SEC-MALS profiles of nucleoporin complexes are shown individually (blue or red) and after their preincubation (green). There is a weak interaction between Nup120•Nup37•ELYS and Nup84•Nup133 only in the presence of the NTE of Nup133. SEC profiles were obtained using a Superose 6 10/300 GL column. Measured molecular masses are indicated for the peak fractions. Gray bars indicate fractions that were resolved on SDS-PAGE gels and visualized by Coomassie staining.

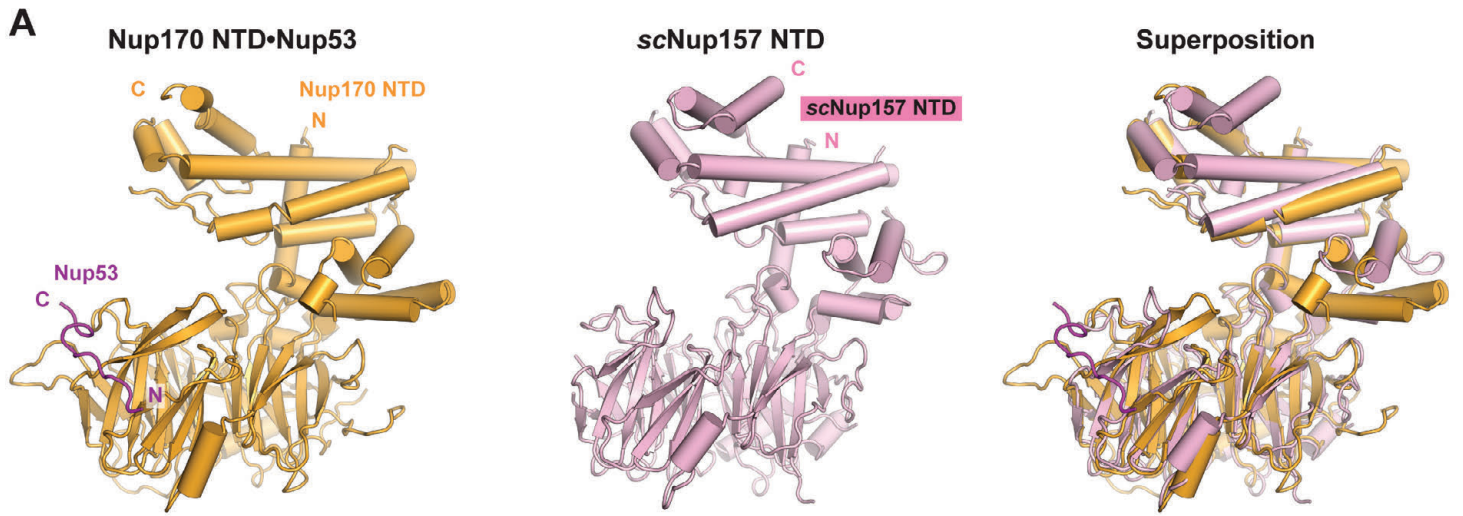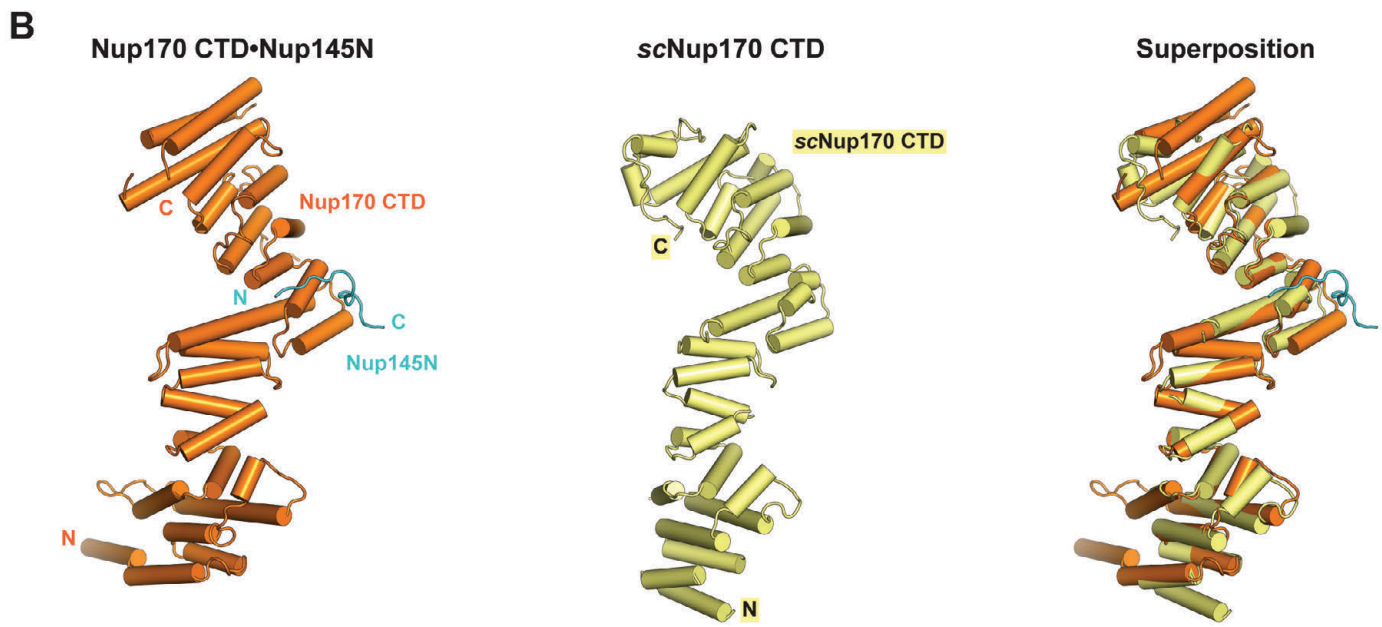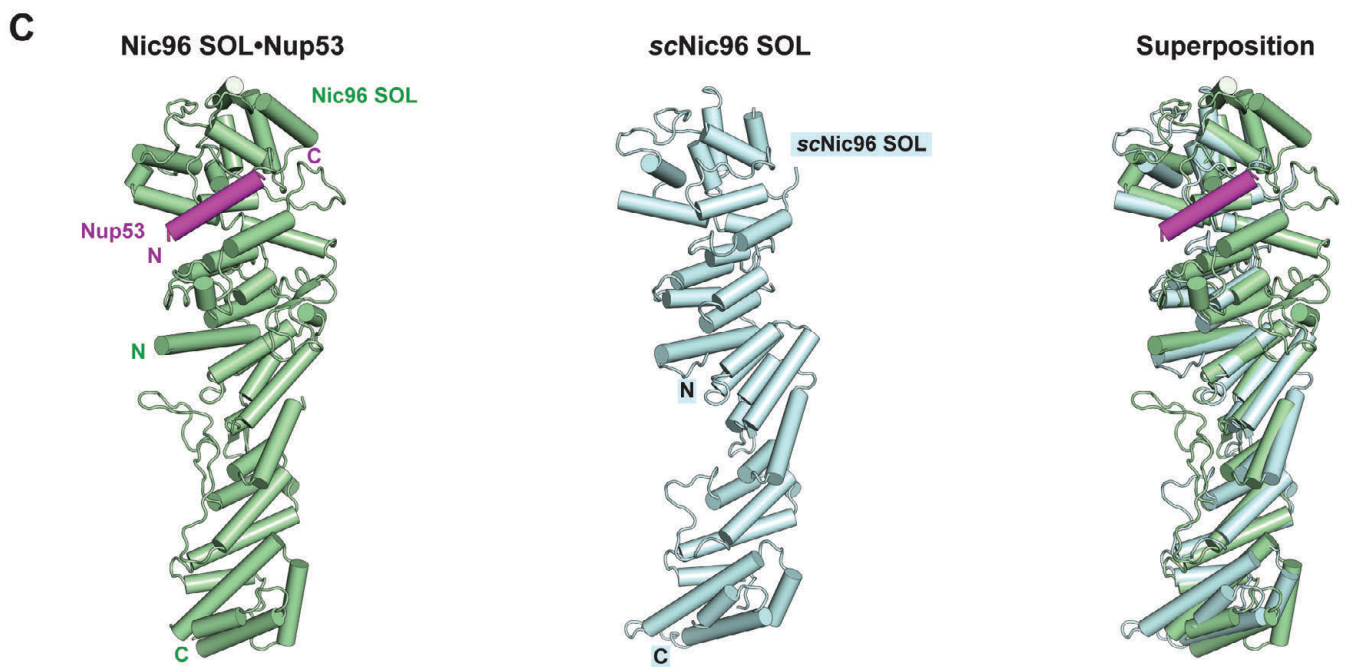

**Fig. S45.**

**Overall nucleoporin folds are evolutionarily conserved.** Structural comparison of *C. thermophilum* Nup170 and Nic96 complexes reported here and previously determined *apo S. cerevisiae* crystal structures, revealing extensive evolutionary conservation of the overall folds. **(A)** Nup170<sup>NTD</sup>•Nup53<sup>R3</sup> (left), scNup157<sup>NTD</sup> (PDB ID 4MHC; middle), and their superposition (right) are shown in cartoon representation (21). **(B)** Nup170<sup>CTD</sup>•Nup145N<sup>R3</sup> (left), scNup170<sup>CTD</sup> (PDB ID 3I5P; middle), and their superposition (right) are shown in cartoon representation (23). **(C)** Nic96<sup>SOL</sup>•Nup53<sup>R2</sup> (left), scNic96<sup>SOL</sup> (PDB ID 2RFO; middle), and their superposition (right) are shown in cartoon representation (24).

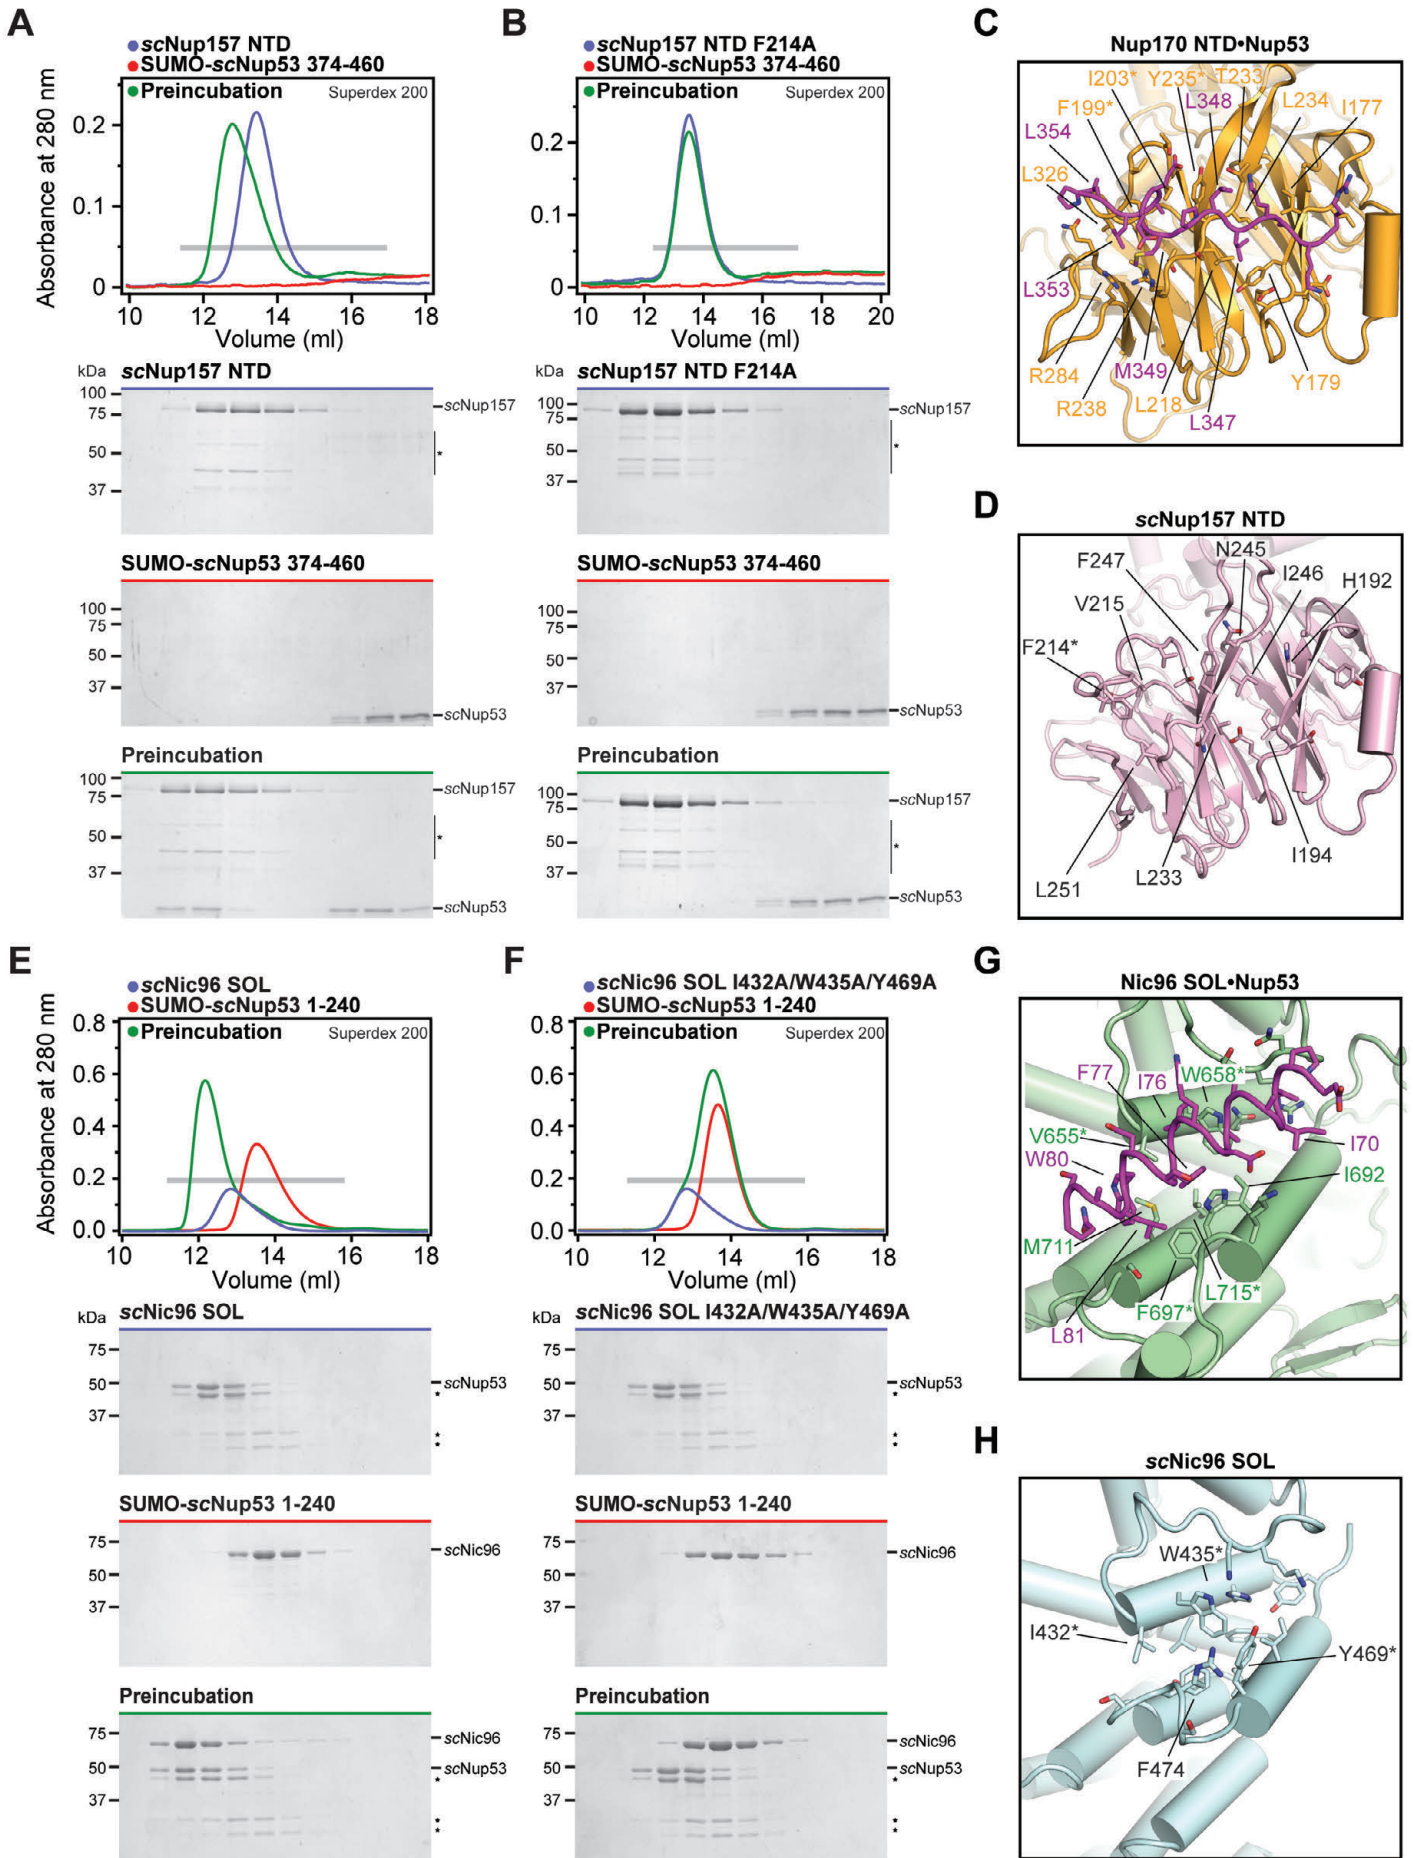

**Fig. S46.**

**Binding pockets on scNup157 and scNic96 for scNup53 are evolutionarily conserved.** (A, B) SEC interaction experiments were performed with constructs of *S. cerevisiae* Nup157<sup>NTD</sup> and Nup53 homologous to the crystallized Nup170<sup>NTD</sup>•Nup53<sup>R3</sup> complex and with a mutant Nup157<sup>NTD</sup> construct in which a conserved F214 residue in the Nup53 binding pocket was mutated to alanine. SEC profiles of nucleoporins are shown individually (blue and red) and after their preincubation (green). (C) A close-up view of the Nup170<sup>NTD</sup>•Nup53<sup>R3</sup> complex, same as Fig. 3C. (D) A close-up view of the corresponding surface of scNup157 (PDB ID 4MHC) reveals that the hydrophobic binding pocket for Nup53<sup>R3</sup> is intact (21). An asterisk highlights the scNup157<sup>NTD</sup> mutant that abolished the interaction with scNup53. (E, F) Interaction experiments were performed with fragments of *S. cerevisiae* Nic96<sup>SOL</sup> and Nup53 homologous to the crystallized Nic96<sup>SOL</sup>•Nup53<sup>R2</sup> complex and with mutant scNic96<sup>SOL</sup> in which conserved hydrophobic residues within the Nup53 binding pocket were mutated to alanine. SEC profiles of nucleoporins are shown individually (blue and red) and after their preincubation (green). (G) A close-up view of the Nic96<sup>SOL</sup>•Nup53<sup>R2</sup> complex, same as Fig. 4C. (H) A close-up view of the corresponding surface of scNic96<sup>SOL</sup> (PDB ID 2RFO) reveals that the hydrophobic groove that recognizes Nup53<sup>R2</sup> is intact (24). Asterisks highlight the scNic96<sup>SOL</sup> mutants that abolished the interaction with scNup53. All SEC profiles were obtained using a Superdex 200 10/300 GL column. Gray bars indicate fractions that were resolved on SDS-PAGE gels and visualized by Coomassie staining.

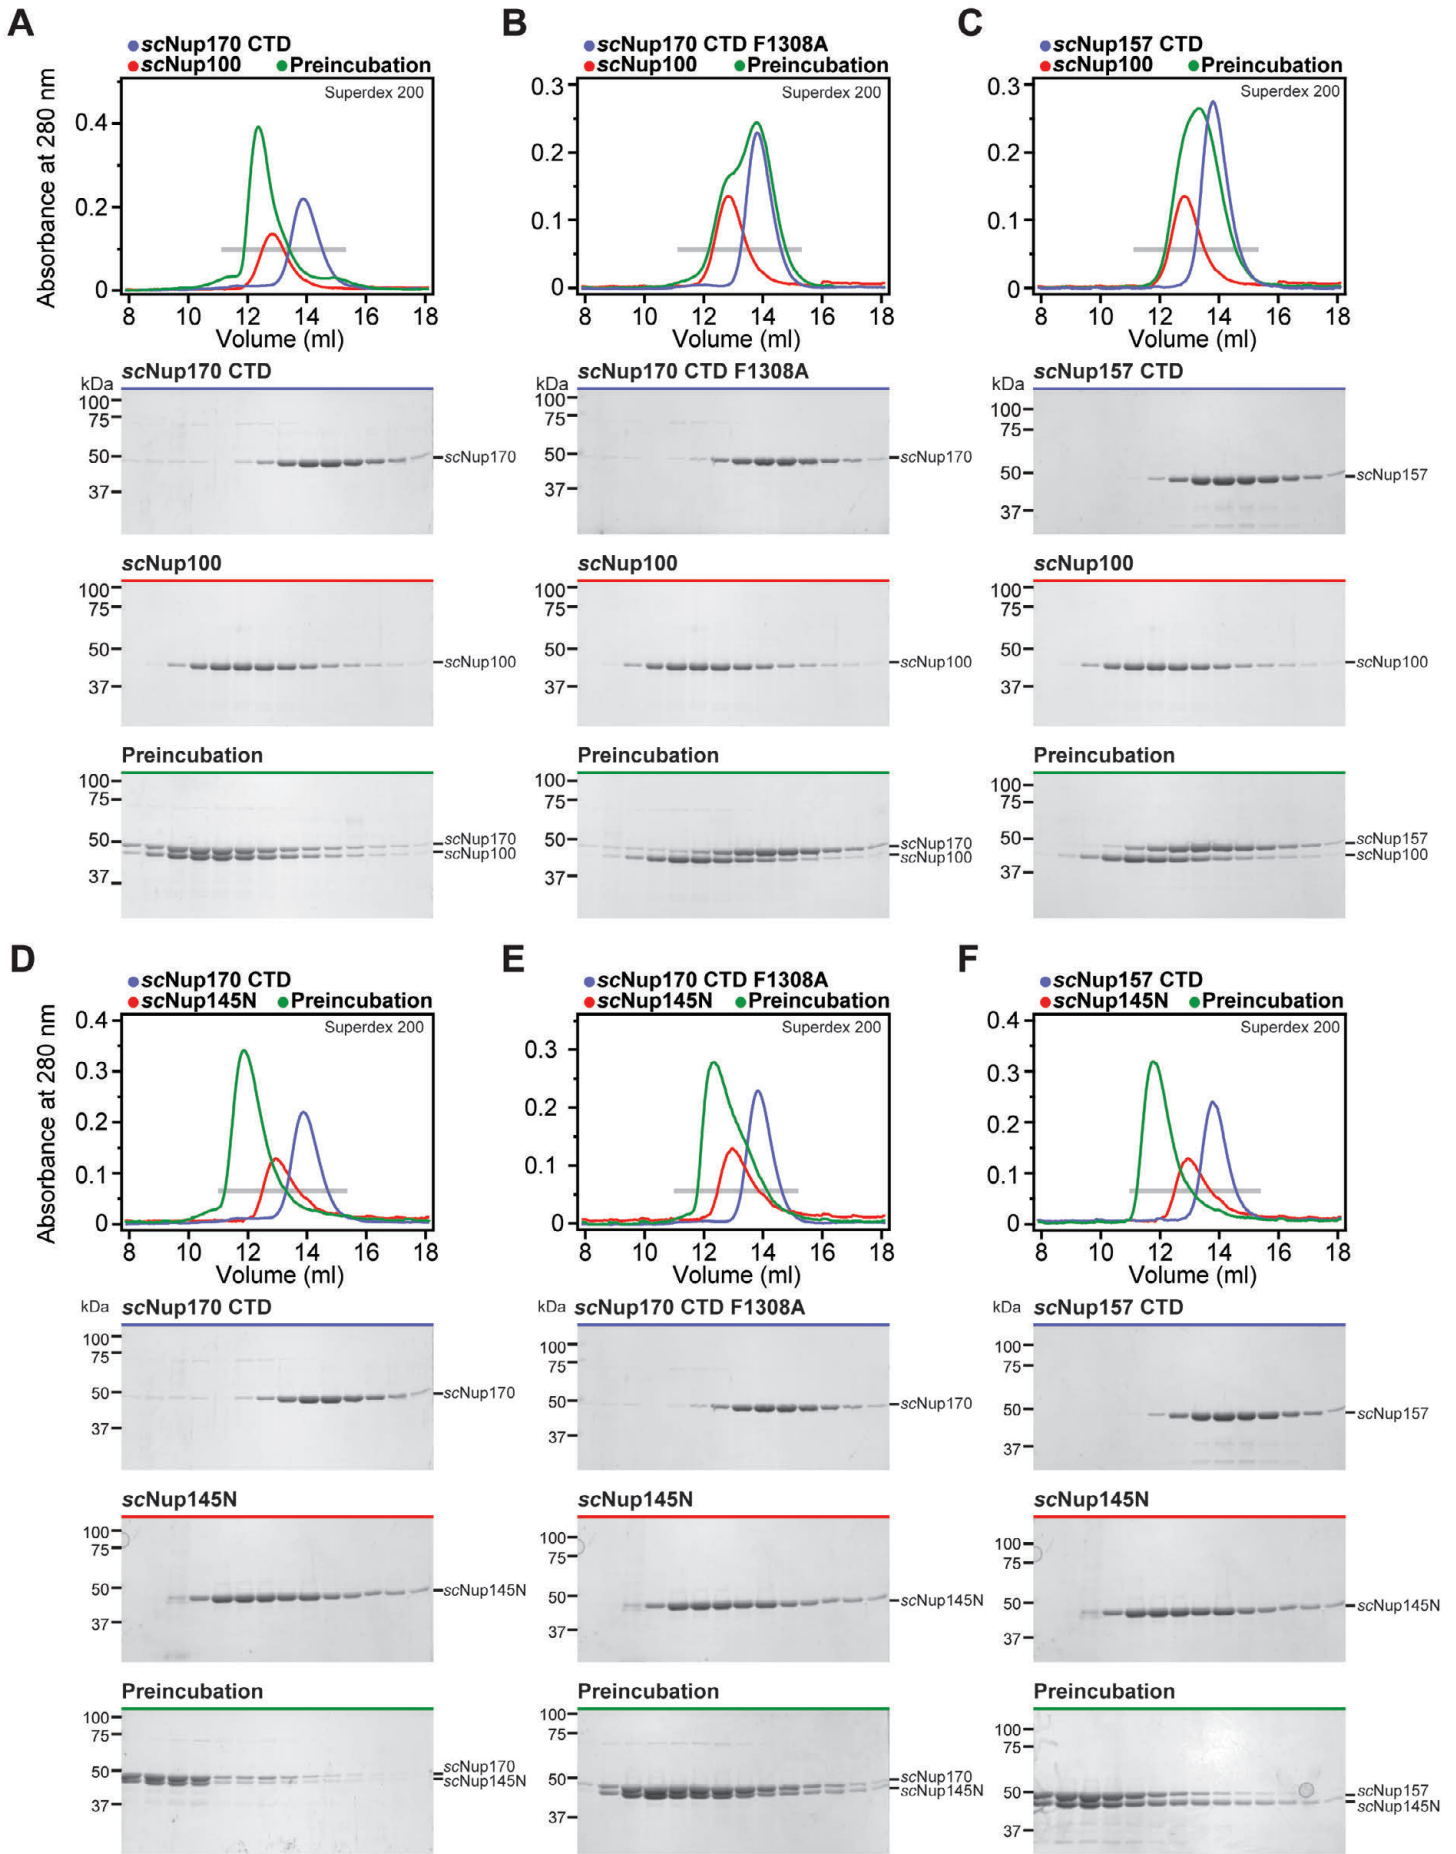

**Fig. S47.**

**Binding pockets on scNup157 and scNup170 for the Nup145N paralogs scNup100 and scNup145N are conserved.** (A-F) SEC profiles of nucleoporins or nucleoporin complexes are shown individually (blue and red) and after their preincubation (green). All SEC profiles were obtained using a Superdex 200 10/300 GL column. Gray bars indicate fractions that were resolved on SDS-PAGE gels and visualized by Coomassie staining.



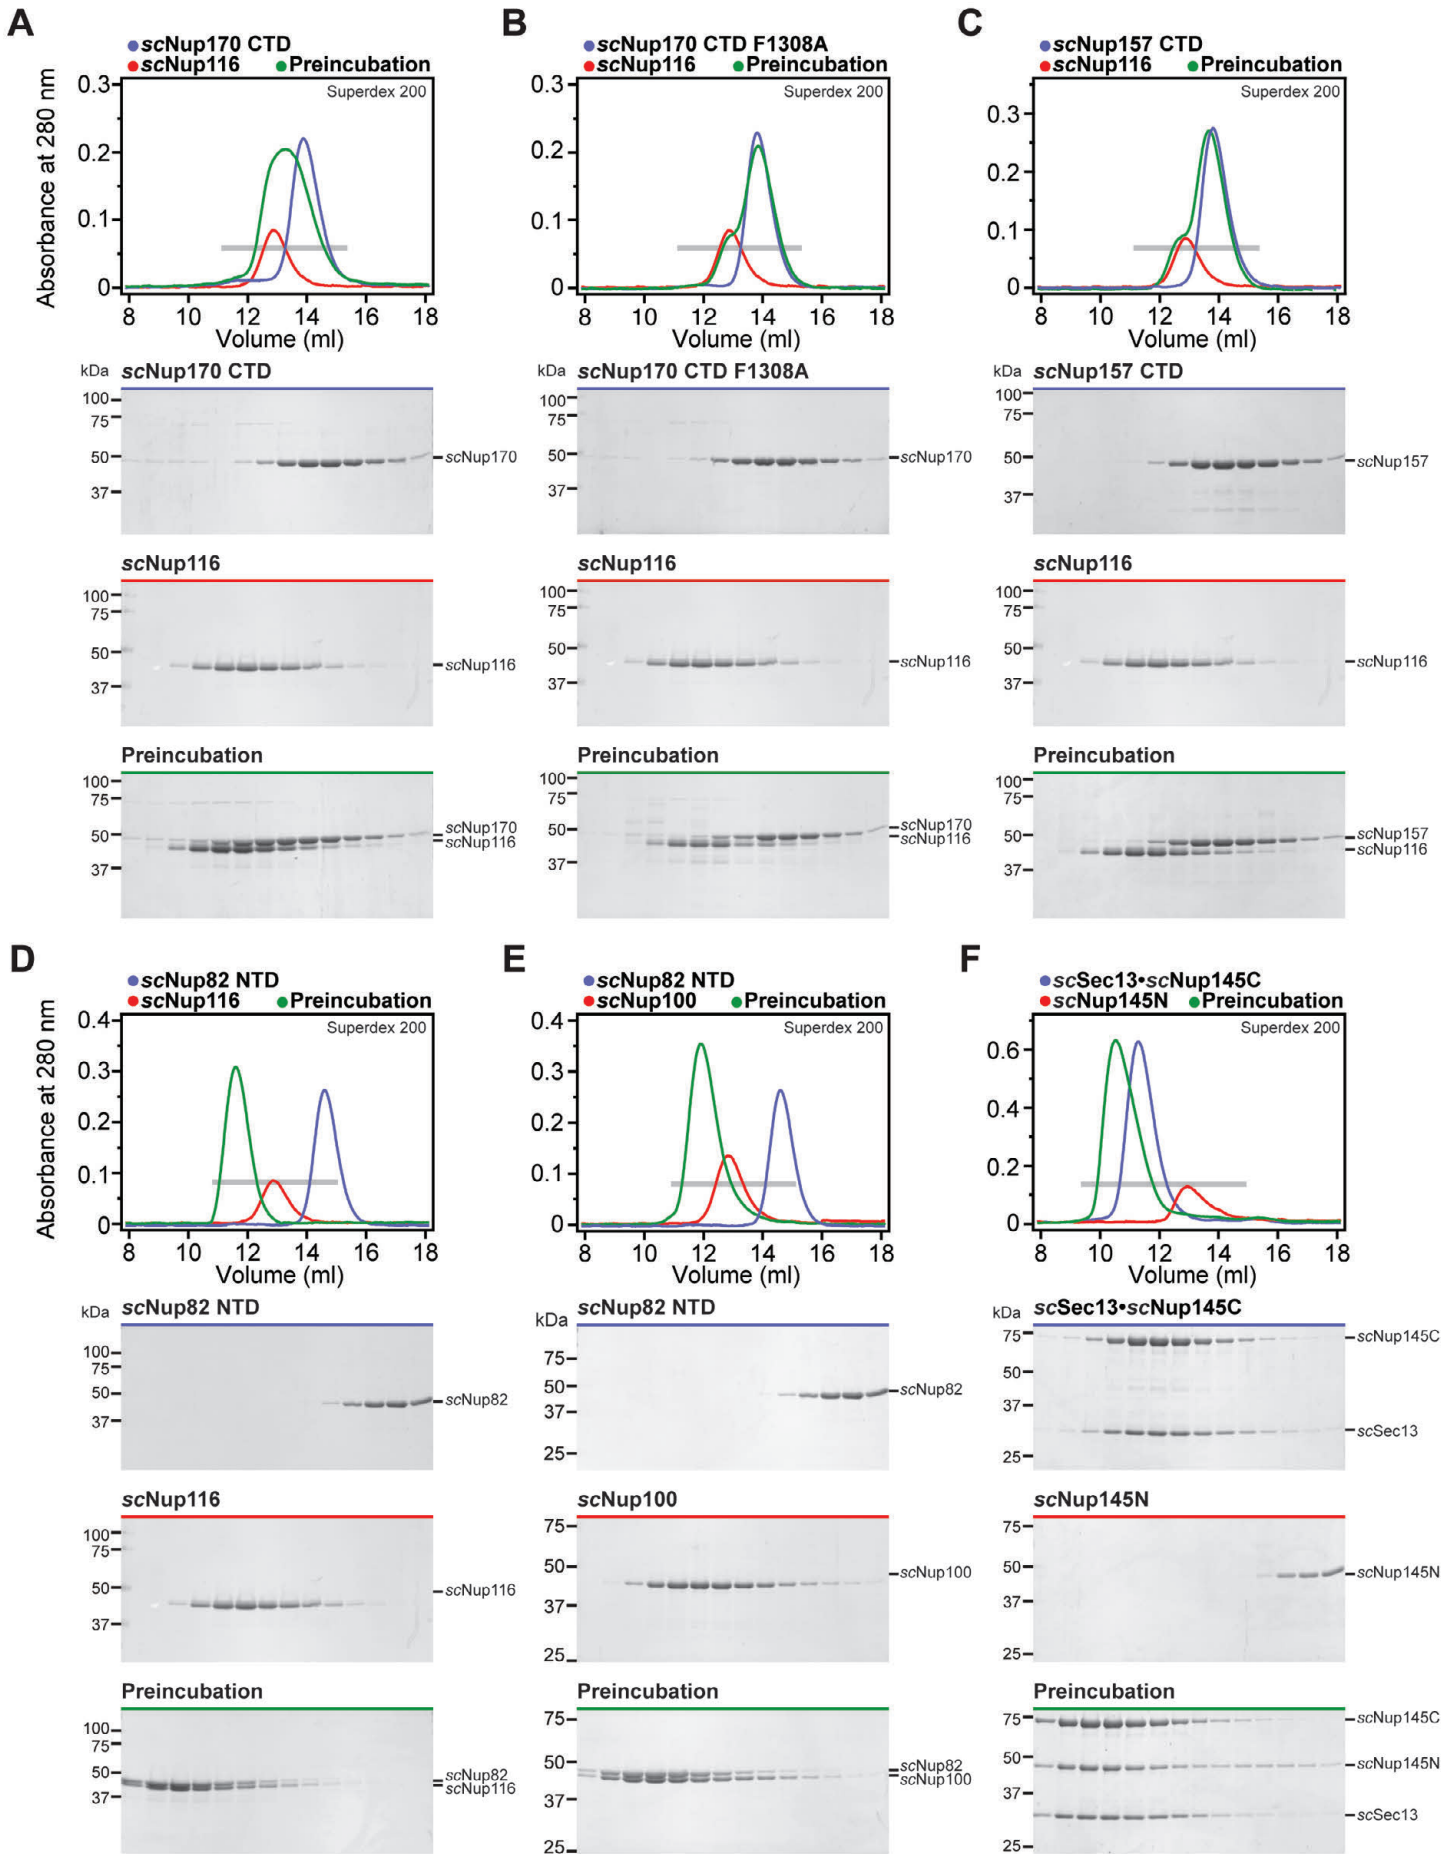

**Fig. S48.**

**Other Nup145N interactions are conserved in the three *S. cerevisiae* paralogs scNup100, scNup145N, and scNup116, but scNup116 only binds very weakly to scNup170<sup>CTD</sup> and scNup157<sup>CTD</sup>.** (A-F) SEC profiles of nucleoporins or nucleoporin complexes are shown individually (blue and red) and after their preincubation (green). All SEC profiles were obtained using a Superdex 200 10/300 GL column. Gray bars indicate fractions that were resolved on SDS-PAGE gels and visualized by Coomassie staining.

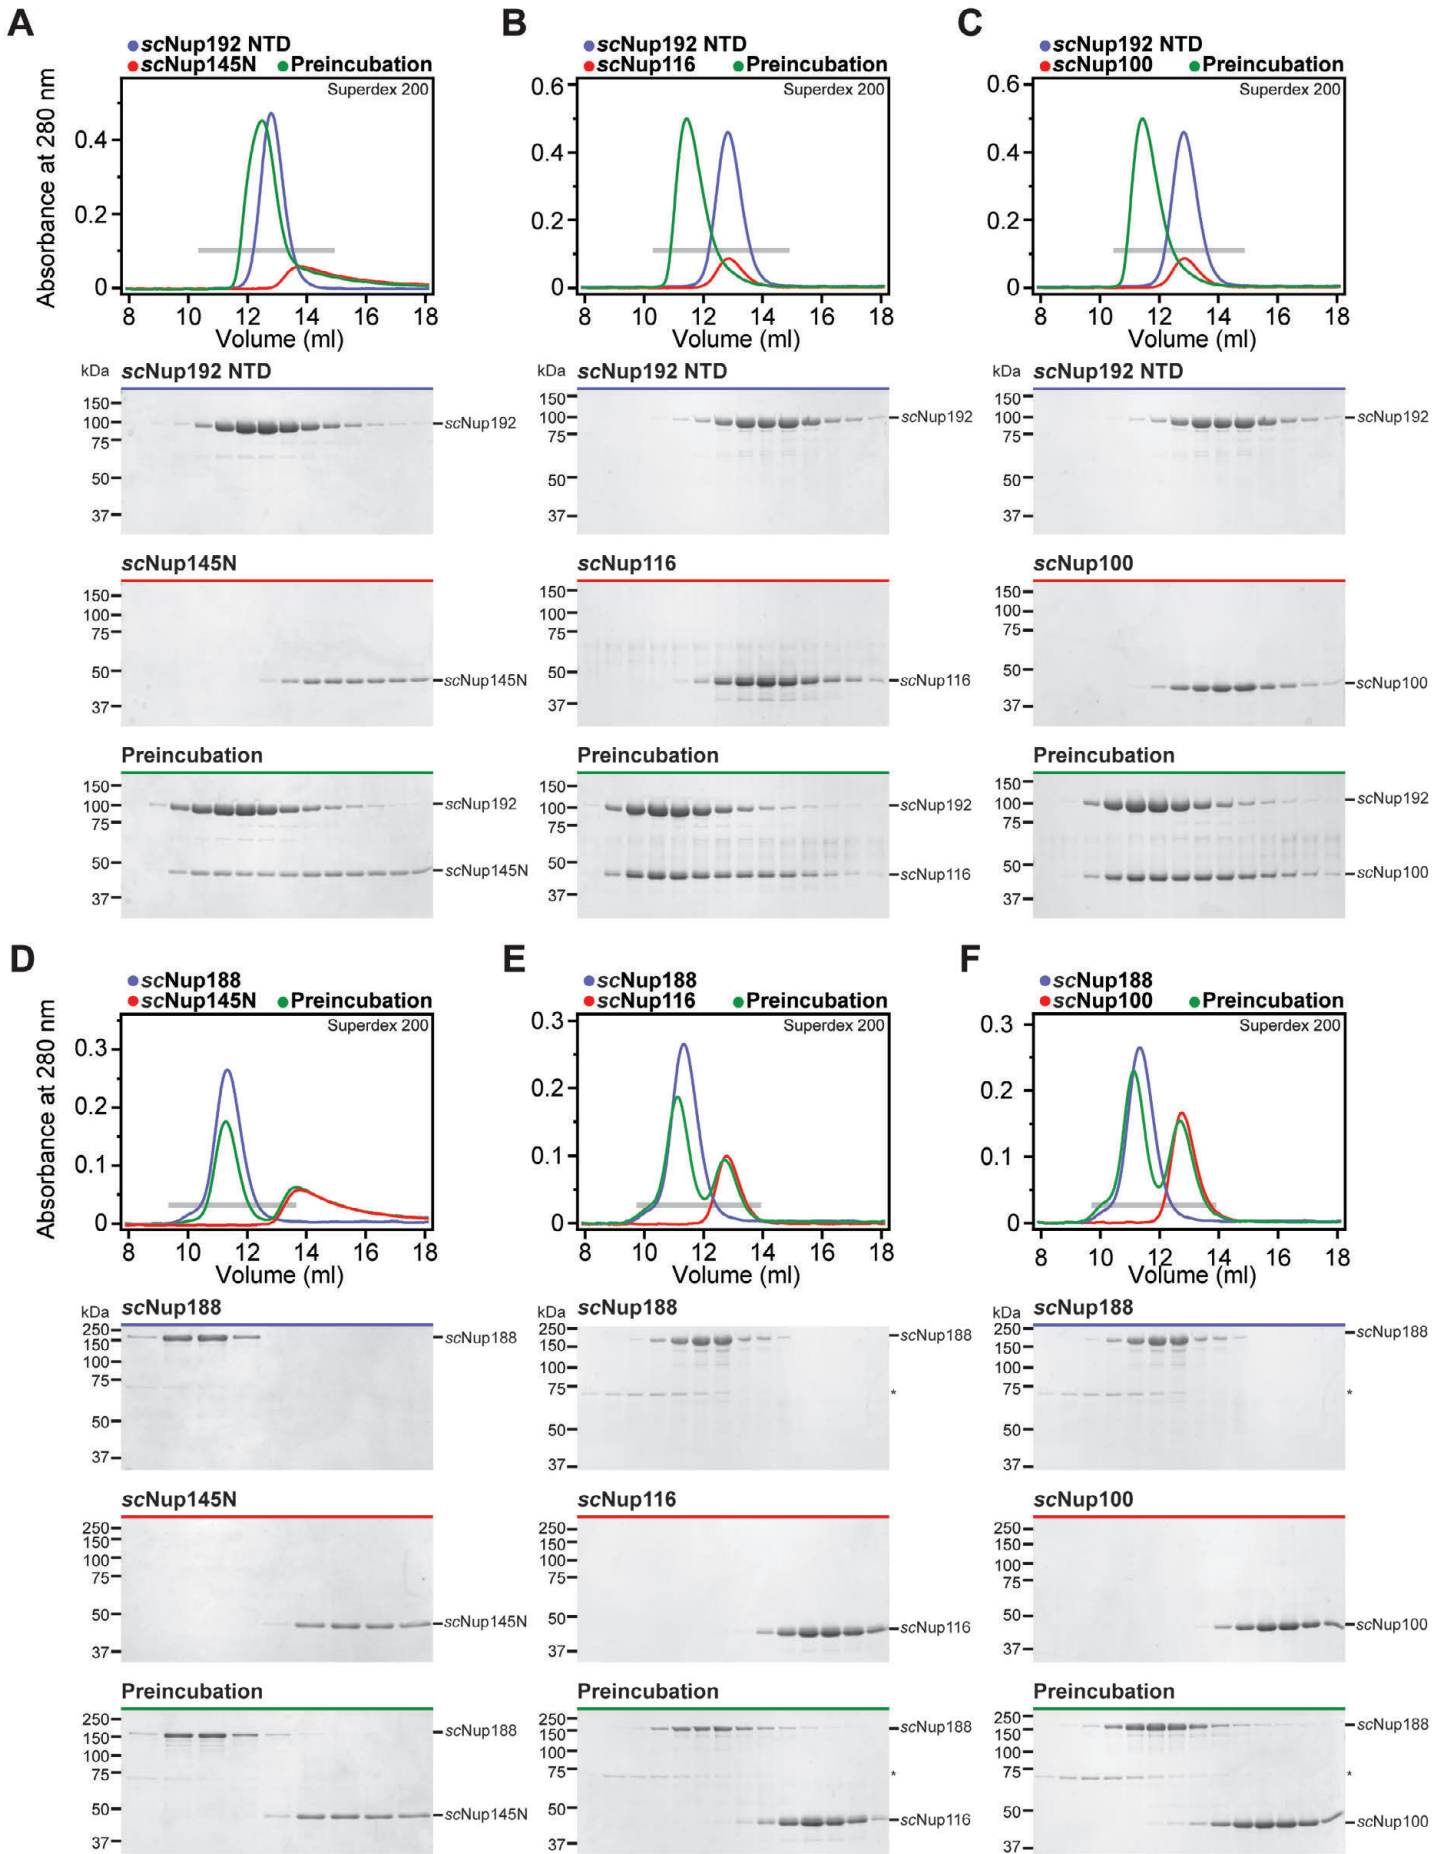

**Fig. S49.**

**All three *S. cerevisiae* Nup145N paralogs bind to scNup192<sup>NTD</sup>, but none bind to scNup188. (A-F)** SEC profiles of nucleoporins or nucleoporin complexes are shown individually (blue and red) and after their preincubation (green). All SEC profiles were obtained using a Superdex 200 10/300 GL column. Gray bars indicate fractions that were resolved on SDS-PAGE gels and visualized by Coomassie staining.

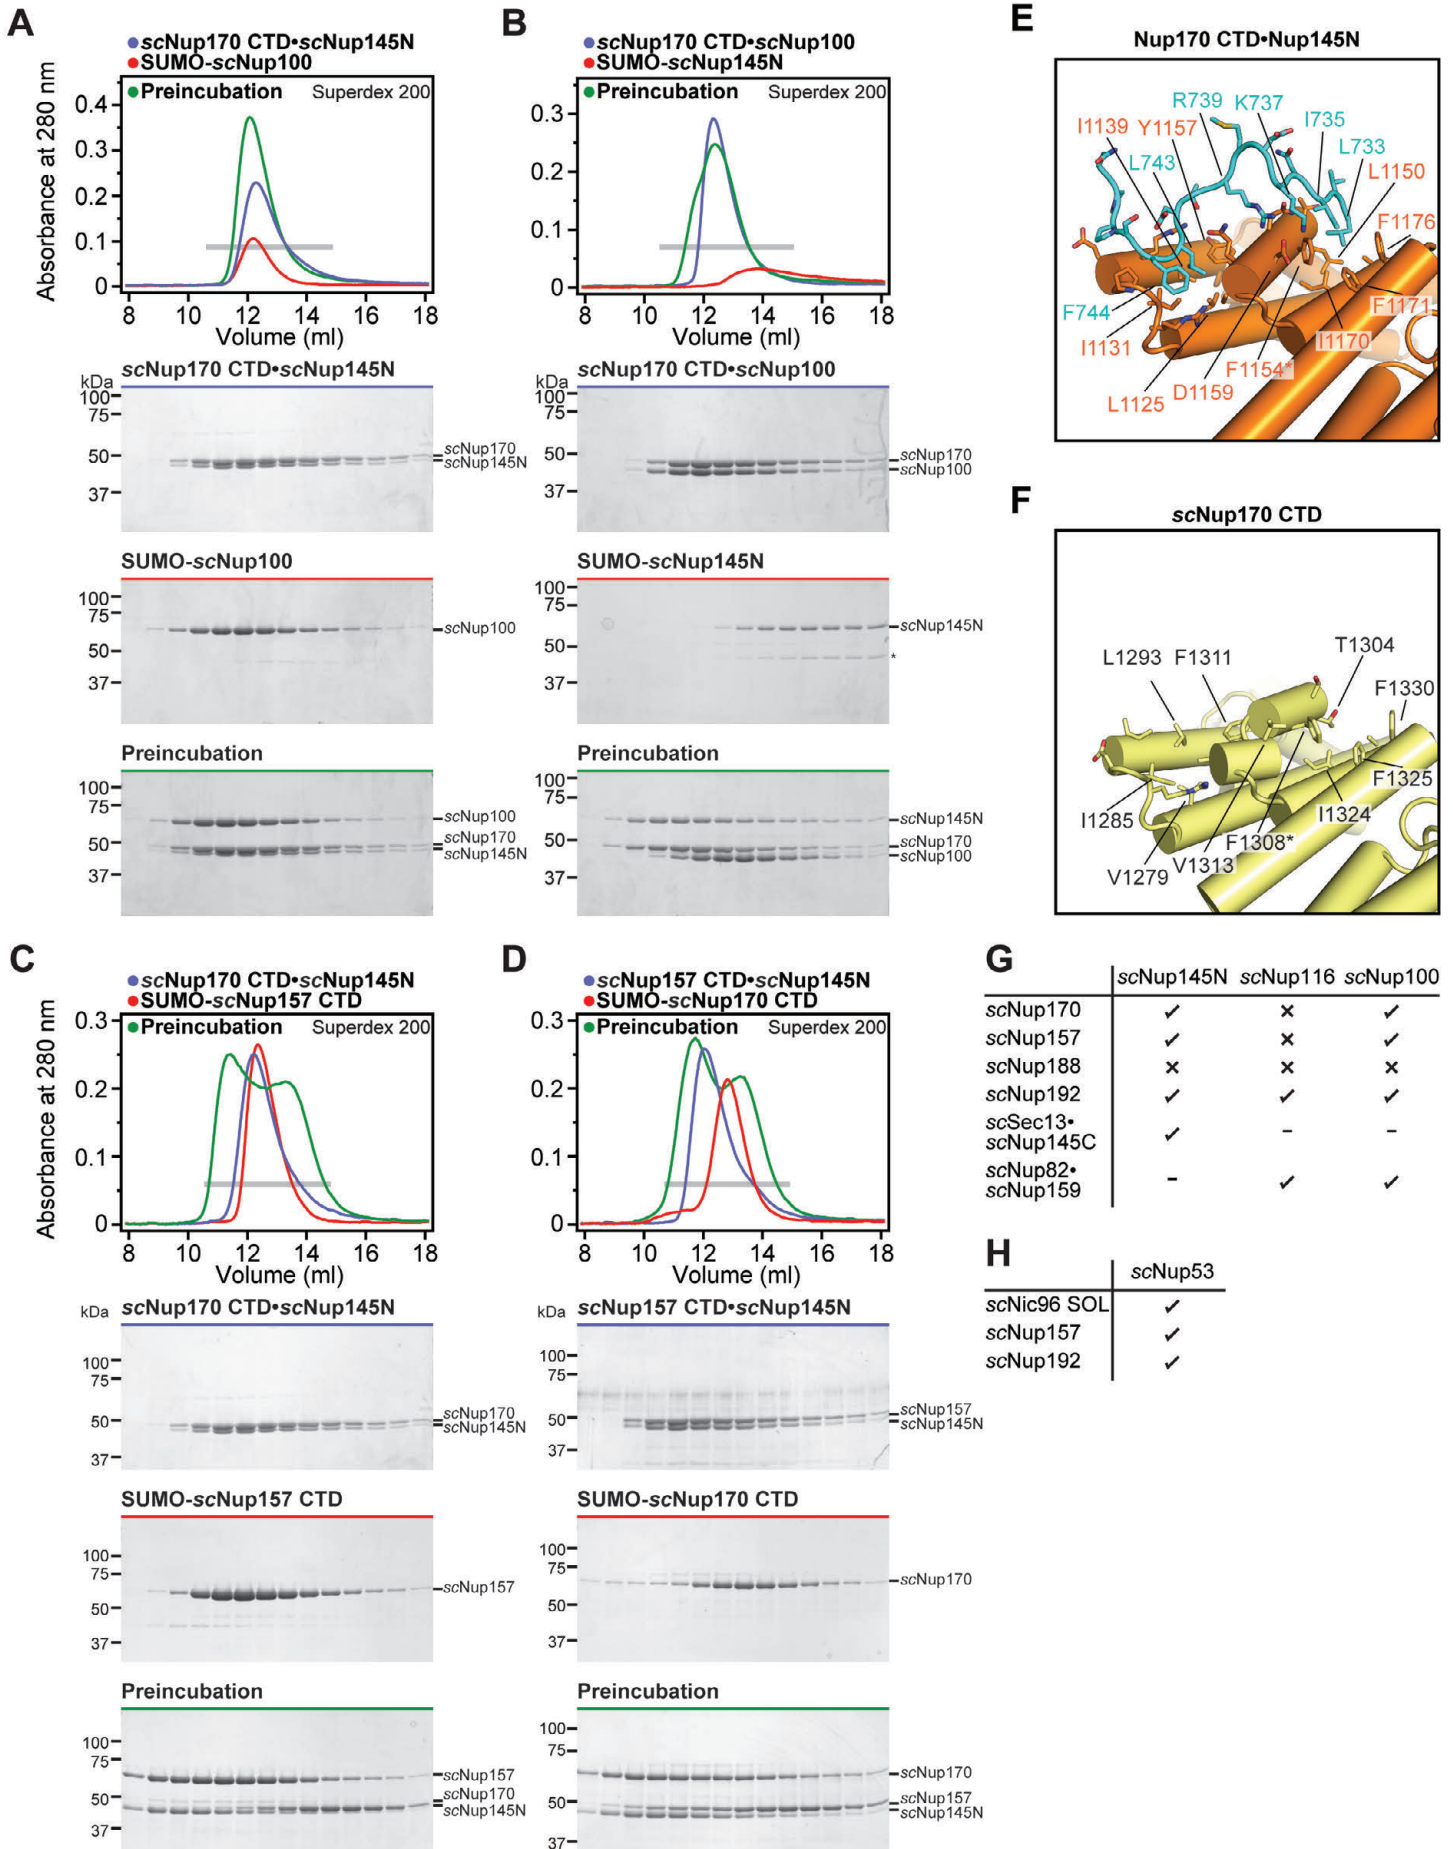

**Fig. S50.**

**scNup145N and scNup100 bind to scNup170<sup>CTD</sup> and scNup157<sup>CTD</sup> in a mutually exclusive fashion.** (A, B) scNup145N and scNup100 bind to scNup170<sup>CTD</sup> in a mutually exclusive fashion and scNup145N outcompetes scNup100. (C, D) scNup157<sup>CTD</sup> and scNup170<sup>CTD</sup> bind to scNup145N in a mutually exclusive fashion. SEC profiles of nucleoporins or nucleoporin complexes are shown individually (blue and red) and after their preincubation (green). All SEC profiles were obtained using a Superdex 200 10/300 GL column. Gray bars indicate fractions that were resolved on SDS-PAGE gels and visualized by Coomassie staining. (E) Close-up view of the Nup170<sup>CTD</sup>•Nup145N<sup>R3</sup> complex. (F) Close-up view of the corresponding surface in scNup170<sup>CTD</sup> (PDB ID 3I5P) revealed that both hydrophobic binding pockets for Nup145N<sup>R3</sup> are conserved (23). The conserved residue, F1308, which was mutated in the interaction experiments in [figs. S47 and S48](#) is indicated by an asterisk. (G) Summary of the results of interaction experiments performed with *S. cerevisiae* Nup145N homologs. Check marks indicate complexes that can form in SEC experiments, crosses indicate complexes that do not form, and dashes indicate complexes that were not tested. (H) Summary of the results of interaction experiments performed with *S. cerevisiae* Nup53. Check marks indicate complexes that can form in SEC experiments, crosses indicate complexes that do not form, and dashes indicate complexes that were not tested.

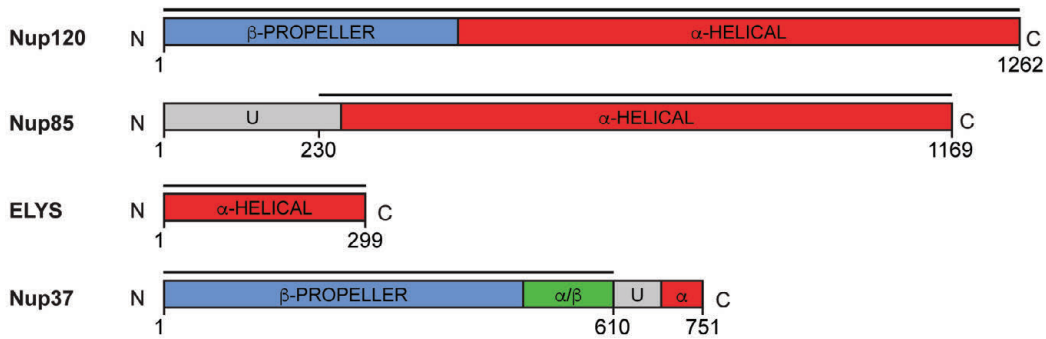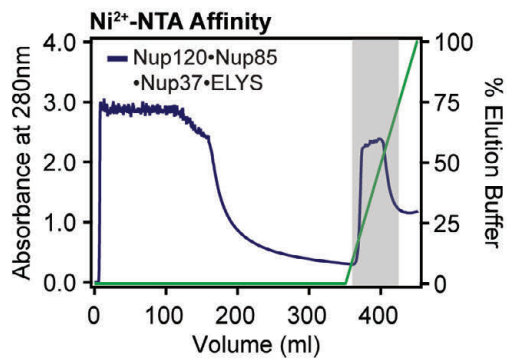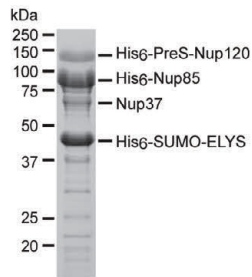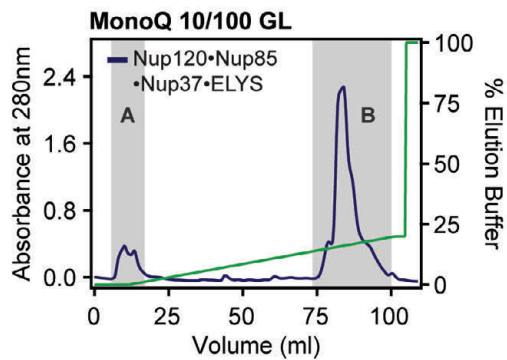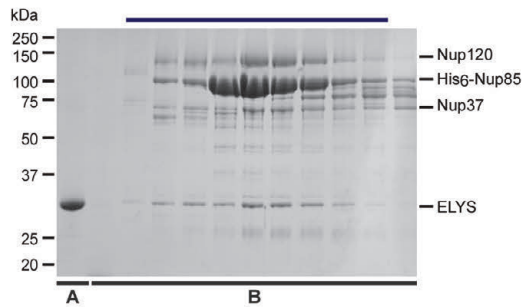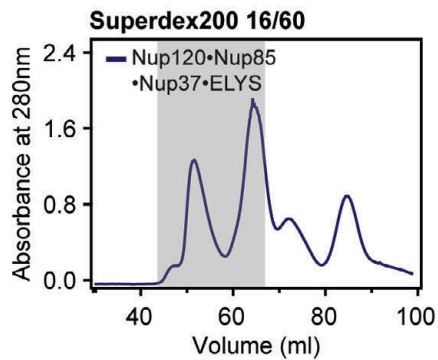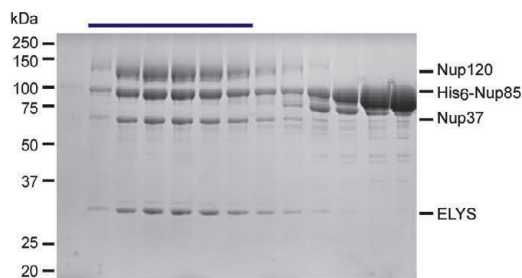

**Fig. S51.**

**Purification protocol for Nup120•Nup37•ELYS•Nup85 hetero-tetramer.** Domain boundaries of the purified nucleoporins are shown with black lines indicating the construct boundaries. Sequential chromatography purification steps are shown from top to bottom with the employed columns indicated. Gray bars indicate fractions that were resolved on SDS-PAGE gels and visualized by Coomassie staining. Pooled fractions are indicated with a black bar above the SDS-PAGE gels. For details of the buffer conditions see [Table S2](#).



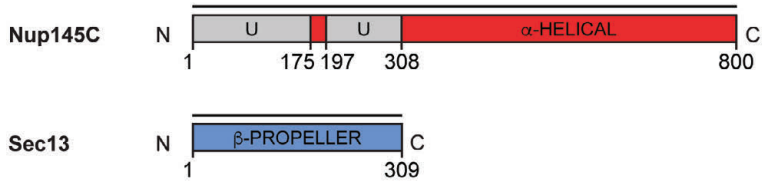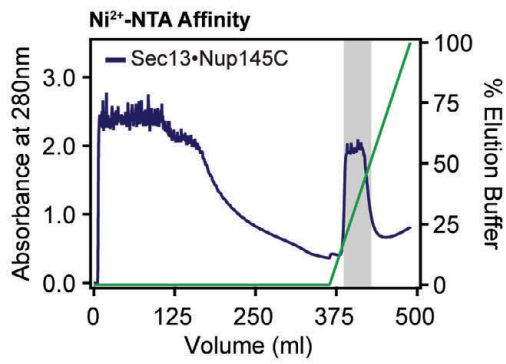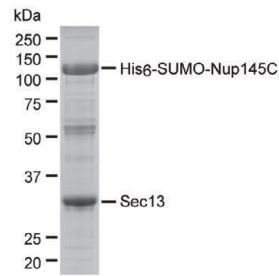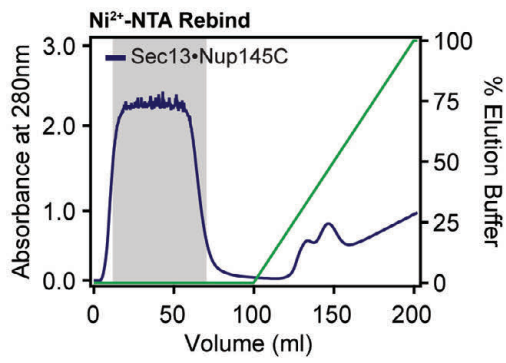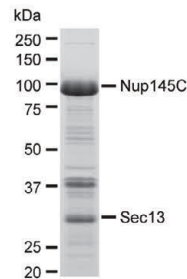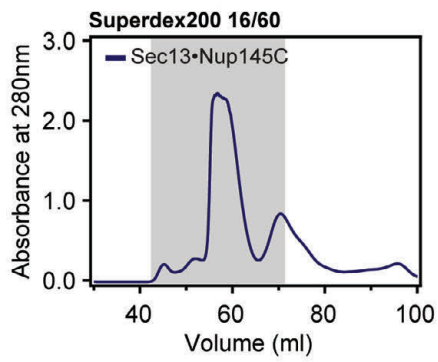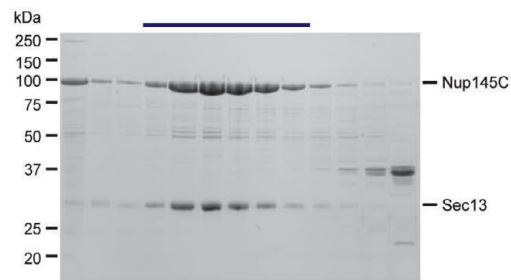

**Fig. S52.**

**Purification protocol for the Sec13•Nup145C hetero-dimer.** Domain boundaries of the purified nucleoporins are shown with black lines indicating the construct boundaries. Sequential chromatography purification steps are shown from top to bottom with the employed columns indicated. Gray bars indicate fractions that were resolved on SDS-PAGE gels and visualized by Coomassie staining. Pooled fractions are indicated with a black bar above the SDS-PAGE gels. For details of the buffer conditions see [Table S2](#).

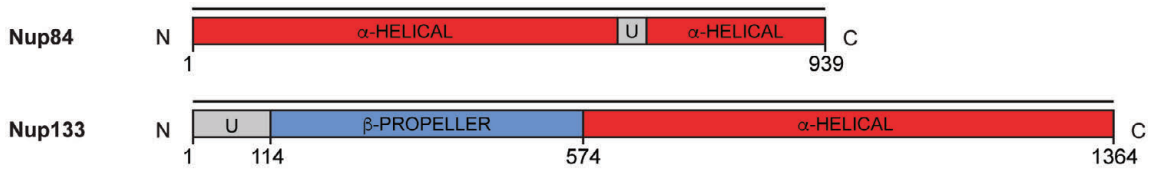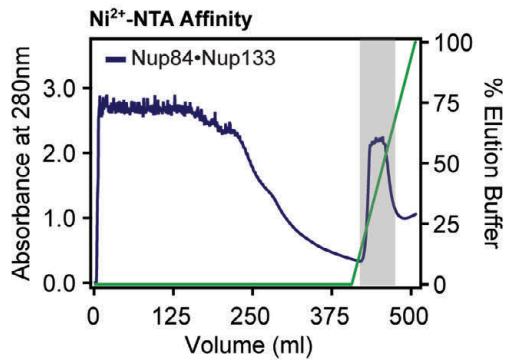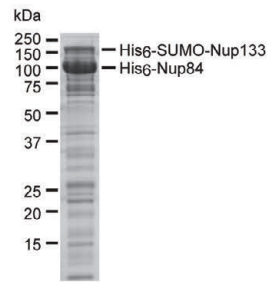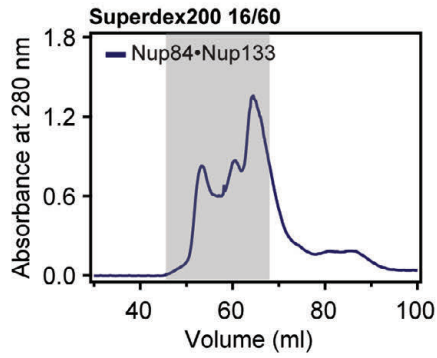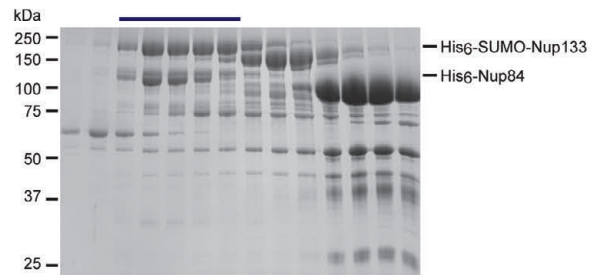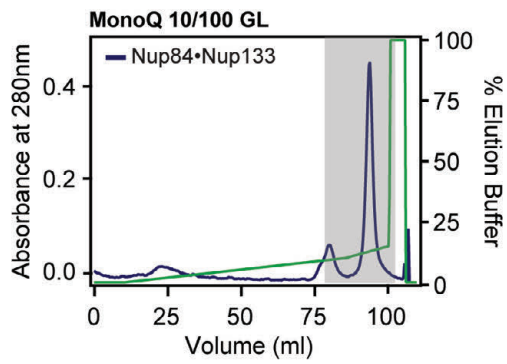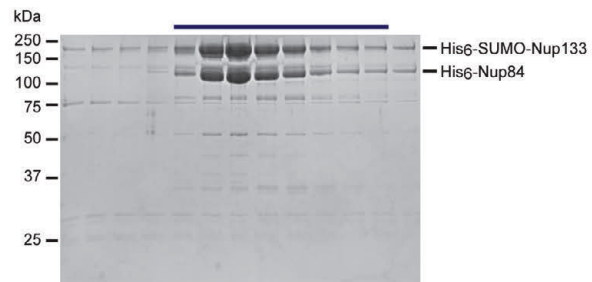

**Fig. S53.**

**Purification protocol for the Nup84•Nup133 hetero-dimer.** Domain boundaries for the purified proteins are shown above with black lines indicating the construct boundaries. Sequential steps of purification via chromatography are shown from top to bottom, with the fractions pooled for the subsequent step highlighted in grey. SDS-PAGE gels for each step of the purification are shown next to each chromatogram. Buffer conditions can be found in [Table S2](#).

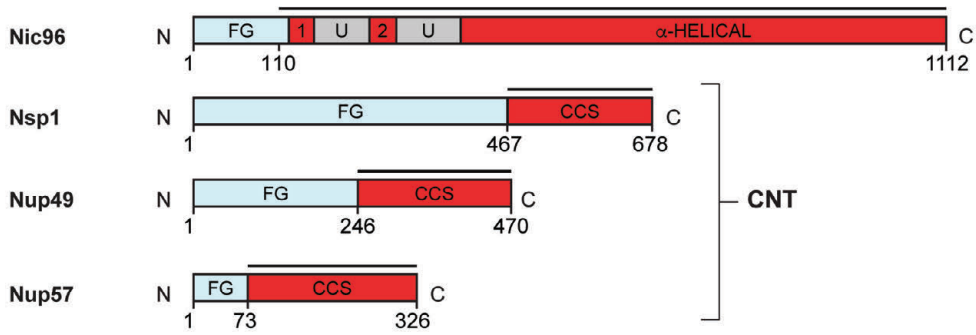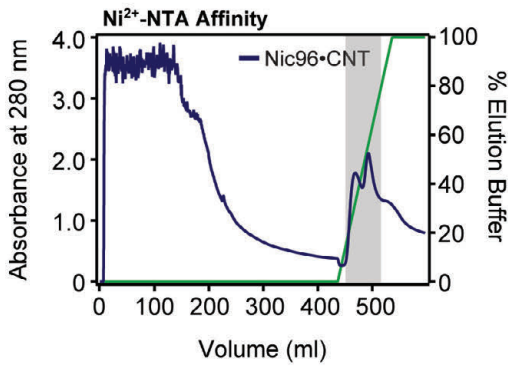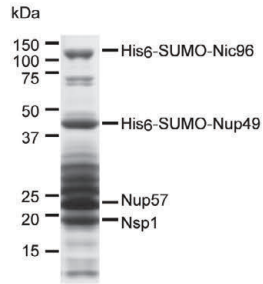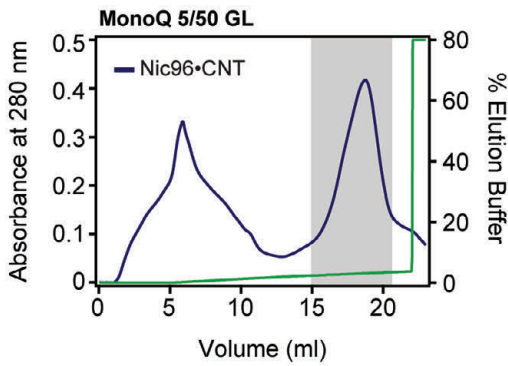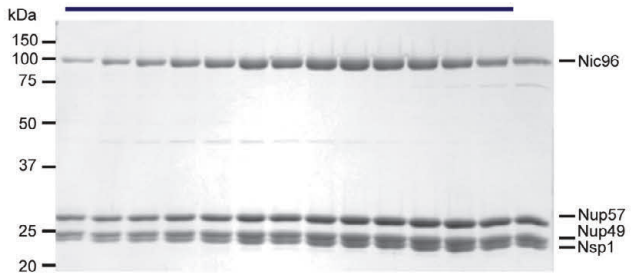

**Fig. S54.**

**Purification protocol for the CNT•Nic96 hetero-tetramer.** Domain boundaries of the purified nucleoporins are shown with black lines indicating the construct boundaries. Sequential chromatography purification steps are shown from top to bottom with the employed columns indicated. Gray bars indicate fractions that were resolved on SDS-PAGE gels and visualized by Coomassie staining. Pooled fractions are indicated with a black bar above the SDS-PAGE gels. For details of the buffer conditions see [Table S2](#).

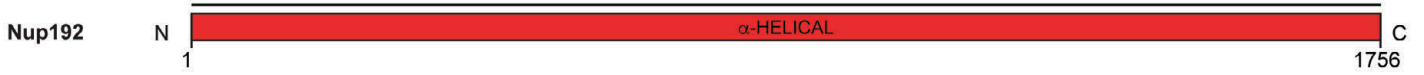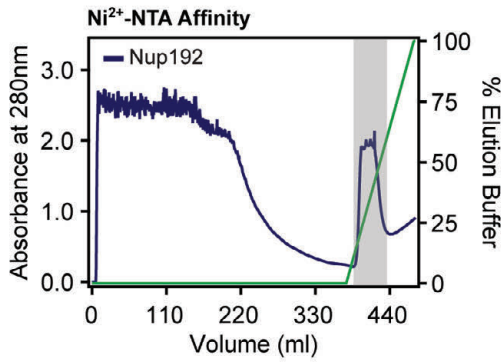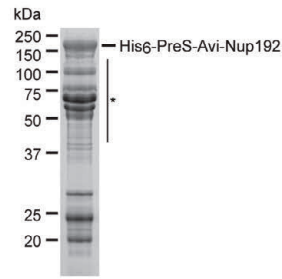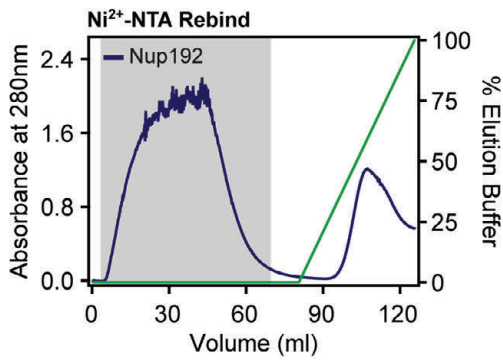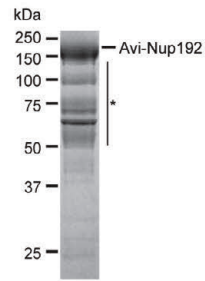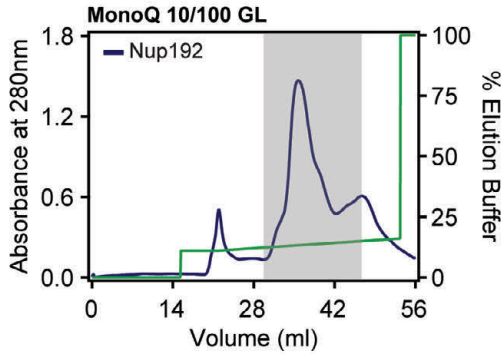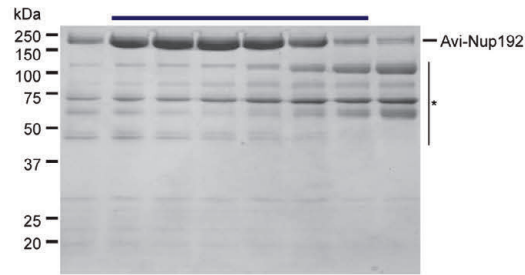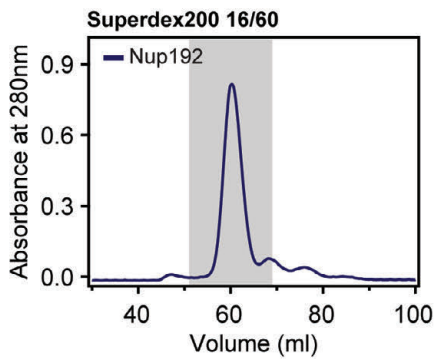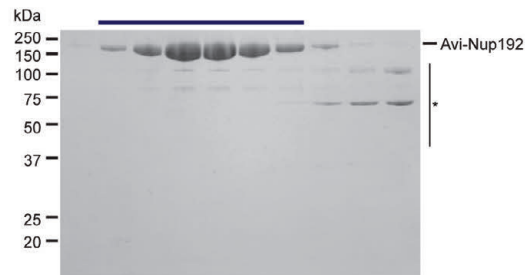

**Fig. S55.**

**Purification protocol for Nup192.** Domain boundaries of the purified nucleoporins are shown with black lines indicating the construct boundaries. Sequential chromatography purification steps are shown from top to bottom with the employed columns indicated. Gray bars indicate fractions that were resolved on SDS-PAGE gels and visualized by Coomassie staining. Pooled fractions are indicated with a black bar above the SDS-PAGE gels. For details of the buffer conditions see [Table S2](#).



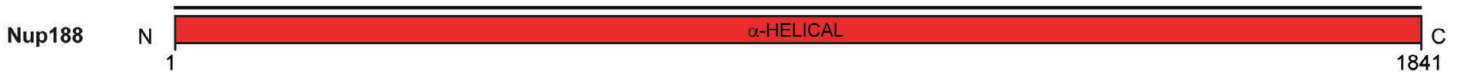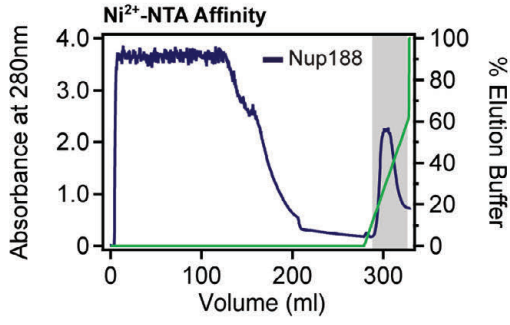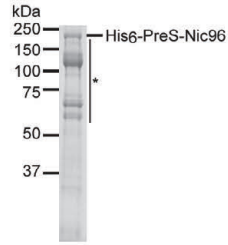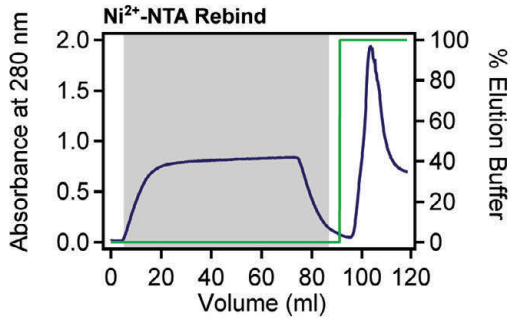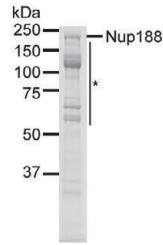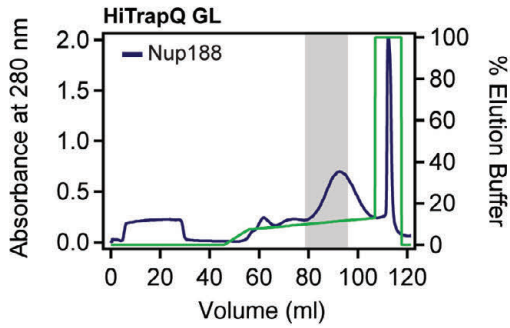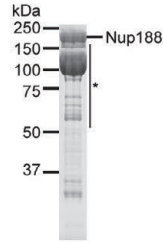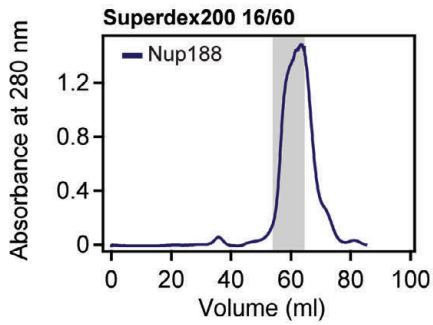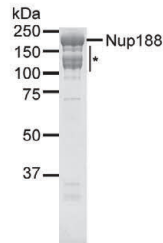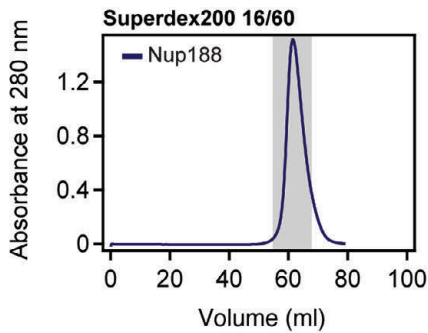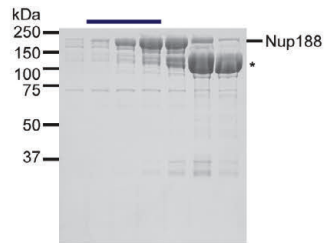

**Fig. S56.**

**Purification protocol for Nup188.** Domain boundaries of the purified nucleoporins are shown with black lines indicating the construct boundaries. Sequential chromatography purification steps are shown from top to bottom with the employed columns indicated. Gray bars indicate fractions that were resolved on SDS-PAGE gels and visualized by Coomassie staining. Pooled fractions are indicated with a black bar above the SDS-PAGE gels. For details of the buffer conditions see [Table S2](#).

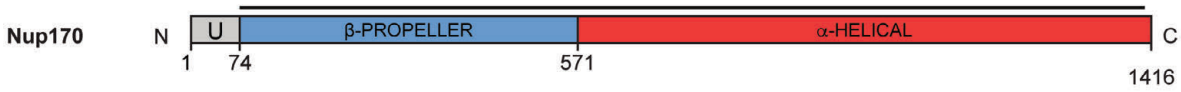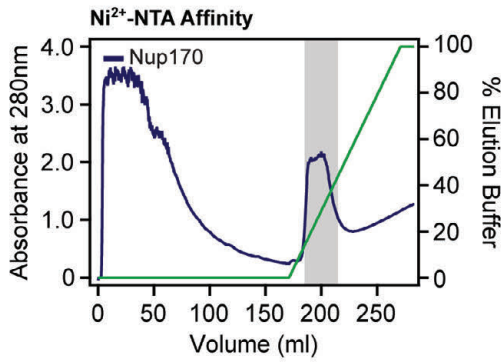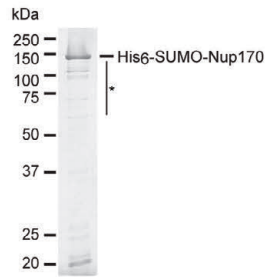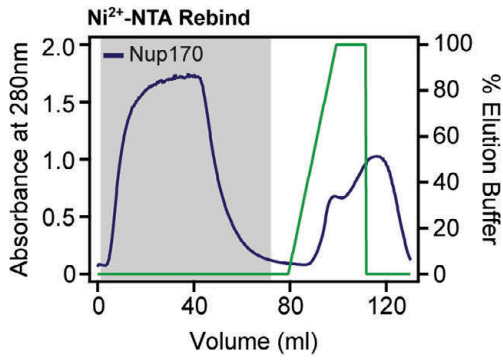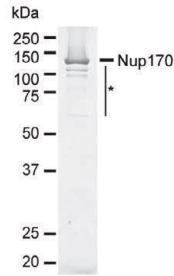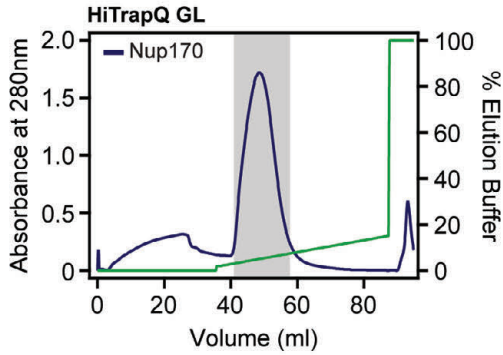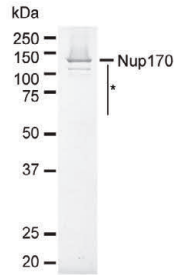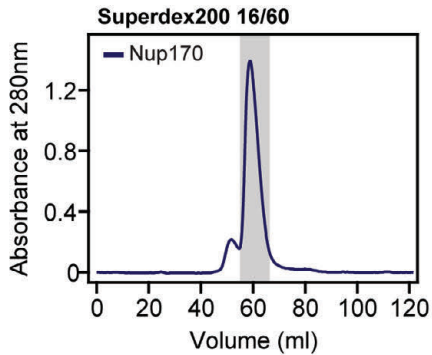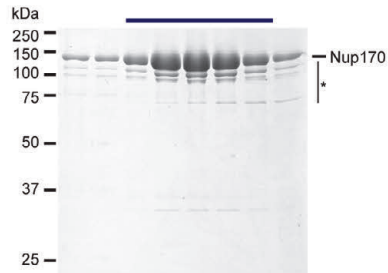

**Fig. S57.**

**Purification protocol for Nup170.** Domain boundaries of the purified nucleoporins are shown with black lines indicating the construct boundaries. Sequential chromatography purification steps are shown from top to bottom with the employed columns indicated. Gray bars indicate fractions that were resolved on SDS-PAGE gels and visualized by Coomassie staining. Pooled fractions are indicated with a black bar above the SDS-PAGE gels. For details of the buffer conditions see [Table S2](#).

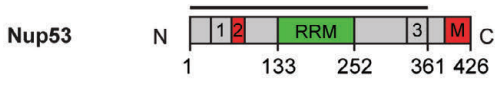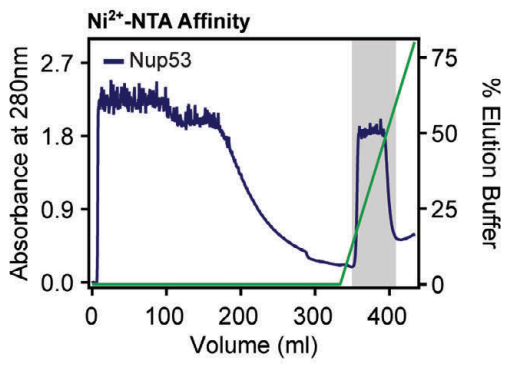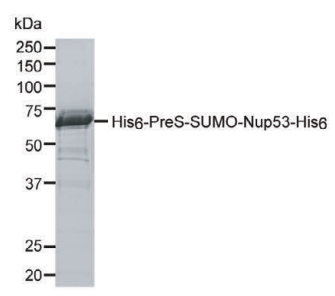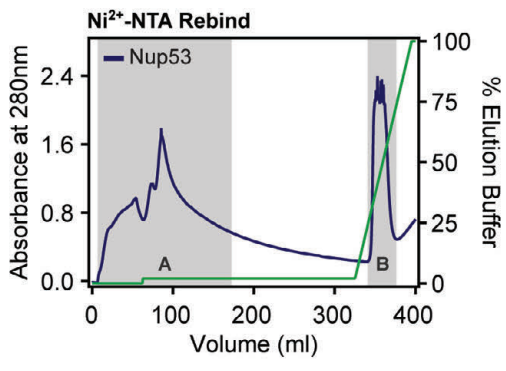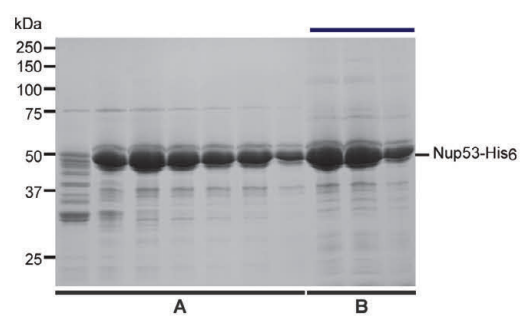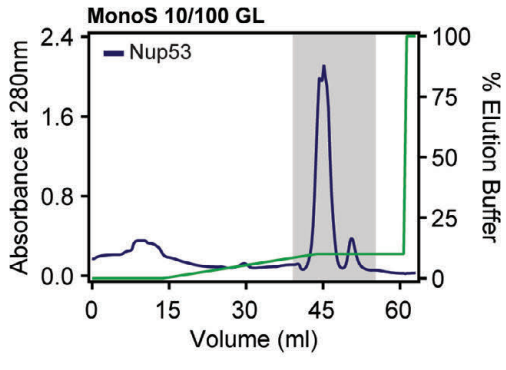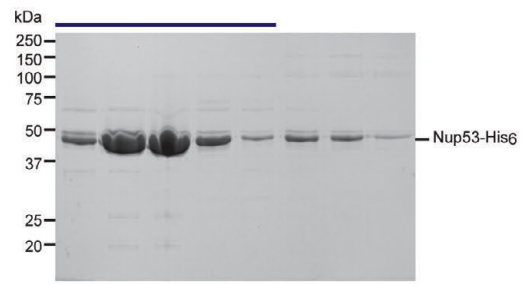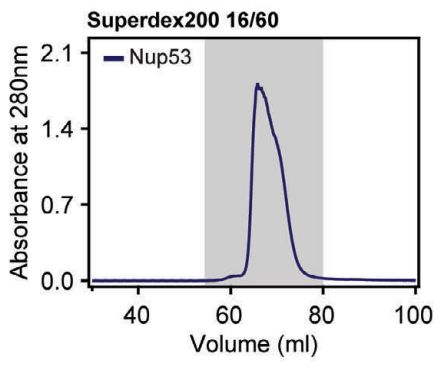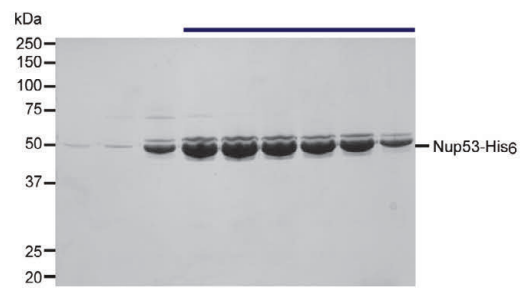

**Fig. S58.**

**Purification protocol for Nup53.** Domain boundaries of the purified nucleoporins are shown with black lines indicating the construct boundaries. Sequential chromatography purification steps are shown from top to bottom with the employed columns indicated. Gray bars indicate fractions that were resolved on SDS-PAGE gels and visualized by Coomassie staining. Pooled fractions are indicated with a black bar above the SDS-PAGE gels. For details of the buffer conditions see [Table S2](#).

Nup145N

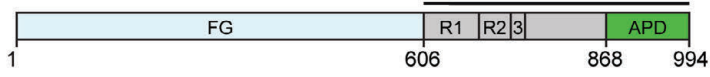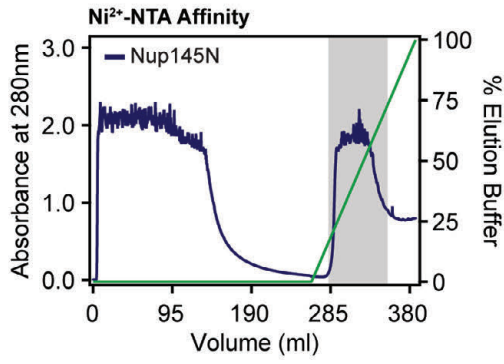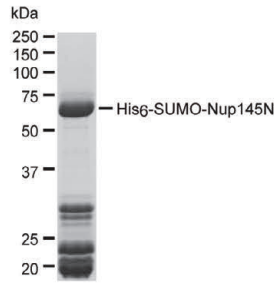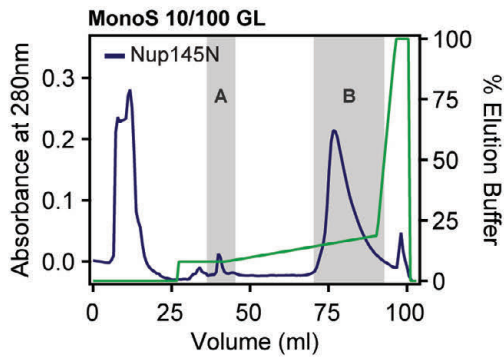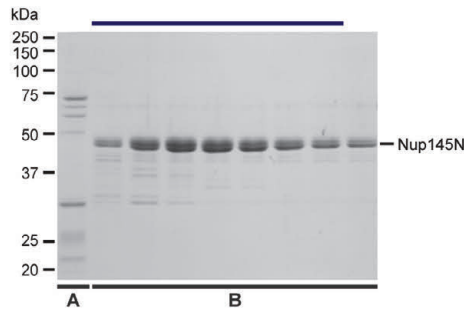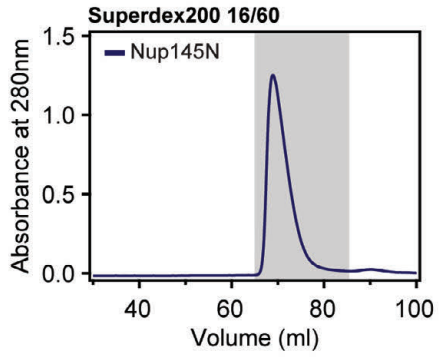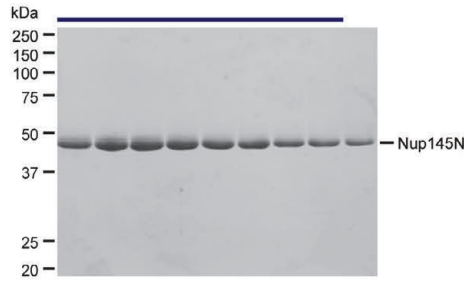

**Fig. S59.**

**Purification protocol for Nup145N.** Domain boundaries of the purified nucleoporins are shown with black lines indicating the construct boundaries. Sequential chromatography purification steps are shown from top to bottom with the employed columns indicated. Gray bars indicate fractions that were resolved on SDS-PAGE gels and visualized by Coomassie staining. Pooled fractions are indicated with a black bar above the SDS-PAGE gels. For details of the buffer conditions see [Table S2](#).



**Table S1.****Bacterial expression constructs and expression conditions**

| #   | Protein                                     | Residues                 | Expression vector | Restriction sites 5', 3'                  | N-terminal overhang  | C-terminal overhang  | Expression conditions                            |
|-----|---------------------------------------------|--------------------------|-------------------|-------------------------------------------|----------------------|----------------------|--------------------------------------------------|
| 1   | Nup82 NTD                                   | 1-595                    | pET28a-PreS       | NdeI, NotI                                | GPH                  | none                 | 18 °C / 18 hours                                 |
| 2   | Nup159 T                                    | 1440-1481                | pET28a-SUMO       | BamHI, NotI                               | S                    | none                 | 18 °C / 18 hours                                 |
| 3   | Nup120<br>Nup37<br>ELYS                     | 1-1262<br>1-610<br>1-299 | pET-MCN-SUMO      | NdeI, BamHI<br>NdeI, BamHI<br>BamHI, NotI | GPHMHSHHHH<br>Q<br>S | none<br>none<br>none | 37 °C / 2 hours                                  |
| 4   | Nup85                                       | 230-1169                 | pET24a            | NdeI, BamHI                               | MGHSHHHH             | none                 | 37 °C / 2 hours                                  |
| 5   | Sec13                                       | 1-309                    | pETMCN            | NdeI, BamHI                               | Q                    | none                 | 23 °C / 18 hours;<br>coexpressed with<br>Nup145C |
| 6   | Nup145C                                     | 1-800                    | pET-MCN-SUMO      | NcoI, NotI                                | S                    | none                 | 23 °C / 18 hours;<br>coexpressed with<br>Sec13   |
| 7   | Nup84                                       | 1-939                    | pET24a            | NdeI, BamHI                               | MGHSHHHH             | none                 | 23 °C / 18 hours;<br>coexpressed with<br>Nup133  |
| 8   | Nup133                                      | 1-1364                   | pET-MCN-SUMO      | EcoRI, HindIII                            | SEF                  | none                 | 23 °C / 18 hours;<br>coexpressed with<br>Nup84   |
| 9   | Nup133 ΔNTE                                 | 105-1364                 | pET-MCN-SUMO      | EcoRI, HindIII                            | SEF                  | none                 | 23 °C / 18 hours;<br>coexpressed with<br>Nup84   |
| 10  | Nup53                                       | 1-361                    | pET28a-SUMO       | BamHI, XhoI                               | S                    | LEHSHHHH             | 23 °C / 18 hours                                 |
| 11* | Nup53 RRM                                   | 133-253                  | pET28a-PreS       | NdeI, XhoI                                | GPHM                 | none                 | 23 °C / 18 hours                                 |
| 12  | Nup53 R2                                    | 69-90                    | pET28a-SUMO       | BamHI, NotI                               | S                    | none                 | 37 °C / 2 hours                                  |
| 13* | Nup53                                       | 31-84                    | pET28a-SUMO       | BamHI, NotI                               | S                    | none                 | 37 °C / 2 hours                                  |
| 14  | Nup53 R1                                    | 31-67                    | pET28a-SUMO       | BamHI, NotI                               | S                    | none                 | 37 °C / 2 hours                                  |
| 15  | Nup53                                       | 1-90                     | pET28a-SUMO       | BamHI, NotI                               | S                    | none                 | 37 °C / 2 hours                                  |
| 16  | Nup53 R3                                    | 329-361                  | pGEX-6P-1         | BamHI, NotI                               | not cleaved          | none                 | 37 °C / 2 hours                                  |
| 17  | Nup53 R3 (F334A)                            | 329-361                  | pGEX-6P-1         | BamHI, NotI                               | not cleaved          | none                 | 37 °C / 2 hours                                  |
| 18  | Nup53 R3 (I338A)                            | 329-361                  | pGEX-6P-1         | BamHI, NotI                               | not cleaved          | none                 | 37 °C / 2 hours                                  |
| 19  | Nup53 R3 (R342A)                            | 329-361                  | pGEX-6P-1         | BamHI, NotI                               | not cleaved          | none                 | 37 °C / 2 hours                                  |
| 20  | Nup53 R3 (K343A)                            | 329-361                  | pGEX-6P-1         | BamHI, NotI                               | not cleaved          | none                 | 37 °C / 2 hours                                  |
| 21  | Nup53 R3 (L346A)                            | 329-361                  | pGEX-6P-1         | BamHI, NotI                               | not cleaved          | none                 | 37 °C / 2 hours                                  |
| 22  | Nup53 R3 (L347A)                            | 329-361                  | pGEX-6P-1         | BamHI, NotI                               | not cleaved          | none                 | 37 °C / 2 hours                                  |
| 23  | Nup53 R3 (E350A)                            | 329-361                  | pGEX-6P-1         | BamHI, NotI                               | not cleaved          | none                 | 37 °C / 2 hours                                  |
| 24  | Nup53 R3 (E351A)                            | 329-361                  | pGEX-6P-1         | BamHI, NotI                               | not cleaved          | none                 | 37 °C / 2 hours                                  |
| 25  | Nup53 R3 (L353A)                            | 329-361                  | pGEX-6P-1         | BamHI, NotI                               | not cleaved          | none                 | 37 °C / 2 hours                                  |
| 26  | Nup53 R3 (L354A)                            | 329-361                  | pGEX-6P-1         | BamHI, NotI                               | not cleaved          | none                 | 37 °C / 2 hours                                  |
| 27  | Nup170                                      | 74-1402                  | pET28a-SUMO       | BamHI, NotI                               | S                    | none                 | 37 °C / 2 hours                                  |
| 28  | Nup170 ΔC                                   | 74-1037                  | pET28a-SUMO       | BamHI, NotI                               | S                    | none                 | 37 °C / 2 hours                                  |
| 29* | Nup170 SOL                                  | 575-1402                 | pET28a-SUMO       | BamHI, NotI                               | S                    | none                 | 37 °C / 2 hours                                  |
| 30  | Nup170 CTD                                  | 851-1402                 | pET28a-SUMO       | BamHI, NotI                               | S                    | none                 | 37 °C / 2 hours                                  |
| 31* | Nup170 CTD (ΔTLR)                           | 851-1402 (Δ1375-1377)    | pET28a-SUMO       | BamHI, NotI                               | S                    | none                 | 37 °C / 2 hours                                  |
| 32* | Nup170 NTD                                  | 74-827 (Δ293-305)        | pET28a-SUMO       | BamHI, NotI                               | S                    | none                 | 37 °C / 2 hours                                  |
| 33* | Nup170 NTD                                  | 74-843 (Δ293-305)        | pET28a-SUMO       | BamHI, NotI                               | S                    | none                 | 37 °C / 2 hours                                  |
| 34  | Nup170 NTD (F199A)                          | 74-843                   | pET28a-SUMO       | BamHI, NotI                               | S                    | none                 | 37 °C / 2 hours                                  |
| 35  | Nup170 NTD (Y235A)                          | 74-843                   | pET28a-SUMO       | BamHI, NotI                               | S                    | none                 | 37 °C / 2 hours                                  |
| 36  | Nup170 NTD (V241A)                          | 74-843                   | pET28a-SUMO       | BamHI, NotI                               | S                    | none                 | 37 °C / 2 hours                                  |
| 37  | Nup170 NTD (W280A)                          | 74-843                   | pET28a-SUMO       | BamHI, NotI                               | S                    | none                 | 37 °C / 2 hours                                  |
| 38* | Nup170 CTD                                  | 851-1416                 | pET28a-SUMO       | BamHI, NotI                               | S                    | none                 | 37 °C / 2 hours                                  |
| 39  | Nup170 NTD (F281A)                          | 74-843                   | pET28a-SUMO       | BamHI, NotI                               | S                    | none                 | 37 °C / 2 hours                                  |
| 40  | Nup170 NTD (R284A)                          | 74-843                   | pET28a-SUMO       | BamHI, NotI                               | S                    | none                 | 37 °C / 2 hours                                  |
| 41  | Nup170 NTD (I203A)                          | 74-843                   | pET28a-SUMO       | BamHI, NotI                               | S                    | none                 | 37 °C / 2 hours                                  |
| 42  | Nup170 NTD (M239A)                          | 74-843                   | pET28a-SUMO       | BamHI, NotI                               | S                    | none                 | 37 °C / 2 hours                                  |
| 43  | Nup170 NTD (L218A)                          | 74-843                   | pET28a-SUMO       | BamHI, NotI                               | S                    | none                 | 37 °C / 2 hours                                  |
| 44  | Nup170 NTD (E214A)                          | 74-843                   | pET28a-SUMO       | BamHI, NotI                               | S                    | none                 | 37 °C / 2 hours                                  |
| 45  | Nup170 NTD (E181A)                          | 74-843                   | pET28a-SUMO       | BamHI, NotI                               | S                    | none                 | 37 °C / 2 hours                                  |
| 46  | Nup170 CTD (Y1050A)                         | 851-1402                 | pET28a-SUMO       | BamHI, NotI                               | S                    | none                 | 37 °C / 2 hours                                  |
| 47  | Nup170 CTD (V1062A)                         | 851-1402                 | pET28a-SUMO       | BamHI, NotI                               | S                    | none                 | 37 °C / 2 hours                                  |
| 48  | Nup170 CTD (L1066A)                         | 851-1402                 | pET28a-SUMO       | BamHI, NotI                               | S                    | none                 | 37 °C / 2 hours                                  |
| 49  | Nup170 CTD (E1110A)                         | 851-1402                 | pET28a-SUMO       | BamHI, NotI                               | S                    | none                 | 37 °C / 2 hours                                  |
| 50  | Nup170 CTD (L1111A)                         | 851-1402                 | pET28a-SUMO       | BamHI, NotI                               | S                    | none                 | 37 °C / 2 hours                                  |
| 51  | Nup170 CTD (I1131A)                         | 851-1402                 | pET28a-SUMO       | BamHI, NotI                               | S                    | none                 | 37 °C / 2 hours                                  |
| 52  | Nup170 CTD (I1147A)                         | 851-1402                 | pET28a-SUMO       | BamHI, NotI                               | S                    | none                 | 37 °C / 2 hours                                  |
| 53  | Nup170 CTD (Y1164A)                         | 851-1402                 | pET28a-SUMO       | BamHI, NotI                               | S                    | none                 | 37 °C / 2 hours                                  |
| 54  | Nup170 CTD (F1171A)                         | 851-1402                 | pET28a-SUMO       | BamHI, NotI                               | S                    | none                 | 37 °C / 2 hours                                  |
| 55  | Nup170 CTD (F1154A)                         | 851-1402                 | pET28a-SUMO       | BamHI, NotI                               | S                    | none                 | 37 °C / 2 hours                                  |
| 56  | Nup170 CTD (Y1157A)                         | 851-1402                 | pET28a-SUMO       | BamHI, NotI                               | S                    | none                 | 37 °C / 2 hours                                  |
| 57* | Nup170 CTD (Y905M/<br>L1007M/L1183M/V1292M) | 832-1416                 | pET28a-SUMO       | BamHI, NotI                               | S                    | none                 | 37 °C / 2 hours                                  |

| #   | Protein                            | Residues                                   | Expression vector | Restriction sites 5', 3'  | N-terminal overhang  | C-terminal overhang               | Expression conditions                                  |
|-----|------------------------------------|--------------------------------------------|-------------------|---------------------------|----------------------|-----------------------------------|--------------------------------------------------------|
| 58  | Nup145N                            | 606-993                                    | pET28a-SUMO       | BamHI, NotI               | S                    | none                              | 23 °C / 18 hours                                       |
| 59* | Nup145N APD                        | 858-993                                    | pET28a-PreS       | NdeI, XhoI                | GPHM                 | none                              | 23 °C / 18 hours                                       |
| 60* | Nup145N APD (T994A)<br>•Nup145C N  | 858-1000                                   | pET28a-PreS       | NdeI, XhoI                | GPHM                 | none                              | 23 °C / 18 hours                                       |
| 61  | Nup145N R1                         | 606-683                                    | pET28a-SUMO       | BamHI, NotI               | S                    | AAALEHHHHHH                       | 37 °C / 2 hours                                        |
| 62  | Nup145N                            | 606-750                                    | pET28a-SUMO       | BamHI, NotI               | S                    | AAALEHHHHHH                       | 37 °C / 2 hours                                        |
| 63  | Nup145N                            | 649-750                                    | pET28a-SUMO       | BamHI, NotI               | S                    | AAALEHHHHHH                       | 37 °C / 2 hours                                        |
| 64  | Nup145N R3                         | 729-750                                    | pGEX-6P-1         | BamHI, NotI               | not cleaved          | none                              | 18 °C / 18 hours                                       |
| 65  | Nup145N R3 (L733A)                 | 729-750                                    | pGEX-6P-1         | BamHI, NotI               | not cleaved          | none                              | 18 °C / 18 hours                                       |
| 66  | Nup145N R3 (V734A)                 | 729-750                                    | pGEX-6P-1         | BamHI, NotI               | not cleaved          | none                              | 18 °C / 18 hours                                       |
| 67  | Nup145N R3 (I735A)                 | 729-750                                    | pGEX-6P-1         | BamHI, NotI               | not cleaved          | none                              | 18 °C / 18 hours                                       |
| 68  | Nup145N R3 (M739A)                 | 729-750                                    | pGEX-6P-1         | BamHI, NotI               | not cleaved          | none                              | 18 °C / 18 hours                                       |
| 69  | Nup145N R3 (D742A)                 | 729-750                                    | pGEX-6P-1         | BamHI, NotI               | not cleaved          | none                              | 18 °C / 18 hours                                       |
| 70  | Nup145N R3 (L743A)                 | 729-750                                    | pGEX-6P-1         | BamHI, NotI               | not cleaved          | none                              | 18 °C / 18 hours                                       |
| 71  | Nup145N R3 (F744A)                 | 729-750                                    | pGEX-6P-1         | BamHI, NotI               | not cleaved          | none                              | 18 °C / 18 hours                                       |
| 72  | Avi-Nup192                         | 1-1756                                     | pET28a-PreS       | NdeI, NotI                |                      | GPLMSGSLNDIFEAQKI<br>EWHEGSAGGSGH | 37 °C / 2 hours                                        |
| 73* | Nup192 ΔHEAD                       | 153-1756 (Δ167-184,<br>replaced with GSGS) | pET28a-PreS       | NdeI, NotI                | GPHM                 | none                              | 37 °C / 2 hours                                        |
| 74  | Nup192 NTD                         | 1-958                                      | pET28a-PreS       | NdeI, NotI                | GPH                  | none                              | 37 °C / 2 hours                                        |
| 75  | Nup192 CTD                         | 921-1756                                   | pET28a-PreS       | NdeI, NotI                | GPHM                 | none                              | 23 °C / 18 hours                                       |
| 76  | Nup192 TAIL                        | 1397-1756                                  | pET28a-PreS       | NdeI, NotI                | GPHM                 | none                              | 37 °C / 2 hours                                        |
| 77  | Nic96                              | 110-1112                                   | pET28a-SUMO       | BamHI, NotI               | S                    | AAALEHHHHHH                       | 18 °C / 18 hours                                       |
| 78* | Nic96 SOL                          | 391-1112                                   | pET28a-SUMO       | BamHI, NotI               | S                    | none                              | 18 °C / 18 hours                                       |
| 79  | Nic96 R2Δ2                         | 274-301                                    | pET-MCN-SUMO      | BamHI, NotI               | S                    | none                              | 37 °C / 2 hours<br>coexpressed with<br>Nup188 TAIL     |
| 80  | Nic96 R2Δ4                         | 286-301                                    | pET-MCN-SUMO      | BamHI, NotI               | S                    | none                              | 37 °C / 2 hours                                        |
| 81  | Nic96 R2                           | 262-301                                    | pET-MCN-SUMO      | BamHI, NotI               | S                    | none                              | 37 °C / 2 hours                                        |
| 82  | Nic96 R2 (F275A)                   | 262-301                                    | pET-MCN-SUMO      | BamHI, NotI               | S                    | none                              | 37 °C / 2 hours                                        |
| 83  | Nic96 R2 (D276A)                   | 262-301                                    | pET-MCN-SUMO      | BamHI, NotI               | S                    | none                              | 37 °C / 2 hours                                        |
| 84  | Nic96 R2 (F278A)                   | 262-301                                    | pET-MCN-SUMO      | BamHI, NotI               | S                    | none                              | 37 °C / 2 hours                                        |
| 85  | Nic96 R2 (N282A)                   | 262-301                                    | pET-MCN-SUMO      | BamHI, NotI               | S                    | none                              | 37 °C / 2 hours                                        |
| 86  | Nic96 R2 (L285A)                   | 262-301                                    | pET-MCN-SUMO      | BamHI, NotI               | S                    | none                              | 37 °C / 2 hours                                        |
| 87  | Nic96 R2 (W287A)                   | 262-301                                    | pET-MCN-SUMO      | BamHI, NotI               | S                    | none                              | 37 °C / 2 hours                                        |
| 88  | Nic96 R2 (I294A)                   | 262-301                                    | pET-MCN-SUMO      | BamHI, NotI               | S                    | none                              | 37 °C / 2 hours                                        |
| 89  | Nic96 R2 (F298A)                   | 262-301                                    | pET-MCN-SUMO      | BamHI, NotI               | S                    | none                              | 37 °C / 2 hours                                        |
| 90  | Nic96 SOL (L715A)                  | 391-1112                                   | pET28a-SUMO       | BamHI, NotI               | S                    | none                              | 18 °C / 18 hours                                       |
| 91  | Nic96 SOL (V655A/W658A)            | 391-1112                                   | pET28a-SUMO       | BamHI, NotI               | S                    | none                              | 18 °C / 18 hours                                       |
| 92  | Nic96 SOL (F697A)                  | 391-1112                                   | pET28a-SUMO       | BamHI, NotI               | S                    | none                              | 18 °C / 18 hours                                       |
| 93  | Nup188                             | 1-1858                                     | pET28a-PreS       | Asel, BamHI               | GPHN                 | none                              | 23 °C / 18 hours                                       |
| 94  | Nup188 NTD                         | 1-1134                                     | pET28a-PreS       | Asel, BamHI               | GPHN                 | none                              | 23 °C / 18 hours                                       |
| 95  | Nup188 TAIL                        | 1447-1858                                  | pET28a-SUMO       | BamHI, NotI               | SM                   | none                              | 18 °C / 18 hours                                       |
| 96  | Nsp1<br>Nup57                      | 467-674<br>74-319                          | pETDuet1          | NcoI, NotI<br>NdeI, XhoI  | None<br>M            | none<br>none                      | 18 °C / 18 hours<br>coexpressed with<br>Nup49          |
| 97  | Nup49                              | 246-470                                    | pET28a-SUMO       | BamHI, NotI               | S                    | none                              | 18 °C / 18 hours<br>coexpressed with<br>Nsp1 and Nup57 |
| 98  | hsNup155 CTD                       | 870-1391                                   | pET28a-PreS       | NdeI, NotI                | GPHM                 | none                              | 37 °C / 2 hours                                        |
| 99  | hsNup98                            | 596-617                                    | pGEX-6P-1         | BamHI, NotI               | not cleaved          | none                              | 23 °C / 18 hours                                       |
| 100 | hsNup98 (S608E/S612E)              | 596-617                                    | pGEX-6P-1         | BamHI, NotI               | not cleaved          | none                              | 23 °C / 18 hours                                       |
| 101 | scNup159 T<br>scNup82 NTD          | 1425-1460<br>1-452                         | pETDuet1          | NcoI, NotI<br>NdeI, XhoI  | GPHM<br>none         | none<br>none                      | 18 °C / 16 hours                                       |
| 102 | scNup145C<br>scSec13               | 1-712<br>1-297                             | pETDuet1          | BamHI, NotI<br>NdeI, XhoI | MGSSHHHHHSQDP<br>N/A | none<br>none                      | 18 °C / 16 hours                                       |
| 103 | scNup53                            | 374-460                                    | pET28a-SUMO       | BamHI, NotI               | S                    | none                              | 18 °C / 16 hours                                       |
| 104 | scNup170 CTD                       | 999-1502                                   | pET28a-SUMO       | SacI, NotI                | SEFEL                | none                              | 18 °C / 8 hours                                        |
| 105 | scNup170 CTD (F1308A)              | 999-1502                                   | pET28a-SUMO       | SacI, NotI                | SEFEL                | none                              | 18 °C / 8 hours                                        |
| 106 | scNup157 CTD                       | 894-1391                                   | pET28a-SUMO       | BamHI, NotI               | S                    | none                              | 18 °C / 16 hours                                       |
| 107 | scNup157 NTD                       | 70-893                                     | pGEX-6P-1         | BamHI, NotI               | GPLGS                | none                              | 18 °C / 8 hours                                        |
| 108 | scNup157 NTD (F214A)               | 70-893                                     | pGEX-6P-1         | BamHI, NotI               | GPLGS                | none                              | 18 °C / 8 hours                                        |
| 109 | scNup100                           | 571-959                                    | pET28a-SUMO       | BamHI, NotI               | S                    | none                              | 18 °C / 16 hours                                       |
| 110 | scNup116                           | 752-1113                                   | pET28a-SUMO       | BamHI, NotI               | S                    | none                              | 18 °C / 16 hours                                       |
| 111 | scNup145N                          | 210-605                                    | pET28a-SUMO       | BamHI, NotI               | S                    | none                              | 18 °C / 16 hours                                       |
| 112 | scNup192 NTD                       | 1-960                                      | pET28a-PreS       | NdeI, NotI                | GPH                  | none                              | 21 °C / 8 hours                                        |
| 113 | scNic96 SOL<br>(I432A/W435A/Y469A) | 204-839                                    | pET28a-SUMO       | BamHI, NotI               | S                    | none                              | 18 °C / 16 hours                                       |
| 114 | scNup53                            | 1-240                                      | pET28a-SUMO       | BamHI, NotI               | S                    | none                              | 18 °C / 16 hours                                       |
| 115 | scNup188                           | 1-1655                                     | pET28a-SUMO       | BamHI, NotI               | S                    | none                              | 21 °C / 16 hours                                       |
| 116 | Nup145N PreS                       | 606-993                                    | pET28a-SUMO       | BamHI, NotI               | S                    | none                              | 23 °C / 18 hours                                       |

Proteins are from *C. thermophilum* unless otherwise noted

\* Constructs that were used for crystallization

**Table S2.****Protein purification protocols**

| Protein(s)                               | Expression constructs          | Purification step                                                                                                                      | Buffer A                                                                                                                                                                                                                 | Buffer B                                                                                                                                             |
|------------------------------------------|--------------------------------|----------------------------------------------------------------------------------------------------------------------------------------|--------------------------------------------------------------------------------------------------------------------------------------------------------------------------------------------------------------------------|------------------------------------------------------------------------------------------------------------------------------------------------------|
| <b>Avi-Nup192*</b>                       | Individual (#72)               | 1. Ni-NTA<br>2. Dialysis/Cleavage<br>3. Ni-NTA<br>4. MonoQ 10/100 GL<br>5. HiLoad Superdex 200 16/60 PG                                | 1. Ni-A1, 5 mM $\beta$ -ME<br>2. IEX-A2, pH 8.0, 5 mM $\beta$ -ME / PreS<br>3. Ni-A2, 5 mM $\beta$ -ME<br>4. IEX-A2, pH 8.0, 5 mM DTT<br>5. SEC-A, 5 mM DTT                                                              | 1. Ni-B1, 5 mM $\beta$ -ME<br>2. N/A<br>3. Ni-B1, 5 mM $\beta$ -ME<br>4. IEX-B, pH 8.0, 5 mM DTT<br>5. N/A                                           |
| <b>Nup192 <math>\Delta</math>HEAD*</b>   | Individual (#73)               | 1. Ni-NTA<br>2. Dialysis/Cleavage<br>3. Ni-NTA<br>4. MonoQ 10/100 GL<br>5. HiLoad Superdex 200 16/60 PG                                | 1. Ni-A1, 5 mM $\beta$ -ME<br>2. IEX-A2, pH 8.0, 5 mM $\beta$ -ME / PreS<br>3. Ni-A2, 5 mM $\beta$ -ME<br>4. IEX-A2, pH 8.0, 5 mM DTT<br>5. SEC-A, 5 mM DTT                                                              | 1. Ni-B1, 5 mM $\beta$ -ME<br>2. N/A<br>3. Ni-B1, 5 mM $\beta$ -ME<br>4. IEX-B, pH 8.0, 5 mM DTT<br>5. N/A                                           |
| <b>Nup192 NTD</b>                        | Individual (#74)               | 1. Ni-NTA<br>2. Dialysis/Cleavage<br>3. Ni-NTA<br>4. HiTrap Q HP<br>5. HiLoad Superdex 200 16/60 PG                                    | 1. Ni-A1, 5 mM $\beta$ -ME<br>2. Ni-A2, 5 mM $\beta$ -ME / PreS<br>3. Ni-A2, 5 mM $\beta$ -ME<br>4. IEX-A2, pH 8.0, 5 mM DTT<br>5. SEC-A, 5 mM DTT                                                                       | 1. Ni-B1, 5 mM $\beta$ -ME<br>2. N/A<br>3. Ni-B1, 5 mM $\beta$ -ME<br>4. IEX-B, pH 8.0, 5 mM DTT<br>5. N/A                                           |
| <b>Nup192 CTD</b>                        | Individual (#75)               | 1. Ni-NTA<br>2. Dialysis/Cleavage<br>3. Ni-NTA<br>4. MonoQ 10/100 GL<br>5. HiLoad Superdex 200 16/60 PG                                | 1. Ni-A1, 5 mM $\beta$ -ME<br>2. IEX-A2, pH 8.0, 5 mM $\beta$ -ME / PreS<br>3. Ni-A2, 5 mM $\beta$ -ME<br>4. IEX-A2, pH 8.0, 5 mM DTT<br>5. SEC-A, 5 mM DTT                                                              | 1. Ni-B1, 5 mM $\beta$ -ME<br>2. N/A<br>3. Ni-B1, 5 mM $\beta$ -ME<br>4. IEX-B, pH 8.0, 5 mM DTT<br>5. N/A                                           |
| <b>Nup192 TAIL</b>                       | Individual (#76)               | 1. Ni-NTA<br>2. Dialysis/Cleavage<br>3. Ni-NTA<br>4. HiLoad Superdex 200 16/60 PG                                                      | 1. Ni-A1, 5 mM $\beta$ -ME<br>2. Ni-A3, 5 mM $\beta$ -ME / PreS<br>3. Ni-A3, 5 mM $\beta$ -ME<br>4. SEC-C, 1 mM DTT                                                                                                      | 1. Ni-B1, 5 mM $\beta$ -ME<br>2. N/A<br>3. Ni-B1, 5 mM $\beta$ -ME<br>4. N/A                                                                         |
| <b>Nup188*</b>                           | Individual (#93)               | 1. Ni-NTA<br>2. Dialysis/Cleavage<br>3. Ni-NTA<br>4. HiTrap Q HP<br>5. HiLoad Superdex 200 16/60 PG<br>6. HiLoad Superdex 200 16/60 PG | 1. Ni-A1, 5 mM $\beta$ -ME<br>2. IEX-A2, pH 8.0, 5 mM $\beta$ -ME / PreS<br>3. Ni-A2, 5 mM $\beta$ -ME<br>4. IEX-A2, pH 8.0, 5 mM DTT<br>5. SEC-A, 5 mM DTT<br>6. SEC-A, 5 mM DTT                                        | 1. Ni-B1, 5 mM $\beta$ -ME<br>2. N/A<br>3. Ni-B1, 5 mM $\beta$ -ME<br>4. IEX-B, pH 8.0, 5 mM DTT<br>5. N/A<br>6. N/A                                 |
| <b>Nup188 NTD</b>                        | Individual (#94)               | 1. Ni-NTA<br>2. Dialysis/Cleavage<br>3. Ni-NTA<br>4. HiTrap Q HP<br>5. HiLoad Superdex 200 16/60 PG                                    | 1. Ni-A1, 5 mM $\beta$ -ME<br>2. Ni-A2, 5 mM $\beta$ -ME / PreS<br>3. Ni-A2, 5 mM $\beta$ -ME<br>4. IEX-A2, pH 8.0, 5 mM DTT<br>5. SEC-A, 5 mM DTT                                                                       | 1. Ni-B1, 5 mM $\beta$ -ME<br>2. N/A<br>3. Ni-B1, 5 mM $\beta$ -ME<br>4. IEX-B, pH 8.0, 5 mM DTT<br>5. N/A                                           |
| <b>Nup188 TAIL</b>                       | Individual (#95)               | 1. Ni-NTA<br>2. Dialysis/Cleavage<br>3. Ni-NTA<br>4. HiTrap Q HP<br>5. HiLoad Superdex 200 16/60 PG                                    | 1. Ni-A1, 5 mM $\beta$ -ME<br>2. Ni-A2, 5 mM $\beta$ -ME / ULP1<br>3. Ni-A2, 5 mM $\beta$ -ME<br>4. IEX-A2, pH 8.0, 5 mM DTT<br>5. SEC-A, 5 mM DTT                                                                       | 1. Ni-B1, 5 mM $\beta$ -ME<br>2. N/A<br>3. Ni-B1, 5 mM $\beta$ -ME<br>4. IEX-B, pH 8.0, 5 mM DTT<br>5. N/A                                           |
| <b>Nic96 SOL* wild-type and mutants</b>  | Individual (#78, 82-92)        | 1. Ni-NTA<br>2. HiPrep 26/20 Desalting/Cleavage<br>3. Ni-NTA<br>4. HiLoad Superdex 200 16/60 PG                                        | 1. Ni-A1, 5 mM $\beta$ -ME<br>2. IEX-A2, pH 8.0, 5 mM $\beta$ -ME / ULP1<br>3. Ni-A2, 5 mM $\beta$ -ME<br>4. SEC-A, 5 mM DTT                                                                                             | 1. Ni-B1, 5 mM $\beta$ -ME<br>2. N/A<br>3. Ni-B1, 5 mM $\beta$ -ME<br>4. N/A                                                                         |
| <b>Nup170*</b>                           | Individual (#27)               | 1. Ni-NTA<br>2. Dialysis/Cleavage<br>3. Ni-NTA<br>4. HiTrap Q HP<br>5. HiLoad Superdex 200 16/60 PG                                    | 1. Ni-A1, 5 mM $\beta$ -ME, 5 % Glycerol<br>2. Ni-A3, 5 mM $\beta$ -ME, 5 % Glycerol / ULP1<br>3. Ni-A3, 5 mM $\beta$ -ME, 5 % Glycerol<br>4. IEX-A4, pH 8.0, 5 mM DTT, 5 % Glycerol<br>5. SEC-C, 5 mM DTT, 5 % Glycerol | 1. Ni-B1, 5 mM $\beta$ -ME, 5 % Glycerol<br>2. N/A<br>3. Ni-B1, 5 mM $\beta$ -ME, 5 % Glycerol<br>4. IEX-B, pH 8.0, 5 mM DTT, 5 % Glycerol<br>5. N/A |
| <b>Nup170 SOL*</b>                       | Individual (#29)               | 1. Ni-NTA<br>2. Dialysis/Cleavage (48 hr)<br>3. Ni-NTA<br>4. HiTrap Q HP<br>5. HiLoad Superdex 200 16/60 PG                            | 1. Ni-A1, 5 mM $\beta$ -ME,<br>2. Ni-A3, 5 mM $\beta$ -ME / ULP1<br>3. Ni-A3, 5 mM $\beta$ -ME<br>4. IEX-A4, pH 8.0, 5 mM DTT<br>5. SEC-C, 5 mM DTT                                                                      | 1. Ni-B1, 5 mM $\beta$ -ME<br>2. N/A<br>3. Ni-B1, 5 mM $\beta$ -ME<br>4. IEX-B, pH 8.0, 5 mM DTT<br>5. N/A                                           |
| <b>Nup170 NTD* wild-type and mutants</b> | Individual (#32-47, 39-45)     | 1. Ni-NTA<br>2. Dialysis/Cleavage<br>3. Ni-NTA<br>4. HiTrap Q HP<br>5. HiLoad Superdex 200 16/60 PG                                    | 1. Ni-A1, 5 mM $\beta$ -ME, 5 % Glycerol<br>2. Ni-A3, 5 mM $\beta$ -ME, 5 % Glycerol / ULP1<br>3. Ni-A3, 5 mM $\beta$ -ME, 5 % Glycerol<br>4. IEX-A2, pH 8.0, 5 mM DTT, 5 % Glycerol<br>5. SEC-C, 5 mM DTT, 5 % Glycerol | 1. Ni-B1, 5 mM $\beta$ -ME, 5 % Glycerol<br>2. N/A<br>3. Ni-B1, 5 mM $\beta$ -ME, 5 % Glycerol<br>4. IEX-B, pH 8.0, 5 mM DTT, 5 % Glycerol<br>5. N/A |
| <b>Nup170 CTD* wild-type and mutants</b> | Individual (#30-31, 38, 46-57) | 1. Ni-NTA<br>2. HiPrep 26/20 Desalting/Cleavage<br>3. Ni-NTA<br>4. HiTrap Q HP<br>5. HiLoad Superdex 200 16/60 PG                      | 1. Ni-A1, 5 mM $\beta$ -ME<br>2. Ni-A2, 5 mM $\beta$ -ME / ULP1<br>3. Ni-A2, 5 mM $\beta$ -ME<br>4. IEX-A2, pH 8.0, 5 mM DTT<br>5. SEC-A, 5 mM DTT                                                                       | 1. Ni-B1, 5 mM $\beta$ -ME<br>2. N/A<br>3. Ni-B1, 5 mM $\beta$ -ME<br>4. IEX-B, pH 8.0, 5 mM DTT<br>5. N/A                                           |
| <b>hsNup155 CTD</b>                      | Individual (#98)               | 1. Ni-NTA<br>2. HiPrep 26/20 Desalting/Cleavage<br>3. Ni-NTA<br>4. HiTrap Q HP<br>5. HiLoad Superdex 200 16/60 PG                      | 1. Ni-A1, 5 mM $\beta$ -ME, 5 % Glycerol<br>2. Ni-A3, 5 mM $\beta$ -ME, 5 % Glycerol / PreS<br>3. Ni-A3, 5 mM $\beta$ -ME, 5 % Glycerol<br>4. IEX-A3, pH 8.0, 5 mM DTT, 5 % Glycerol<br>5. SEC-B, 5 mM DTT, 5 % Glycerol | 1. Ni-B1, 5 mM $\beta$ -ME, 5 % Glycerol<br>2. N/A<br>3. Ni-B1, 5 mM $\beta$ -ME, 5 % Glycerol<br>4. IEX-B, pH 8.0, 5 mM DTT, 5 % Glycerol<br>5. N/A |
| <b>Nup120•Nup37•ELYS*</b>                | Co-expression (#3)             | 1. Ni-NTA<br>2. Dialysis/Cleavage<br>3. HiTrap Q HP<br>4. HiLoad Superdex 200 16/60 PG                                                 | 1. Ni-A1, 5 mM $\beta$ -ME, 5 % Glycerol<br>2. Ni-A3, 5 mM DTT, 5 % Glycerol / ULP1-PreS<br>3. IEX-A4, pH 8.0, 5 mM DTT, 5 % Glycerol<br>4. SEC-A, 5 mM DTT                                                              | 1. Ni-B1, 5 mM $\beta$ -ME, 5 % Glycerol<br>2. N/A<br>3. IEX-B, pH 8.0, 5 mM DTT, 5 % Glycerol<br>4. N/A                                             |
| <b>Nup85*</b>                            | Individual (#4)                | 1. Ni-NTA<br>2. Dialysis/Cleavage<br>3. HiTrap Q HP<br>4. HiLoad Superdex 200 16/60 PG                                                 | 1. Ni-A1, 5 mM $\beta$ -ME<br>2. Ni-A2, 5 mM DTT / PreS<br>3. IEX-A2, pH 8.0, 5 mM DTT<br>4. SEC-A, 5 mM DTT                                                                                                             | 1. Ni-B1, 5 mM $\beta$ -ME, 5 % Glycerol<br>2. N/A<br>3. IEX-B, pH 8.0, 5 mM DTT<br>4. N/A                                                           |
| <b>Sec13•Nup145C*</b>                    | Co-expression (#5, 6)          | 1. Ni-NTA<br>2. HiPrep 26/20 Desalting /Cleavage<br>3. Ni-NTA<br>4. HiLoad Superdex 200 16/60 PG                                       | 1. Ni-A1, 5 mM $\beta$ -ME<br>2. Ni-A2, 5 mM $\beta$ -ME / ULP1<br>3. Ni-A2, 5 mM $\beta$ -ME<br>4. SEC-A, 5 mM DTT                                                                                                      | 1. Ni-B1, 5 mM $\beta$ -ME<br>2. N/A<br>3. Ni-B2, 5 mM $\beta$ -ME<br>4. N/A                                                                         |

| Protein(s)                                                           | Expression constructs                       | Purification step                                                                                                                               | Buffer A                                                                                                                                                                                                                                         | Buffer B                                                                                                            |
|----------------------------------------------------------------------|---------------------------------------------|-------------------------------------------------------------------------------------------------------------------------------------------------|--------------------------------------------------------------------------------------------------------------------------------------------------------------------------------------------------------------------------------------------------|---------------------------------------------------------------------------------------------------------------------|
| <b>Nup84-Nup133*</b>                                                 | Co-expression (#7, 8)                       | 1. Ni-NTA<br>2. Dialysis<br>3. HiLoad Superdex 200 16/60 PG<br>4. MonoQ 10/100 GL                                                               | 1. Ni-A1, 5 mM $\beta$ -ME<br>2. SEC-A, 5 mM DTT<br>3. SEC-A, 5 mM DTT<br>4. IEX-A2, pH 8.0, 5 mM DTT                                                                                                                                            | 1. Ni-B1, 5 mM $\beta$ -ME<br>2. N/A<br>3. N/A<br>4. IEX-B, pH 8.0, 5 mM DTT                                        |
| <b>Nup84-Nup133 <math>\Delta</math>NTE</b>                           | Co-expression (#7, 9)                       | 1. Ni-NTA<br>2. Dialysis<br>3. HiLoad Superdex 200 16/60 PG<br>4. MonoQ 10/100 GL                                                               | 1. Ni-A1, 5 mM $\beta$ -ME<br>2. SEC-A, 5 mM DTT<br>3. SEC-A, 5 mM DTT<br>4. IEX-A2, pH 8.0, 5 mM DTT                                                                                                                                            | 1. Ni-B1, 5 mM $\beta$ -ME<br>2. N/A<br>3. N/A<br>4. IEX-B, pH 8.0, 5 mM DTT                                        |
| <b>Nup145N*</b><br>wild-type and PreS                                | Individual (#58, 116)                       | 1. Ni-NTA<br>2. HiPrep 26/20 Desalting/Cleavage<br>3. MonoS 5/50 GL<br>4. HiLoad Superdex 75 16/60 PG                                           | 1. Ni-A1, 5 mM $\beta$ -ME<br>2. IEX-A2, pH 7.0, 5 mM DTT / ULP1<br>3. IEX-A2, pH 7.0, 5 mM DTT<br>4. SEC-A, 5 mM DTT                                                                                                                            | 1. Ni-B1, 5 mM $\beta$ -ME<br>2. N/A<br>3. IEX-B, pH 7.0, 5 mM DTT<br>4. N/A                                        |
| <b>Nup145N APD*</b>                                                  | Individual (#59)                            | 1. Ni-NTA<br>2. Dialysis/cleavage<br>3. Ni-NTA<br>4. HiLoad Superdex 75 16/60 PG                                                                | 1. Ni-A1, 5 mM $\beta$ -ME<br>2. Ni-A2, pH 8.0, 5 mM $\beta$ -ME / PreS<br>3. Ni-A2, 5 mM $\beta$ -ME<br>4. SEC-A, 5 mM DTT                                                                                                                      | 1. Ni-B1, 5 mM $\beta$ -ME<br>2. N/A<br>3. Ni-B1, 5 mM $\beta$ -ME<br>4. N/A                                        |
| <b>GST-Nup145N</b><br>wild-type and mutants                          | Individual (#64, 65-71)                     | 1. GST Affinity<br>2. HiTrap Q HP<br>3. HiLoad Superdex 200 16/60 PG                                                                            | 1. GST-A, 5 mM DTT<br>2. IEX-A2, pH 8.0, 5 mM DTT<br>3. SEC-A, 5 mM DTT                                                                                                                                                                          | 1. GST-B, 5mM DTT<br>2. IEX-B, pH 8.0, 5 mM DTT<br>3. N/A                                                           |
| <b>GST-hsNup98</b><br>wild-type and mutant                           | Individual (#99, 100)                       | 1. GST Affinity<br>2. HiTrap Q HP<br>3. HiLoad Superdex 200 16/60 PG                                                                            | 1. GST-A, 5 mM DTT<br>2. IEX-A2, pH 8.0, 5 mM DTT<br>3. SEC-A, 5 mM DTT                                                                                                                                                                          | 1. GST-B, 5mM DTT<br>2. IEX-B, pH 8.0, 5 mM DTT<br>3. N/A                                                           |
| <b>SUMO-Nup145N</b><br>various fragments                             | Individual (#61-63)                         | 1. Ni-NTA<br>2. HiPrep 26/20 Desalting /Cleavage<br>3. Ni-NTA<br>4. HiLoad Superdex 200 16/60 PG                                                | 1. Ni-A1, 5 mM $\beta$ -ME<br>2. Ni-A2, 5 mM $\beta$ -ME / ULP1<br>3. Ni-A2, 5 mM $\beta$ -ME<br>4. SEC-A, 5 mM DTT                                                                                                                              | 1. Ni-B1, 5 mM $\beta$ -ME<br>2. N/A<br>3. Ni-B2, 5 mM $\beta$ -ME<br>4. N/A                                        |
| <b>Nup53*</b>                                                        | Individual (#10)                            | 1. Ni-NTA<br>2. HiPrep 26/20 Desalting/Cleavage<br>3. Ni-NTA<br>4. HiPrep 26/20 Desalting<br>5. MonoS 5/50 GL<br>6. HiLoad Superdex 75 16/60 PG | 1. Ni-A1, 5 mM $\beta$ -ME<br>2. Ni-A1, 5 mM $\beta$ -ME / ULP1<br>3. Ni-A1, 5 mM $\beta$ -ME<br>4. IEX-A2, pH 7.0, 5 mM DTT<br>5. IEX-A2, pH 7.0, 5 mM DTT<br>6. SEC-A, 5 mM DTT                                                                | 1. Ni-B1, 5 mM $\beta$ -ME<br>2. N/A<br>3. Ni-B1, 5 mM $\beta$ -ME<br>4. N/A<br>5. EX-B, pH 7.0, 5 mM DTT<br>6. N/A |
| <b>Nup53 RRM*</b>                                                    | Individual (#11)                            | 1. Ni-NTA<br>2. Desalting/Cleavage<br>3. Ni-NTA<br>4. HiLoad Superdex 75 16/60 PG                                                               | 1. Ni-A1, 5 mM $\beta$ -ME<br>2. Ni-A2, pH 8.0, 5 mM $\beta$ -ME / PreS<br>3. Ni-A2, 5 mM $\beta$ -ME<br>4. SEC-A, 5 mM DTT                                                                                                                      | 1. Ni-B1, 5 mM $\beta$ -ME<br>2. N/A<br>3. Ni-B1, 5 mM $\beta$ -ME<br>4. N/A                                        |
| <b>SUMO-Nup53</b><br>various fragments                               | Individual (#12-15)                         | 1. Ni-NTA<br>2. HiPrep 26/20 Desalting<br>3. HiLoad Superdex 75 16/60 PG                                                                        | 1. Ni-A1, 5 mM $\beta$ -ME<br>2. SEC-A, 5 mM DTT<br>3. SEC-A, 5 mM DTT                                                                                                                                                                           | 1. Ni-B1, 5 mM $\beta$ -ME<br>2. N/A<br>3. N/A                                                                      |
| <b>GST-Nup53 R3</b><br>wild-type and mutants                         | Individual (#16, 17-26)                     | 1. GST Affinity<br>2. HiTrap Q HP<br>3. HiLoad Superdex 200 16/60 PG                                                                            | 1. GST-A, 5 mM DTT<br>2. IEX-A2, pH 8.0, 5 mM DTT<br>3. SEC-A, 5 mM DTT                                                                                                                                                                          | 1. GST-B, 5mM DTT<br>2. IEX-B, pH 8.0, 5 mM DTT<br>3. N/A                                                           |
| <b>CNT</b>                                                           | Co-expression (#96, 97)                     | 1. Ni-NTA<br>2. HiPrep 26/20 Desalting/Cleavage<br>3. Ni-NTA<br>4. HiTrap Q HP<br>5. HiLoad Superdex 200 16/60 PG                               | 1. Ni-A1, 4 mM $\beta$ -ME<br>2. Ni-A2, 4 mM $\beta$ -ME / ULP1<br>3. Ni-A2, 4 mM $\beta$ -ME<br>4. IEX-A2, pH 8.0, 5 mM DTT<br>5. SEC-A, 5 mM DTT                                                                                               | 1. Ni-B1, 4 mM $\beta$ -ME<br>2. N/A<br>3. Ni-B1, 4 mM $\beta$ -ME<br>4. IEX-B, pH 8.0, 5 mM DTT<br>5. N/A          |
| <b>Nup82 NTD*</b><br><b>SUMO-Nup159 T</b>                            | Individual (#1, 2)<br>co-lysis<br>ratio 1:1 | 1. Ni-NTA<br>2. Dialysis/Cleavage<br>3. Ni-NTA<br>4. HiLoad Superdex 200 16/60 PG                                                               | 1. Ni-A1, 5 mM $\beta$ -ME<br>2. Ni-A1, 5 mM $\beta$ -ME / PreS / ULP1<br>3. Ni-A1, 5 mM $\beta$ -ME<br>4. SEC-A, 5 mM DTT                                                                                                                       | 1. Ni-B1, 4 mM $\beta$ -ME<br>2. N/A<br>3. Ni-B1, 4 mM $\beta$ -ME<br>4. N/A                                        |
| <b>His<sub>6</sub>-Nup192 TAIL</b>                                   | Individual (#76)                            | 1. Ni-NTA<br>2. Dialysis<br>3. HiTrap Q HP<br>4. HiLoad Superdex 200 16/60 PG                                                                   | 1. Ni-A1, 5 mM $\beta$ -ME<br>2. IEX-A1, pH 9.0, 1 mM DTT<br>3. IEX-A1, pH 9.0, 1 mM DTT<br>4. SEC-C, 1 mM DTT                                                                                                                                   | 1. Ni-B1, 5 mM $\beta$ -ME<br>2. N/A<br>3. IEX-B, pH 9.0, 1 mM DTT<br>4. N/A                                        |
| <b>SUMO-Nup188 TAIL</b>                                              | Individual (#95)                            | 1. Ni-NTA<br>2. Dialysis<br>3. MonoQ 10/100 GL<br>4. HiLoad Superdex 200 16/60 PG                                                               | 1. Ni-A1, 5 mM $\beta$ -ME<br>2. IEX-A2, pH 8.0, 1 mM DTT<br>3. IEX-A2, pH 8.0, 1 mM DTT<br>4. SEC-C, 1 mM DTT                                                                                                                                   | 1. Ni-B1, 5 mM $\beta$ -ME<br>2. N/A<br>3. IEX-B, pH 8.0, 1 mM DTT<br>4. N/A                                        |
| <b>SUMO-Nup188 TAIL*</b><br><b>SUMO-Nic96-R2<math>\Delta</math>2</b> | Co-expression (#95, 79)                     | 1. Ni-NTA<br>2. Dialysis<br>3. HiTrap Q HP<br>4. HiLoad Superdex 200 16/60 PG                                                                   | 1. Ni-A1, 5 mM $\beta$ -ME<br>2. IEX-A2, pH 8.0, 1 mM DTT<br>3. IEX-A2, pH 8.0, 1 mM DTT<br>4. SEC-C, 1 mM DTT                                                                                                                                   | 1. Ni-B1, 5 mM $\beta$ -ME<br>2. N/A<br>3. IEX-B, pH 8.0, 1 mM DTT<br>4. N/A                                        |
| <b>SUMO-Nic96 R2</b>                                                 | Individual (#81)                            | 1. Ni-NTA<br>2. Dialysis<br>3. HiTrap Q HP<br>4. HiLoad Superdex 75 16/60 PG                                                                    | 1. Ni-A1, 5 mM $\beta$ -ME<br>2. IEX-A2, pH 8.0, 1 mM DTT<br>3. IEX-A2, pH 8.0, 1 mM DTT<br>4. SEC-C, 1 mM DTT                                                                                                                                   | 1. Ni-B1, 5 mM $\beta$ -ME<br>2. N/A<br>3. IEX-B, pH 8.0, 1 mM DTT<br>4. N/A                                        |
| <b>SUMO-Nic96 R2<math>\Delta</math>4</b>                             | Individual (#80)                            | 1. Ni-NTA<br>2. Dialysis<br>3. HiTrap Q HP<br>4. HiLoad Superdex 75 16/60 PG                                                                    | 1. Ni-A1, 5 mM $\beta$ -ME<br>2. IEX-A2, pH 8.0, 5 mM $\beta$ -ME<br>3. IEX-A2, pH 8.0, 1 mM DTT<br>4. SEC-C, 1 mM DTT                                                                                                                           | 1. Ni-B1, 5 mM $\beta$ -ME<br>2. N/A<br>3. IEX-B, pH 8.0, 1 mM DTT<br>4. N/A                                        |
| <b>SUMO-scNup53</b>                                                  | Individual (#103)                           | 1. Ni-NTA<br>2. Dialysis<br>3. HiTrap Q HP<br>4. HiLoad Superdex 200 16/60 PG                                                                   | 1. Ni-A4, 4 mM $\beta$ -ME, 5 % Glycerol<br>2. IEX-A3, pH 8.0, 4 mM $\beta$ -ME, 5 % Glycerol<br>3. IEX-A3, pH 8.0, 4 mM $\beta$ -ME, 5 % Glycerol<br>4. SEC-B, 5 mM DTT, 5 % Glycerol                                                           | 1. Ni-B1, 4 mM $\beta$ -ME<br>2. N/A<br>3. IEX-B, pH 8.0, 4 mM $\beta$ -ME<br>4. N/A                                |
| <b>scNup100</b>                                                      | Individual (#109)                           | 1. Ni-NTA<br>2. Dialysis/Cleavage<br>3. Ni-NTA<br>4. HiTrap Q HP<br>5. HiLoad Superdex 200 16/60 PG                                             | 1. Ni-A4, 4 mM $\beta$ -ME, 5 % Glycerol<br>2. IEX-A3, pH 8.0, 4 mM $\beta$ -ME, 5 % Glycerol / ULP1<br>3. IEX-A3, pH 8.0, 4 mM $\beta$ -ME 5 % Glycerol<br>4. IEX-A3, pH 8.0, 4 mM $\beta$ -ME 5 % Glycerol<br>5. SEC-B, 5 mM DTT, 5 % Glycerol | 1. Ni-B1, 4 mM $\beta$ -ME<br>2. N/A<br>3. Ni-B1, 4 mM $\beta$ -ME<br>4. IEX-B, pH 8.0, 4 mM $\beta$ -ME<br>5. N/A  |
| <b>SUMO-scNup100</b>                                                 | Individual (#109)                           | 1. Ni-NTA<br>2. Dialysis<br>3. HiTrap Q HP<br>4. HiLoad Superdex 200 16/60 PG                                                                   | 1. Ni-A4, 4 mM $\beta$ -ME, 5 % Glycerol<br>2. IEX-A3, pH 8.0, 4 mM $\beta$ -ME, 5 % Glycerol<br>3. IEX-A3, pH 8.0, 4 mM $\beta$ -ME, 5 % Glycerol<br>4. SEC-B, 5 mM DTT, 5 % Glycerol                                                           | 1. Ni-B1, 4 mM $\beta$ -ME<br>2. N/A<br>3. IEX-B, pH 8.0, 4 mM $\beta$ -ME<br>4. N/A                                |

| Protein(s)                        | Expression constructs             | Purification step                                                                                   | Buffer A                                                                                                                                                                                                                                         | Buffer B                                                                                                           |
|-----------------------------------|-----------------------------------|-----------------------------------------------------------------------------------------------------|--------------------------------------------------------------------------------------------------------------------------------------------------------------------------------------------------------------------------------------------------|--------------------------------------------------------------------------------------------------------------------|
| scNup116                          | Individual (#110)                 | 1. Ni-NTA<br>2. Dialysis/Cleavage<br>3. Ni-NTA<br>4. HiTrap Q HP<br>5. HiLoad Superdex 200 16/60 PG | 1. Ni-A4, 4 mM $\beta$ -ME, 5 % Glycerol<br>2. IEX-A3, pH 8.0, 4 mM $\beta$ -ME, 5 % Glycerol / ULP1<br>3. IEX-A3, pH 8.0, 4 mM $\beta$ -ME 5 % Glycerol<br>4. IEX-A3, pH 8.0, 4 mM $\beta$ -ME 5 % Glycerol<br>5. SEC-B, 5 mM DTT, 5 % Glycerol | 1. Ni-B1, 4 mM $\beta$ -ME<br>2. N/A<br>3. Ni-B1, 4 mM $\beta$ -ME<br>4. IEX-B, pH 8.0, 4 mM $\beta$ -ME<br>5. N/A |
| scNup145N                         | Individual (#111)                 | 1. Ni-NTA<br>2. Dialysis/Cleavage<br>3. Ni-NTA<br>4. HiTrap Q HP<br>5. HiLoad Superdex 200 16/60 PG | 1. Ni-A4, 4 mM $\beta$ -ME, 5 % Glycerol<br>2. IEX-A3, pH 8.0, 4 mM $\beta$ -ME, 5 % Glycerol / ULP1<br>3. IEX-A3, pH 8.0, 4 mM $\beta$ -ME 5 % Glycerol<br>4. IEX-A3, pH 8.0, 4 mM $\beta$ -ME 5 % Glycerol<br>5. SEC-B, 5 mM DTT, 5 % Glycerol | 1. Ni-B1, 4 mM $\beta$ -ME<br>2. N/A<br>3. Ni-B1, 4 mM $\beta$ -ME<br>4. IEX-B, pH 8.0, 4 mM $\beta$ -ME<br>5. N/A |
| SUMO-scNup145N                    | Individual (#111)                 | 1. Ni-NTA<br>2. Dialysis<br>3. HiTrap Q HP<br>4. HiLoad Superdex 200 16/60 PG                       | 1. Ni-A4, 4 mM $\beta$ -ME, 5 % Glycerol<br>2. IEX-A3, pH 8.0, 4 mM $\beta$ -ME, 5 % Glycerol<br>3. IEX-A3, pH 8.0, 4 mM $\beta$ -ME, 5 % Glycerol<br>4. SEC-B, 5 mM DTT, 5 % Glycerol                                                           | 1. Ni-B1, 4 mM $\beta$ -ME<br>2. N/A<br>3. IEX-B, pH 8.0, 4 mM $\beta$ -ME<br>4. N/A                               |
| scNup188                          | Individual (#115)                 | 1. Ni-NTA<br>2. Dialysis/Cleavage<br>3. Ni-NTA<br>4. HiTrap Q HP<br>5. HiLoad Superdex 200 16/60 PG | 1. Ni-A4, 4 mM $\beta$ -ME, 5 % Glycerol<br>2. IEX-A2, pH 8.0, 4 mM $\beta$ -ME, 5 % Glycerol / ULP1<br>3. IEX-A2, pH 8.0, 4 mM $\beta$ -ME 5 % Glycerol<br>4. IEX-A2, pH 8.0, 4 mM $\beta$ -ME 5 % Glycerol<br>5. SEC-A, 5 mM DTT, 5 % Glycerol | 1. Ni-B1, 4 mM $\beta$ -ME<br>2. N/A<br>3. Ni-B1, 4 mM $\beta$ -ME<br>4. IEX-B, pH 8.0, 4 mM $\beta$ -ME<br>5. N/A |
| scNup192 NTD                      | Individual (#112)                 | 1. Ni-NTA<br>2. Dialysis/Cleavage<br>3. Ni-NTA<br>4. HiTrap Q HP<br>5. HiLoad Superdex 200 16/60 PG | 1. Ni-A4, 4 mM $\beta$ -ME, 5 % Glycerol<br>2. IEX-A2, pH 8.0, 4 mM $\beta$ -ME, 5 % Glycerol / PreS<br>3. IEX-A2, pH 8.0, 4 mM $\beta$ -ME 5 % Glycerol<br>4. IEX-A2, pH 8.0, 4 mM $\beta$ -ME 5 % Glycerol<br>5. SEC-A, 5 mM DTT, 5 % Glycerol | 1. Ni-B1, 4 mM $\beta$ -ME<br>2. N/A<br>3. Ni-B1, 4 mM $\beta$ -ME<br>4. IEX-B, pH 8.0, 4 mM $\beta$ -ME<br>5. N/A |
| scNup170 CTD wild-type and mutant | Individual (#104, 105)            | 1. Ni-NTA<br>2. Dialysis/Cleavage<br>3. Ni-NTA<br>4. HiTrap Q HP<br>5. HiLoad Superdex 200 16/60 PG | 1. Ni-A4, 4 mM $\beta$ -ME, 5 % Glycerol<br>2. IEX-A4, pH 8.0, 4 mM $\beta$ -ME, 5 % Glycerol / ULP1<br>3. IEX-A4, pH 8.0, 4 mM $\beta$ -ME 5 % Glycerol<br>4. IEX-A4, pH 8.0, 4 mM $\beta$ -ME 5 % Glycerol<br>5. SEC-C, 5 mM DTT, 5 % Glycerol | 1. Ni-B1, 4 mM $\beta$ -ME<br>2. N/A<br>3. Ni-B1, 4 mM $\beta$ -ME<br>4. IEX-B, pH 8.0, 4 mM $\beta$ -ME<br>5. N/A |
| SUMO-scNup170 CTD                 | Individual (#104)                 | 1. Ni-NTA<br>2. Dialysis<br>3. HiTrap Q HP<br>4. HiLoad Superdex 200 16/60 PG                       | 1. Ni-A4, 4 mM $\beta$ -ME, 5 % Glycerol<br>2. IEX-A4, pH 8.0, 4 mM $\beta$ -ME, 5 % Glycerol<br>3. IEX-A4, pH 8.0, 4 mM $\beta$ -ME 5 % Glycerol<br>4. SEC-C, 5 mM DTT, 5 % Glycerol                                                            | 1. Ni-B1, 4 mM $\beta$ -ME<br>2. N/A<br>3. IEX-B, pH 8.0, 4 mM $\beta$ -ME<br>4. N/A                               |
| scNup157 CTD                      | Individual (#106)                 | 1. Ni-NTA<br>2. Dialysis/Cleavage<br>3. Ni-NTA<br>4. HiTrap Q HP<br>5. HiLoad Superdex 200 16/60 PG | 1. Ni-A4, 4 mM $\beta$ -ME, 5 % Glycerol<br>2. IEX-A4, pH 8.0, 4 mM $\beta$ -ME, 5 % Glycerol / ULP1<br>3. IEX-A4, pH 8.0, 4 mM $\beta$ -ME 5 % Glycerol<br>4. IEX-A4, pH 8.0, 4 mM $\beta$ -ME 5 % Glycerol<br>5. SEC-C, 5 mM DTT, 5 % Glycerol | 1. Ni-B1, 4 mM $\beta$ -ME<br>2. N/A<br>3. Ni-B1, 4 mM $\beta$ -ME<br>4. IEX-B, pH 8.0, 4 mM $\beta$ -ME<br>5. N/A |
| SUMO-scNup157 CTD                 | Individual (#106)                 | 1. Ni-NTA<br>2. Dialysis<br>3. HiTrap Q HP<br>4. HiLoad Superdex 200 16/60 PG                       | 1. Ni-A4, 4 mM $\beta$ -ME, 5 % Glycerol<br>2. IEX-A4, pH 8.0, 4 mM $\beta$ -ME, 5 % Glycerol<br>3. IEX-A4, pH 8.0, 4 mM $\beta$ -ME 5 % Glycerol<br>4. SEC-C, 5 mM DTT, 5 % Glycerol                                                            | 1. Ni-B1, 4 mM $\beta$ -ME<br>2. N/A<br>3. IEX-B, pH 8.0, 4 mM $\beta$ -ME<br>4. N/A                               |
| scNup82 NTD+ scNup159 T           | Co-expression (#101)              | 1. Ni-NTA<br>2. Dialysis/Cleavage<br>3. Ni-NTA<br>4. HiTrap Q HP<br>5. HiLoad Superdex 200 16/60 PG | 1. Ni-A4, 4 mM $\beta$ -ME, 5 % Glycerol<br>2. IEX-A2, pH 8.0, 4 mM $\beta$ -ME, 5 % Glycerol / ULP1<br>3. IEX-A2, pH 8.0, 4 mM $\beta$ -ME 5 % Glycerol<br>4. IEX-A2, pH 8.0, 4 mM $\beta$ -ME 5 % Glycerol<br>5. SEC-A, 5 mM DTT, 5 % Glycerol | 1. Ni-B1, 4 mM $\beta$ -ME<br>2. N/A<br>3. Ni-B1, 4 mM $\beta$ -ME<br>4. IEX-B, pH 8.0, 4 mM $\beta$ -ME<br>5. N/A |
| scSec13+scNup145C                 | Co-expression (#103)              | 1. Ni-NTA<br>2. Dialysis/Cleavage<br>3. Ni-NTA<br>4. HiTrap Q HP<br>5. HiLoad Superdex 200 16/60 PG | 1. Ni-A4, 4 mM $\beta$ -ME, 5 % Glycerol<br>2. IEX-A2, pH 8.0, 4 mM $\beta$ -ME, 5 % Glycerol / ULP1<br>3. IEX-A2, pH 8.0, 4 mM $\beta$ -ME 5 % Glycerol<br>4. IEX-A2, pH 8.0, 4 mM $\beta$ -ME 5 % Glycerol<br>5. SEC-A, 5 mM DTT, 5 % Glycerol | 1. Ni-B1, 4 mM $\beta$ -ME<br>2. N/A<br>3. Ni-B1, 4 mM $\beta$ -ME<br>4. IEX-B, pH 8.0, 4 mM $\beta$ -ME<br>5. N/A |
| scNic96 SOL triple mutant         | Individual (#113)                 | 1. Ni-NTA<br>2. HiPrep 26/20 Desalting/Cleavage<br>3. HiLoad Superdex 200 16/60 PG                  | 1. Ni-A1, 4 mM $\beta$ -ME<br>2. SEC-A, 5 mM DTT / ULP1<br>3. SEC-A, 5 mM DTT                                                                                                                                                                    | 1. Ni-B1, 4 mM $\beta$ -ME<br>2. N/A<br>3. N/A                                                                     |
| SUMO-scNup53                      | Individual (#114)                 | 1. Ni-NTA<br>2. Dialysis<br>3. HiTrap Q HP<br>4. HiLoad Superdex 75 16/60 PG                        | 1. Ni-A1, 4 mM $\beta$ -ME<br>2. IEX-A1, pH 8.0, 5 mM DTT<br>3. IEX-A1, pH 8.0, 5 mM DTT<br>4. SEC-A, 5 mM DTT                                                                                                                                   | 1. Ni-B1, 4 mM $\beta$ -ME<br>2. N/A<br>3. IEX-B, pH 8.0, 5 mM DTT<br>4. N/A                                       |
| scNup157 NTD wild-type and mutant | Individual (#107-108)             | Detailed description in SI methods                                                                  |                                                                                                                                                                                                                                                  |                                                                                                                    |
| Nic96-CNT                         | Individual (#77, 96, 97) co-lysis | Detailed description in SI methods                                                                  |                                                                                                                                                                                                                                                  |                                                                                                                    |

♦ Constructs that were used for crystallization

\* Detailed purification provided in supplementary figures

Ni-A1: 20 mM TRIS (pH 8.0), 500 mM NaCl, 20 mM imidazole  
Ni-A2: 20 mM TRIS (pH 8.0), 100 mM NaCl, 20 mM imidazole  
Ni-A3: 20 mM TRIS (pH 8.0), 200 mM NaCl, 20 mM imidazole  
Ni-A4: 75 mM TRIS (pH 8.0), 500 mM NaCl, 20 mM imidazole  
Ni-B1: 20 mM TRIS (pH 8.0), 500 mM NaCl, 500 mM imidazole  
Ni-B2: 20 mM TRIS (pH 8.0), 100 mM NaCl, 500 mM imidazole

GST-A: 20 mM TRIS (pH 8.0), 200 mM NaCl  
GST-B: 20 mM TRIS (pH 8.0), 200 mM NaCl, 20 mM glutathione

IEX-A1: 20 mM TRIS, 50 mM NaCl  
IEX-A2: 20 mM TRIS, 100 mM NaCl  
IEX-A3: 20 mM TRIS, 150 mM NaCl  
IEX-A4: 20 mM TRIS, 200 mM NaCl  
IEX-B: 20 mM TRIS, 2.0 M NaCl

SEC-A: 20 mM TRIS (pH 8.0), 100 mM NaCl  
SEC-B: 20 mM TRIS (pH 8.0), 150 mM NaCl  
SEC-C: 20 mM TRIS (pH 8.0), 200 mM NaCl

**Table S3.**

**SEC-MALS analysis**

| Figure              | Nucleoporin or nucleoporin complex                                     | Experimental mass (kDa) | Theoretical mass (kDa) | Stoichiometry       |
|---------------------|------------------------------------------------------------------------|-------------------------|------------------------|---------------------|
| fig. S3A            | Nup192•Nup145N•Nup53                                                   | 250                     | 278                    |                     |
|                     | Nic96•CNT (Nic96•Nup57•Nup49•Nsp1)                                     | 160                     | 187                    |                     |
|                     | IRC•Nup53 (Nup192•Nic96•Nup145N•Nup53•CNT)                             | 380                     | 465                    | conc. dependent     |
| fig. S3B            | IRC•Nup53 (Nup192•Nic96•Nup145N•Nup53•CNT)                             | 335                     | 423                    |                     |
|                     | Nup188                                                                 | 180                     | 204                    |                     |
|                     | IRC•Nup53 + Nup188                                                     | 341 / 220               | 627                    | no interaction      |
| Fig. 1D<br>fig. S4A | CNC-hexamer•Nup145N<br>(Nup120•Nup37•ELYS•Nup85•Sec13•Nup145C•Nup145N) | 482                     | 507                    |                     |
|                     | Nup192•Nic96•Nup53•CNT                                                 | 335                     | 423                    |                     |
|                     | CNC-hexamer•IRC•Nup53                                                  | 654                     | 930                    | conc. dependent     |
| Fig. 1E<br>fig. S4B | CNC-hexamer (Nup120•Nup37•ELYS•Nup85•Sec13•Nup145C)                    | 438                     | 465                    |                     |
|                     | Nup192•Nic96•Nup53•CNT                                                 | 335                     | 423                    |                     |
|                     | CNC-hexamer + IRC•Nup53                                                | 430                     | 888                    | no interaction      |
| Fig. 1F<br>fig. S4C | CNC-hexamer•Nup145N                                                    | 466                     | 507                    |                     |
|                     | Nup188•Nic96•Nup53•CNT                                                 | 523                     | 431                    |                     |
|                     | CNC-hexamer•Nup188•Nic96•Nup145N•Nup53•CNT                             | 1220                    | 938                    | superstoichiometric |
| Fig. 1G<br>fig. S4D | CNC-hexamer                                                            | 428                     | 465                    |                     |
|                     | Nup188•Nic96•Nup53•CNT                                                 | 523                     | 431                    |                     |
|                     | CNC-hexamer + Nup188•Nic96•Nup53•CNT                                   | 507                     | 896                    | no interaction      |
| fig. S5A            | CNC-hexamer                                                            | 428                     | 465                    |                     |
|                     | Nup145N                                                                | 40                      | 42                     |                     |
|                     | CNC-hexamer•Nup145N                                                    | 508                     | 507                    | stoichiometric      |
| fig. S5B            | CNC-hexamer                                                            | 428                     | 465                    |                     |
|                     | Nup145N APD                                                            | 17                      | 15                     |                     |
|                     | CNC-hexamer•Nup145N APD                                                | 447                     | 480                    | stoichiometric      |
| fig. S5C            | CNC-hexamer                                                            | 428                     | 465                    |                     |
|                     | Nup145N PreS                                                           | 36 / 15                 | 27 / 15                |                     |
|                     | CNC-hexamer•Nup145N APD + Nup145N MID                                  | 690                     | 480                    | superstoichiometric |
| fig. S6A            | CNC-hexamer                                                            | 428                     | 465                    |                     |
|                     | Nup82 NTD•Nup159 T•Nup145N                                             | 112                     | 122                    |                     |
|                     | CNC-hexamer•Nup145N + Nup82 NTD•Nup159 T                               | 579                     | 587                    | stoichiometric      |
| fig. S6B            | Nup188•Nic96•Nup53•CNT                                                 | 523                     | 431                    |                     |
|                     | Nup82 NTD•Nup159 T•Nup145N                                             | 126                     | 122                    |                     |
|                     | Nup188•Nic96•Nup145N•Nup53•CNT + Nup82 NTD•Nup159 T                    | 670                     | 553                    | superstoichiometric |
| Fig. 2A<br>fig. S7A | Nup192                                                                 | 176                     | 196                    |                     |
|                     | Nup188                                                                 | 180                     | 204                    |                     |
|                     | Nup170                                                                 | 132                     | 147                    |                     |
|                     | Nic96 SOL                                                              | 73                      | 81                     |                     |
|                     | Nup192 + Nup188 + Nup170 + Nic96 SOL                                   | 174                     | 628                    | no interaction      |
| Fig. 2B<br>fig. S7B | Nup192 + Nup170 + Nic96 SOL                                            | 161 / 93                | 172 <sup>a</sup> / 81  |                     |
|                     | Nup53 + Nup145N                                                        | 52                      | 41 <sup>a</sup>        |                     |
|                     | Nup192•Nup170•Nic96 SOL•Nup53•Nup145N                                  | 528                     | 506                    | stoichiometric      |
| Fig. 2C<br>fig. S7C | Nup188 + Nup170 + Nic96 SOL                                            | 165 / 87                | 176 <sup>a</sup> / 81  |                     |
|                     | Nup53 + Nup145N                                                        | 52                      | 41 <sup>a</sup>        |                     |
|                     | Nup188 + Nup170 + Nic96 SOL + Nup53 + Nup145N                          | 242                     | 512                    | weak interaction    |
| Fig. 2D<br>fig. S8A | Nic96 SOL                                                              | 72                      | 81                     |                     |
|                     | Nup53                                                                  | 40                      | 40                     |                     |
|                     | Nic96 SOL•Nup53                                                        | 146                     | 121                    | superstoichiometric |
| Fig. 2D<br>fig. S8B | Nup170                                                                 | 145                     | 147                    |                     |
|                     | Nup53                                                                  | 35                      | 40                     |                     |
|                     | Nup170•Nup53                                                           | 197                     | 187                    | stoichiometric      |
| Fig. 2D<br>fig. S8C | Nup188                                                                 | 188                     | 204                    |                     |
|                     | Nup53                                                                  | 40                      | 40                     |                     |
|                     | Nup188 + Nup53                                                         | 188                     | 244                    | weak interaction    |
| Fig. 2D<br>fig. S8D | Nup192                                                                 | 178                     | 196                    |                     |
|                     | Nup53                                                                  | 40                      | 40                     |                     |
|                     | Nup192•Nup53                                                           | 223                     | 236                    | stoichiometric      |
| Fig. 2D<br>fig. S8E | CNT (Nup57, Nup49, Nsp1)                                               | 70                      | 77                     |                     |
|                     | Nup53                                                                  | 38                      | 40                     |                     |
|                     | CNT + Nup53                                                            | 73                      | 117                    | weak interaction    |
| Fig. 2E<br>fig. S9A | Nup170                                                                 | 145                     | 147                    |                     |
|                     | Nup145N                                                                | 42                      | 42                     |                     |
|                     | Nup170•Nup145N                                                         | 196                     | 189                    | stoichiometric      |
| Fig. 2E<br>fig. S9B | Nup188                                                                 | 189                     | 204                    |                     |
|                     | Nup145N                                                                | 40                      | 42                     |                     |
|                     | Nup188•Nup145N                                                         | 216                     | 246                    | stoichiometric      |
| Fig. 2E<br>fig. S9C | Nup192                                                                 | 178                     | 196                    |                     |
|                     | Nup145N                                                                | 40                      | 42                     |                     |
|                     | Nup192•Nup145N                                                         | 265                     | 238                    | superstoichiometric |

| Figure               | Nucleoporin or nucleoporin complex  | Experimental mass (kDa) | Theoretical mass (kDa) | Stoichiometry    |
|----------------------|-------------------------------------|-------------------------|------------------------|------------------|
| Fig. 2D<br>fig. S10A | Nup170•Nup53                        | 154                     | 187                    |                  |
|                      | Nic96 SOL                           | 70                      | 81                     |                  |
|                      | Nup170•Nup53•Nic96 SOL              | 208                     | 268                    | stoichiometric   |
| Fig. 2D<br>fig. S10B | Nup170•Nup53                        | 154                     | 187                    |                  |
|                      | Nup188                              | 194                     | 204                    |                  |
|                      | Nup170•Nup53 + Nup188               | 188                     | 391                    | no interaction   |
| Fig. 2D<br>fig. S10C | Nup170•Nup53                        | 154                     | 187                    |                  |
|                      | Nup192                              | 196                     | 196                    |                  |
|                      | Nup170•Nup53•Nup192                 | 259                     | 383                    | conc. dependent  |
| Fig. 2D<br>fig. S10D | Nup192•Nup53                        | 215                     | 236                    |                  |
|                      | Nic96 SOL                           | 70                      | 81                     |                  |
|                      | Nup192•Nup53•Nic96 SOL              | 252                     | 317                    | conc. dependent  |
| fig. S10E            | Nup170•Nup53•Nup192                 | 255                     | 383                    |                  |
|                      | Nic96 SOL                           | 70                      | 81                     |                  |
|                      | Nup170•Nup53•Nup192•Nic96 SOL       | 286                     | 464                    | conc. dependent  |
| Fig. 2E<br>fig. S11A | Nup170•Nup145N                      | 178                     | 189                    |                  |
|                      | Nup188                              | 184                     | 204                    |                  |
|                      | Nup170•Nup145N + Nup188•Nup145N     | 227                     | 393                    | partial exchange |
| Fig. 2E<br>fig. S11B | Nup170•Nup145N                      | 178                     | 189                    |                  |
|                      | Nup192                              | 178                     | 196                    |                  |
|                      | Nup170•Nup145N•Nup192               | 305                     | 385                    | conc. dependent  |
| Fig. 2E<br>fig. S11C | Nup188•Nup145N                      | 203                     | 246                    |                  |
|                      | Nup170                              | 137                     | 147                    |                  |
|                      | Nup188•Nup145N + Nup170•Nup145N     | 193                     | 393                    | partial exchange |
| Fig. 2E<br>fig. S11D | Nup192•Nup145N                      | 227                     | 238                    |                  |
|                      | Nup170                              | 137                     | 147                    |                  |
|                      | Nup192•Nup145N•Nup170               | 276                     | 385                    | conc. dependent  |
| Fig. 2E<br>fig. S11E | Nup192•Nup145N                      | 233                     | 238                    |                  |
|                      | Nup188                              | 190                     | 204                    |                  |
|                      | Nup192•Nup145N + Nup188•Nup145N     | 223                     | 442                    | partial exchange |
| Fig. 2E<br>fig. S11F | Nup188•Nup145N                      | 215                     | 246                    |                  |
|                      | Nup192                              | 180                     | 196                    |                  |
|                      | Nup188•Nup145N + Nup192•Nup145N     | 224                     | 442                    | partial exchange |
| Fig. 2E<br>fig. S11G | Avi-Nup192                          | 178                     | 194                    |                  |
|                      | Nup188                              | 178                     | 204                    |                  |
|                      | Nup145N                             | 52                      | 42                     |                  |
|                      | Avi-Nup192•Nup145N + Nup188•Nup145N | 223                     | 440                    | partial exchange |
| fig. S12A            | Nup170•Nup145N                      | 178                     | 189                    |                  |
|                      | Nup53                               | 38                      | 40                     |                  |
|                      | Nup170•Nup145N•Nup53                | *inconclusive           | 229                    | stoichiometric   |
| fig. S12B            | Nup192                              | 179                     | 196                    |                  |
|                      | Nup53                               | 38                      | 40                     |                  |
|                      | Nup145N                             | 40                      | 42                     |                  |
|                      | Nup192•Nup53•Nup145N                | 280                     | 278                    | stoichiometric   |
| fig. S12C            | Nup170•Nup53•Nup145N                | 183                     | 229                    |                  |
|                      | Nup192                              | 176                     | 196                    |                  |
|                      | Nup170•Nup53•Nup145N•Nup192         | 416                     | 425                    | stoichiometric   |
| Fig. 2F<br>fig. S13A | Nup192                              | 183                     | 196                    |                  |
|                      | SUMO-Nup53 31-67                    | 16                      | 14                     |                  |
|                      | Nup192•SUMO-Nup53 31-67             | 197                     | 210                    | stoichiometric   |
| Fig. 2F<br>fig. S14A | Nic96 SOL                           | 70                      | 81                     |                  |
|                      | SUMO-Nup53 1-90                     | 21                      | 21                     |                  |
|                      | Nic96 SOL•SUMO-Nup53 1-90           | 88                      | 102                    | stoichiometric   |
| Fig. 2F<br>fig. S14B | Nic96 SOL                           | 81                      | 81                     |                  |
|                      | SUMO-Nup53 69-90                    | 16                      | 14                     |                  |
|                      | Nic96 SOL•SUMO-Nup53 69-90          | 88                      | 95                     | stoichiometric   |
| Fig. 2F<br>fig. S14C | Nup192                              | 176                     | 196                    |                  |
|                      | Nic96 SOL•SUMO-Nup53 1-90           | 81                      | 102                    |                  |
|                      | Nup192•Nic96 SOL•SUMO-Nup53 1-90    | 220                     | 298                    | conc. dependent  |
| Fig. 2F<br>fig. S17A | Nup192                              | 178                     | 196                    |                  |
|                      | SUMO-Nup145N 606-683                | 20                      | 19                     |                  |
|                      | Nup192•SUMO-Nup145N 606-683         | 189                     | 215                    | stoichiometric   |
| Fig. 2F<br>fig. S17B | Nup192                              | 176                     | 196                    |                  |
|                      | Nup145N PreS                        | 28 / 14                 | 27 / 15                |                  |
|                      | Nup192•Nup145N MID + Nup145N APD    | 223                     | 223                    | stoichiometric   |
| Fig. 2F<br>fig. S17C | Nup192 NTD                          | 100                     | 109                    |                  |
|                      | Nup145N                             | 53                      | 42                     |                  |
|                      | Nup192 NTD•Nup145N                  | 151                     | 151                    | stoichiometric   |
| Fig. 2F<br>fig. S17D | Nup192 CTD                          | 127                     | 91                     |                  |
|                      | Nup145N                             | 40                      | 42                     |                  |
|                      | Nup192 CTD + Nup145N                | 137                     | 133                    | stoichiometric   |
| Fig. 2F<br>fig. S17E | Nup192 TAIL                         | 38                      | 41                     |                  |
|                      | Nup145N                             | 46                      | 42                     |                  |
|                      | Nup192 TAIL + Nup145N               | 45 / 40                 | 83                     | stoichiometric   |

| Figure               | Nucleoporin or nucleoporin complex   | Experimental mass (kDa) | Theoretical mass (kDa) | Stoichiometry    |
|----------------------|--------------------------------------|-------------------------|------------------------|------------------|
| fig. S18A            | Nup170                               | 125                     | 147                    |                  |
|                      | SUMO-Nup53 31-67                     | 16                      | 14                     |                  |
|                      | Nup170 + SUMO-Nup53 31-67            | 129                     | 161                    | no interaction   |
| fig. S18B            | Nup170                               | 125                     | 147                    |                  |
|                      | SUMO-Nup53 69-90                     | 14                      | 14                     |                  |
|                      | Nup170 + SUMO-Nup53 69-90            | 129                     | 161                    | no interaction   |
| fig. S18C            | Nup170                               | 125                     | 147                    |                  |
|                      | SUMO-Nup145N 606-683                 | 15                      | 19                     |                  |
|                      | Nup170+ SUMO-Nup145N 606-683         | 133                     | 166                    | no interaction   |
| fig. S18D            | Nup192                               | 176                     | 196                    |                  |
|                      | SUMO-Nup53 69-90                     | 14                      | 14                     |                  |
|                      | Nup192 + SUMO-Nup53 69-90            | 174                     | 210                    | no interaction   |
| fig. S18E            | Nup192                               | 176                     | 196                    |                  |
|                      | GST-Nup53 329-361                    | 55                      | 61                     |                  |
|                      | Nup192 + GST-Nup53 329-361           | 172                     | 257                    | no interaction   |
| fig. S18F            | Nup192                               | 176                     | 196                    |                  |
|                      | GST-Nup145N 729-750                  | 55                      | 59                     |                  |
|                      | Nup192 + GST-Nup145N 729-750         | 172                     | 255                    | no interaction   |
| fig. S18G            | Nic96 SOL                            | 70                      | 81                     |                  |
|                      | SUMO-Nup53 31-67                     | 16                      | 14                     |                  |
|                      | Nic96 + SUMO-Nup53 31-67             | 74                      | 95                     | no interaction   |
| fig. S18H            | Nic96 SOL                            | 70                      | 81                     |                  |
|                      | GST-Nup53 329-361                    | 55                      | 61                     |                  |
|                      | Nic96 + GST-Nup53 329-361            | 66                      | 142                    | no interaction   |
| Fig. 2F<br>fig. S19B | Nup188                               | 181                     | 204                    |                  |
|                      | Nup145N PreS                         | 28 / 14                 | 27 / 15                |                  |
|                      | Nup188•Nup145N MID + Nup145N APD     | 213                     | 231                    | stoichiometric   |
| Fig. 2F<br>fig. S19C | Nup188                               | 178                     | 204                    |                  |
|                      | SUMO-Nup145N 606-750                 | 37                      | 27                     |                  |
|                      | Nup188•SUMO-Nup145N 606-750          | 202                     | 231                    | stoichiometric   |
| Fig. 2F<br>fig. S19D | Nup188                               | 179                     | 204                    |                  |
|                      | SUMO-Nup145N 606-683                 | 21                      | 19                     |                  |
|                      | Nup188 + SUMO-Nup145N 606-683        | 173                     | 223                    | no interaction   |
| Fig. 2F<br>fig. S19E | Nup188                               | 178                     | 204                    |                  |
|                      | GST-Nup145N 729-750                  | 55                      | 59                     |                  |
|                      | Nup188 + GST-Nup145N 729-750         | 188                     | 263                    | weak interaction |
| fig. S39A            | Nic96 SOL                            | 72                      | 81                     |                  |
|                      | Nup53 RRM                            | 13                      | 13                     |                  |
|                      | Nic96 SOL + Nup53 RRM                | 73                      | 94                     | no interaction   |
| fig. S39B            | Nup170                               | 133                     | 147                    |                  |
|                      | Nup53 RRM                            | 12                      | 13                     |                  |
|                      | Nup170 + Nup53 RRM                   | 132                     | 160                    | no interaction   |
| fig. S39C            | Nup192                               | 183                     | 196                    |                  |
|                      | Nup53 RRM                            | 14                      | 13                     |                  |
|                      | Nup192 + Nup53 RRM                   | 182                     | 209                    | no interaction   |
| fig. S39D            | Nup188                               | 183                     | 204                    |                  |
|                      | Nup53 RRM                            | 14                      | 13                     |                  |
|                      | Nup188 + Nup53 RRM                   | 182                     | 209                    | no interaction   |
| fig. S44B            | Nup120•Nup37•ELYS                    | 209                     | 239                    |                  |
|                      | Nup84•Nup133                         | 241                     | 258                    |                  |
|                      | Nup120•Nup37•ELYS•Nup84•Nup133       | 264                     | 497                    | weak interaction |
| fig. S44C            | Nup120•Nup37•ELYS                    | 209                     | 239                    |                  |
|                      | Nup84•Nup133 ΔNTE                    | 233                     | 246                    |                  |
|                      | Nup120•Nup37•ELYS +Nup84•Nup133 ΔNTE | 240                     | 485                    | no interaction   |



**Table S4.**

## Crystallization and cryoprotection conditions

| Protein(s)                                   | Concentration                                                               | Crystallization condition                                                                          | Cryo protection condition                                                                                                                                                        |
|----------------------------------------------|-----------------------------------------------------------------------------|----------------------------------------------------------------------------------------------------|----------------------------------------------------------------------------------------------------------------------------------------------------------------------------------|
| Nup170 <sup>NTD</sup> •Nup53 <sup>R3</sup>   | 20 mg/ml Nup170 <sup>NTD</sup><br>3-fold molar excess Nup53 <sup>R3</sup>   | 1.0 M Na/K phosphate (pH 6.9)                                                                      | Mother liquor gradually supplemented to 25 % (v/v) ethylene glycol in 5 % steps                                                                                                  |
| Nup170 <sup>CTD</sup> •Nup145N <sup>R3</sup> | 20 mg/ml Nup170 <sup>CTD</sup><br>3-fold molar excess Nup145N <sup>R3</sup> | 12 % (w/v) PEG 3,350<br>0.2 M lithium acetate                                                      | Mother liquor gradually supplemented to 25 % (v/v) ethylene glycol in 5 % steps                                                                                                  |
| Nup170 <sup>CTD</sup> SeMet                  | 15 mg/ml                                                                    | 0.1 M MES (pH 6.3)<br>10 % PEG 20,000<br>10 % (v/v) ethylene glycol<br>0.2 M potassium thiocyanate | Mother liquor gradually supplemented to 25 % (v/v) ethylene glycol in 5 % steps                                                                                                  |
| Nup170 <sup>CTD</sup>                        | 30 mg/ml                                                                    | 0.1 M HEPES (pH 7.0)<br>1.0 M sodium acetate                                                       | Mother liquor gradually supplemented to 25 % (v/v) ethylene glycol in 5 % steps                                                                                                  |
| Nup170 <sup>SOL</sup>                        | 7 mg/ml                                                                     | 0.1 M HEPES (pH 7.1)<br>0.5 M ammonium sulfate                                                     | Mother liquor gradually supplemented to 25 % (v/v) ethylene glycol in 5 % steps                                                                                                  |
| Nic96 <sup>SOL</sup> •Nup53 <sup>R2</sup>    | 12 mg/ml                                                                    | 0.1 M TRIS (pH 7.0)<br>12 % (w/v) PEG 6,000<br>1.2 M sodium chloride                               | Paratone N                                                                                                                                                                       |
| Nic96 <sup>SOL</sup>                         | 12 mg/ml                                                                    | 4 % Tacsimate (pH 7.4)<br>14 % (w/v) PEG 3,350                                                     | Paratone N                                                                                                                                                                       |
| Nup192 <sup>HEAD</sup>                       | 7 mg/ml                                                                     | 0.1 M TRIS (pH 7.9)<br>6 % (w/v) PEG 4,000<br>5 % (v/v) polypropylene glycol                       | Stabilized in<br>0.1 M TRIS (pH 7.9)<br>7 % (w/v) PEG 4,000<br>6 % (v/v) polypropylene glycol<br>Solution gradually supplemented to 25 % (v/v) polypropylene glycol in 5 % steps |
| Nup53 <sup>RRM</sup>                         | 15 mg/ml                                                                    | 0.1 M HEPES (pH 7.0)<br>24 % (w/v) PEG 3,350<br>0.2 M potassium iodide                             | Mother liquor supplemented to 25 % ethylene glycol                                                                                                                               |
| Nup53 <sup>RRM</sup>                         | 15 mg/ml                                                                    | 4 % Tacsimate (pH 4.1)<br>15 % (w/v) PEG 3,350                                                     | 32 % Tacsimate (pH 4.1)<br>19 % (w/v) PEG 3,350                                                                                                                                  |
| Nup145N <sup>APD</sup>                       | 10 mg/ml                                                                    | 0.1 M citric acid (pH 3.0)<br>25 % (w/v) PEG 3,350                                                 | Mother liquor supplemented to 25 % ethylene glycol                                                                                                                               |
| Nup145N <sup>APD</sup> •Nup145C <sup>N</sup> | 10 mg/ml                                                                    | 0.1 M TRIS (pH 8.8)<br>32 % (w/v) PEG 4,000<br>0.2 M lithium sulfate                               | Mother liquor supplemented to 10 % glycerol                                                                                                                                      |

**Table S5.**X-ray crystallography analysis of Nup170<sup>NTD</sup>•Nup53<sup>R3</sup> and Nup170<sup>SOL</sup>

| <b>Data collection</b>                                  |                                               |                                               |                                  |                                     |                                  |
|---------------------------------------------------------|-----------------------------------------------|-----------------------------------------------|----------------------------------|-------------------------------------|----------------------------------|
| Protein                                                 | Nup170 <sup>NTD</sup> •Nup53 <sup>R3</sup>    | Nup170 <sup>NTD</sup> •Nup53 <sup>R3</sup>    | Nup170 <sup>SOL</sup>            | Nup170 <sup>SOL g</sup>             | Nup170 <sup>SOL g</sup>          |
| PDB ID                                                  |                                               | 5HAX                                          |                                  | 5HB1                                |                                  |
| Synchrotron                                             | APS <sup>a</sup>                              | APS                                           | SSRL <sup>b</sup>                | SSRL                                | SSRL                             |
| Beamline                                                | 23-ID-D                                       | 23-ID-D                                       | BL12-2                           | BL12-2                              | BL12-2                           |
| Space group                                             | P2 <sub>1</sub> 2 <sub>1</sub> 2 <sub>1</sub> | P2 <sub>1</sub> 2 <sub>1</sub> 2 <sub>1</sub> | P2 <sub>1</sub> 2 <sub>1</sub> 2 | P2 <sub>1</sub> 2 <sub>1</sub> 2    | P2 <sub>1</sub> 2 <sub>1</sub> 2 |
| Cell dimensions                                         |                                               |                                               |                                  |                                     |                                  |
| <i>a</i> , <i>b</i> , <i>c</i> (Å)                      | 68.7, 104.0, 119.0                            | 69.2, 106.2, 120.1                            | 93.2, 136.9, 89.0                | 96.0, 138.5, 89.2                   | 96.0, 138.5, 89.2                |
| $\alpha$ , $\beta$ , $\gamma$ (°)                       | 90.0, 90.0, 90.0                              | 90.0, 90.0, 90.0                              | 90.0, 90.0, 90.0                 | 90.0, 90.0, 90.0                    | 90.0, 90.0, 90.0                 |
|                                                         | <i>Se Peak</i>                                |                                               | <i>Se Peak</i>                   |                                     |                                  |
| Wavelength                                              | 0.9792                                        | 1.0332                                        | 0.9791                           | 1.0330                              |                                  |
| Resolution (Å)                                          | 50.0 – 2.5                                    | 50.0 – 2.1                                    | 50.0 – 4.5                       | 40.0 – 4.0                          | 40.0 – 4.3                       |
| <i>R</i> <sub>meas</sub> (%) <sup>c</sup>               | 8.5 (127.7)                                   | 8.0 (188.5)                                   | 13.1 (290.0)                     | 5.7 (353.7)                         | 5.1 (121.5)                      |
| <i>R</i> <sub>pim</sub> (%) <sup>c</sup>                | 1.7 (24.9)                                    | 2.2 (51.1)                                    | 3.7 (85.0)                       | 1.7 (98.5)                          | 1.5 (33.0)                       |
| <i>CC</i> <sub>1/2</sub> <sup>c</sup>                   | 100.0 (86.6)                                  | 100.0 (68.1)                                  | 99.9 (56.0)                      | 100.0 (55.5)                        | 100.0 (92.2)                     |
| <i>&lt; I / <math>\sigma</math> I &gt;</i> <sup>c</sup> | 30.4 (2.4)                                    | 20.3 (1.8)                                    | 11.6 (1.0)                       | 18.5 (0.8)                          | 22.8 (2.5)                       |
| Completeness (%) <sup>c</sup>                           | 98.9 (90.7)                                   | 100.0 (100.0)                                 | 99.3 (94.1)                      | 99.7 (98.5)                         | 99.8 (99.9)                      |
| No. of observations                                     | 776,896                                       | 676,933                                       | 91,230                           | 135,558                             | 108,324                          |
| No. of unique reflections <sup>c,d</sup>                | 30,229 (2,703)                                | 52,358 (5,120)                                | 7,200 (649)                      | 10,614 (1,027)                      | 8,524 (845)                      |
| Redundancy <sup>c</sup>                                 | 25.7 (25.2)                                   | 12.9 (13.5)                                   | 12.7 (11.1)                      | 12.8 (12.4)                         | 12.7 (13.4)                      |
| <b>Refinement</b>                                       |                                               |                                               |                                  |                                     |                                  |
| Resolution (Å)                                          |                                               | 50.0 – 2.1                                    |                                  | 40.0 – 4.0                          |                                  |
| No. of reflections                                      |                                               | 52,342                                        |                                  | 7,867 <sup>e</sup>                  |                                  |
| No. of reflections test set                             |                                               | 2,618 (5.0%)                                  |                                  | 789 (10.0%)                         |                                  |
| <i>R</i> <sub>work</sub> / <i>R</i> <sub>free</sub>     |                                               | 19.9 / 23.0                                   |                                  | 30.4 / 35.2                         |                                  |
| No. atoms                                               |                                               | 5,998                                         |                                  | 5,895                               |                                  |
| Protein                                                 |                                               | 5,581                                         |                                  | 5,895                               |                                  |
| Water                                                   |                                               | 387                                           |                                  | 0                                   |                                  |
| Ligand/Ions                                             |                                               | 30                                            |                                  | 0                                   |                                  |
| <i>B</i> -factors                                       |                                               | 62                                            |                                  | 222                                 |                                  |
| Protein                                                 |                                               | 63                                            |                                  | 222                                 |                                  |
| Water                                                   |                                               | 57                                            |                                  | -                                   |                                  |
| Ligand/Ions                                             |                                               | 79                                            |                                  | -                                   |                                  |
| RMSD                                                    |                                               |                                               |                                  |                                     |                                  |
| Bond lengths (Å)                                        |                                               | 0.002                                         |                                  | 0.003                               |                                  |
| Bond angles (°)                                         |                                               | 0.5                                           |                                  | 0.5                                 |                                  |
| <b>Ramachandran plot<sup>f</sup></b>                    |                                               |                                               |                                  |                                     |                                  |
| Favored (%)                                             |                                               | 97.6                                          |                                  | 96.8                                |                                  |
| Additionally allowed (%)                                |                                               | 2.4                                           |                                  | 3.2                                 |                                  |
| Outliers (%)                                            |                                               | 0.0                                           |                                  | 0.0                                 |                                  |
| <b>MolProbity</b>                                       |                                               |                                               |                                  |                                     |                                  |
| Clashscore <sup>f</sup>                                 |                                               | 0.18 (100 <sup>th</sup> percentile)           |                                  | 1.95 (100 <sup>th</sup> percentile) |                                  |
| Molprobability score <sup>f</sup>                       |                                               | 0.79 (100 <sup>th</sup> percentile)           |                                  | 1.46 (100 <sup>th</sup> percentile) |                                  |

<sup>a</sup>APS, Advanced Photon Source<sup>b</sup>SSRL, Stanford Synchrotron Radiation Lightsource<sup>c</sup>Highest-resolution shell is shown in parentheses<sup>d</sup>Friedel pairs were merged<sup>e</sup>Refinement was performed with ellipsoidally truncated data<sup>f</sup>As determined by MolProbity<sup>g</sup>As a reference, two different high-resolution cutoffs are shown

**Table S6.**X-ray crystallography analysis of *apo* Nup170<sup>CTD</sup> and Nup170<sup>CTD</sup>•Nup145N<sup>R3</sup>

| <b>Data collection</b>                              | Nup170 <sup>CTD</sup>                               | Nup170 <sup>CTD</sup>                         | Nup170 <sup>CTD</sup> •Nup145N <sup>R3</sup> |
|-----------------------------------------------------|-----------------------------------------------------|-----------------------------------------------|----------------------------------------------|
| Protein                                             | Nup170 <sup>CTD</sup><br>Y905M/L1007M/L1183M/V1292M | Nup170 <sup>CTD</sup>                         | Nup170 <sup>CTD</sup> •Nup145N <sup>R3</sup> |
| PDB ID                                              | 5HAY                                                | 5HAZ                                          | 5HB0                                         |
| Synchrotron                                         | SSRL <sup>a</sup>                                   | APS <sup>b</sup>                              | APS                                          |
| Beamline                                            | BL12-2                                              | 23-ID-D                                       | 23-ID-D                                      |
| Space group                                         | P2 <sub>1</sub> 2 <sub>1</sub> 2 <sub>1</sub>       | P2 <sub>1</sub> 2 <sub>1</sub> 2 <sub>1</sub> | P1                                           |
| Cell dimensions                                     |                                                     |                                               |                                              |
| <i>a</i> , <i>b</i> , <i>c</i> (Å)                  | 61.8, 101.7, 193.8                                  | 69.2, 106.2, 120.1                            | 74.6, 111.47, 111.75                         |
| $\alpha$ , $\beta$ , $\gamma$ (°)                   | 90.0, 90.0, 90.0                                    | 90.0, 90.0, 90.0                              | 91.8, 92.5, 91.4                             |
|                                                     | <i>Se Peak</i>                                      |                                               |                                              |
| Wavelength                                          | 0.9795                                              | 1.0332                                        | 1.0332                                       |
| Resolution (Å)                                      | 50.0 – 2.8                                          | 50.0 – 2.1                                    | 50.0 – 3.5                                   |
| <i>R</i> <sub>meas</sub> (%) <sup>c</sup>           | 11.6 (99.9)                                         | 5.4 (89.5)                                    | 41.4 (179.9)                                 |
| <i>R</i> <sub>pim</sub> (%) <sup>c</sup>            | 2.8 (25.2)                                          | 2.1 (33.8)                                    | 15.6 (67.6)                                  |
| <i>CC</i> <sub>1/2</sub> <sup>c</sup>               | 99.9 (81.8)                                         | 99.9 (85.0)                                   | 98.4 (51.7)                                  |
| $\langle I / \sigma I \rangle$ <sup>c</sup>         | 22.4 (2.9)                                          | 21.0 (2.0)                                    | 6.2 (1.3)                                    |
| Completeness (%) <sup>c</sup>                       | 98.2 (82.2)                                         | 97.8 (93.9)                                   | 98.8 (94.9)                                  |
| No. of observations                                 | 500,568                                             | 325,202                                       | 317,882                                      |
| No. of unique reflections <sup>c</sup>              | 30,966 (2,527)                                      | 47,908 (4,589)                                | 45,493 (4,380)                               |
| Redundancy <sup>c</sup>                             | 16.2 (14.2)                                         | 6.8 (6.8)                                     | 7.0 (6.9)                                    |
| <b>Refinement</b>                                   |                                                     |                                               |                                              |
| Resolution (Å)                                      | 50.0 – 2.8                                          | 50.0 – 2.1                                    | 50.0 – 3.5                                   |
| No. of reflections                                  | 30,817                                              | 47,882                                        | 45,466                                       |
| No. of reflections test set                         | 1,544 (5.0%)                                        | 2,395 (5.0%)                                  | 2,011 (4.4%)                                 |
| <i>R</i> <sub>work</sub> / <i>R</i> <sub>free</sub> | 20.9 / 25.1                                         | 20.6 / 23.1                                   | 21.0 / 26.0                                  |
| No. atoms (non-hydrogen)                            | 8,613                                               | 4,919                                         | 16,998                                       |
| Protein                                             | 8,564                                               | 4,517                                         | 16,998                                       |
| Water                                               | 48                                                  | 378                                           | 0                                            |
| Ligand/Ions                                         | 1                                                   | 24                                            | 0                                            |
| B-factors                                           | 65                                                  | 69                                            | 89                                           |
| Protein                                             | 65                                                  | 69                                            | 89                                           |
| Water                                               | 57                                                  | 64                                            | -                                            |
| Ligand/Ions                                         | 62                                                  | 117                                           | -                                            |
| RMSD                                                |                                                     |                                               |                                              |
| Bond lengths (Å)                                    | 0.003                                               | 0.004                                         | 0.005                                        |
| Bond angles (°)                                     | 0.6                                                 | 0.6                                           | 0.6                                          |
| <b>Ramachandran plot<sup>e</sup></b>                |                                                     |                                               |                                              |
| Favored (%)                                         | 97.2                                                | 97.5                                          | 95.1                                         |
| Additionally allowed (%)                            | 2.8                                                 | 2.5                                           | 4.9                                          |
| Outliers (%)                                        | 0.0                                                 | 0.0                                           | 0.0                                          |
| <b>MolProbity</b>                                   |                                                     |                                               |                                              |
| Clashscore <sup>e</sup>                             | 1.35 (100 <sup>th</sup> percentile)                 | 1.44 (100 <sup>th</sup> percentile)           | 1.98 (100 <sup>th</sup> percentile)          |
| Molprobability score <sup>e</sup>                   | 1.29 (100 <sup>th</sup> percentile)                 | 1.27 (100 <sup>th</sup> percentile)           | 1.55 (100 <sup>th</sup> percentile)          |

<sup>a</sup>SSRL, Stanford Synchrotron Radiation Lightsource<sup>e</sup>As determined by MolProbity<sup>b</sup>APS, Advanced Photon Source<sup>c</sup>Highest-resolution shell is shown in parentheses<sup>d</sup>Friedel pairs were merged

**Table S7.**X-ray crystallography analysis of *apo* Nic96<sup>SOL</sup>, Nup96<sup>SOL</sup>•Nup53<sup>R2</sup> and Nup192<sup>ΔHEAD</sup>

| <b>Data collection</b>                   |                                     |                                           |                                      |                                      |
|------------------------------------------|-------------------------------------|-------------------------------------------|--------------------------------------|--------------------------------------|
| Protein                                  | Nic96 <sup>SOL</sup>                | Nup96 <sup>SOL</sup> •Nup53 <sup>R2</sup> | Nup192 <sup>ΔHEAD</sup> <sup>f</sup> | Nup192 <sup>ΔHEAD</sup> <sup>f</sup> |
| PDB ID                                   | 5HB2                                | 5HB3                                      | 5HB4                                 |                                      |
| Synchrotron                              | APS <sup>a</sup>                    | SSRL <sup>b</sup>                         | SSRL                                 | SSRL                                 |
| Beamline                                 | 23-ID-B                             | BL12-2                                    | BL12-2                               | BL12-2                               |
| Space group                              | P2 <sub>1</sub>                     | P1                                        | C2                                   | C2                                   |
| Cell dimensions                          |                                     |                                           |                                      |                                      |
| a, b, c (Å)                              | 53.0, 72.9, 122.7                   | 59.5, 87.0, 98.1                          | 190.7, 53.5, 171.8                   | 190.7, 53.5, 171.8                   |
| α, β, γ (°)                              | 90.0, 93.6, 90.0                    | 100.7, 99.6, 95.7                         | 90.0, 108.3, 90.0                    | 90.0, 108.3, 90.0                    |
|                                          | <i>Se Peak</i>                      |                                           | <i>Os Peak</i>                       | <i>Os Peak</i>                       |
| Wavelength                               | 0.9792                              | 1.0000                                    | 1.1250                               | 1.1250                               |
| Resolution (Å)                           | 50.0 – 3.3                          | 50.0 – 2.65                               | 50.0 – 3.2                           | 50.0 – 3.5                           |
| R <sub>meas</sub> (%) <sup>c</sup>       | 13.7 (104.2)                        | 7.7 (83.7)                                | 20.8 (325.0)                         | 16.5 (151.7)                         |
| R <sub>pim</sub> (%) <sup>c</sup>        | 5.0 (38.7)                          | 3.9 (49.4)                                | 5.7 (92.5)                           | 4.5 (40.9)                           |
| CC <sub>1/2</sub> <sup>c</sup>           | 99.8 (85.1)                         | 99.9 (81.5)                               | 99.9 (37.5)                          | 99.9 (74.7)                          |
| < I / σI > <sup>c</sup>                  | 12.0 (2.5)                          | 15.1 (2.1)                                | 12.1 (0.8)                           | 15.5 (2.1)                           |
| Completeness (%) <sup>c</sup>            | 100.0 (99.8)                        | 88.6 (82.4)                               | 98.6 (92.0)                          | 99.4 (99.1)                          |
| No. of observations                      | 107,569                             | 189,415                                   | 367,182                              | 280,883                              |
| No. of unique reflections <sup>c,d</sup> | 14,334 (1,400)                      | 48,566 (4,513)                            | 27,800 (2,557)                       | 21,186 (2,077)                       |
| Redundancy <sup>c</sup>                  | 7.5 (7.0)                           | 3.9 (3.8)                                 | 13.2 (11.8)                          | 13.3 (13.7)                          |
| <b>Refinement</b>                        |                                     |                                           |                                      |                                      |
| Resolution (Å)                           | 50.0 – 3.3                          | 50.0 – 2.65                               | 50.0 – 3.2                           |                                      |
| No. of reflections                       | 14,284                              | 48,536                                    | 27,512                               |                                      |
| No. of reflections test set              | 1,410 (9.9%)                        | 2,368 (4.9%)                              | 1,377 (5.0%)                         |                                      |
| R <sub>work</sub> / R <sub>free</sub>    | 23.1 / 27.8                         | 21.1 / 24.9                               | 23.3 / 26.5                          |                                      |
| No. atoms (non-hydrogen)                 |                                     |                                           |                                      |                                      |
| Protein                                  | 5,674                               | 11,569                                    | 11,035                               |                                      |
| Water                                    | -                                   | 71                                        | 0                                    |                                      |
| Ligand/Ions                              | -                                   | 3                                         | 5                                    |                                      |
| <i>B</i> -factors                        |                                     |                                           |                                      |                                      |
| Protein                                  | 127                                 | 64                                        | 136                                  |                                      |
| Water                                    | -                                   | 45                                        | -                                    |                                      |
| Ligand/Ions                              | -                                   | 57                                        | 167                                  |                                      |
| RMSD                                     |                                     |                                           |                                      |                                      |
| Bond lengths (Å)                         | 0.003                               | 0.004                                     | 0.002                                |                                      |
| Bond angles (°)                          | 0.6                                 | 0.9                                       | 0.5                                  |                                      |
| <b>Ramachandran plot<sup>e</sup></b>     |                                     |                                           |                                      |                                      |
| Favored (%)                              | 94.2                                | 96.0                                      | 95.2                                 |                                      |
| Additionally allowed (%)                 | 5.8                                 | 4.0                                       | 4.8                                  |                                      |
| Outliers (%)                             | 0.0                                 | 0.0                                       | 0.0                                  |                                      |
| <b>MolProbity</b>                        |                                     |                                           |                                      |                                      |
| Clashscore <sup>e</sup>                  | 3.10 (100 <sup>th</sup> percentile) | 3.71 (99 <sup>th</sup> percentile)        | 1.27 (100 <sup>th</sup> percentile)  |                                      |
| Molprobability score <sup>e</sup>        | 1.84 (100 <sup>th</sup> percentile) | 1.43 (100 <sup>th</sup> percentile)       | 1.24 (100 <sup>th</sup> percentile)  |                                      |

<sup>a</sup>APS, Advanced Photon Source<sup>b</sup>SSRL, Stanford Synchrotron Radiation Lightsource<sup>c</sup>Highest-resolution shell is shown in parentheses<sup>d</sup>Friedel pairs were merged<sup>e</sup>As determined by MolProbity<sup>f</sup>As a reference, two different high-resolution cutoffs are shown

**Table S8.**X-ray crystallography analysis of Nup145N<sup>APD</sup> and Nup145N<sup>APD</sup>•Nup145C<sup>N</sup>

| <b>Data collection</b>                   |                                     |                                              |
|------------------------------------------|-------------------------------------|----------------------------------------------|
| Protein                                  | Nup145N <sup>APD</sup>              | Nup145N <sup>APD</sup> •Nup145C <sup>N</sup> |
| PDB ID                                   | 5HB5                                | 5HB6                                         |
| Synchrotron                              | SSRL <sup>a</sup>                   | ALS <sup>b</sup>                             |
| Beamline                                 | BL12-2                              | 8.2.2                                        |
| Space group                              | P2 <sub>1</sub>                     | P1                                           |
| Cell dimensions                          |                                     |                                              |
| a, b, c (Å)                              | 46.1, 34.9, 78.2                    | 43.0, 44.1, 45.3                             |
| α, β, γ (°)                              | 90.0, 99.4, 90.0                    | 99.8, 111.0, 105.9                           |
| Wavelength                               | 0.9795                              | 1.0000                                       |
| Resolution (Å)                           | 30.0 – 1.5                          | 30.0 – 1.3                                   |
| R <sub>meas</sub> (%) <sup>c</sup>       | 9.4 (100.4)                         | 5.9 (110.5)                                  |
| R <sub>rim</sub> (%) <sup>c</sup>        | 3.6 (39.1)                          | 2.2 (56.0)                                   |
| CC <sub>1/2</sub> <sup>c</sup>           | 99.9 (87.6)                         | 99.9 (61.7)                                  |
| < I / σ I > <sup>c</sup>                 | 12.4 (2.3)                          | 17.2 (1.4)                                   |
| Completeness (%) <sup>c</sup>            | 97.2 (92.8)                         | 94.7 (88.9)                                  |
| No. of observations                      | 257,064                             | 461,854                                      |
| No. of unique reflections <sup>c,d</sup> | 38,743 (3,651)                      | 66,722 (6,234)                               |
| Redundancy <sup>c</sup>                  | 6.6 (6.3)                           | 6.9 (3.8)                                    |
| <b>Refinement</b>                        |                                     |                                              |
| Resolution (Å)                           | 30.0 – 1.5                          | 30.0 – 1.3                                   |
| No. of reflections                       | 38,683                              | 66,707                                       |
| No. of reflections test set              | 2,012 (5.2%)                        | 1,792 (2.7%)                                 |
| R <sub>work</sub> / R <sub>free</sub>    | 16.1 / 18.9                         | 15.1 / 17.4                                  |
| No. atoms (non-hydrogen)                 |                                     |                                              |
| Protein                                  | 2,331                               | 2,351                                        |
| Water                                    | 331                                 | 472                                          |
| Ligand/Ions                              | 91                                  | 25                                           |
| B-factors                                |                                     |                                              |
| Protein                                  | 21                                  | 25                                           |
| Water                                    | 32                                  | 36                                           |
| Ligand/Ions                              | 61                                  | 37                                           |
| RMSD                                     |                                     |                                              |
| Bond lengths (Å)                         | 0.005                               | 0.008                                        |
| Bond angles (°)                          | 0.8                                 | 1.0                                          |
| <b>Ramachandran plot<sup>e</sup></b>     |                                     |                                              |
| Favored (%)                              | 95.9                                | 94.6                                         |
| Additionally allowed (%)                 | 4.1                                 | 5.1                                          |
| Outliers (%)                             | 0.0                                 | 0.3                                          |
| <b>MolProbity</b>                        |                                     |                                              |
| Clashscore <sup>e</sup>                  | 0.42 (100 <sup>th</sup> percentile) | 1.47 (99 <sup>th</sup> percentile)           |
| Molprobability score <sup>e</sup>        | 0.99 (99 <sup>th</sup> percentile)  | 1.31 (91 <sup>st</sup> percentile)           |

<sup>a</sup>SSRL, Stanford Synchrotron Radiation Lightsource<sup>b</sup>ALS, Advanced Light Source<sup>c</sup>Highest-resolution shell is shown in parentheses<sup>d</sup>Friedel pairs were merged<sup>e</sup>As determined by MolProbity

**Table S9.**X-ray crystallographic analysis of Nup53<sup>RRM</sup>

| <b>Data collection</b>                              |                                               |                                               |                                               |                                     |                                |
|-----------------------------------------------------|-----------------------------------------------|-----------------------------------------------|-----------------------------------------------|-------------------------------------|--------------------------------|
| Protein                                             | Nup53 <sup>RRM e</sup>                        | Nup53 <sup>RRM e</sup>                        | Nup53 <sup>RRM</sup>                          | Nup53 <sup>RRM</sup>                | Nup53 <sup>RRM</sup>           |
| PDB ID                                              | 5HB7                                          |                                               |                                               | 5HB8                                |                                |
| Synchrotron                                         | SSRL <sup>a</sup>                             | SSRL <sup>a</sup>                             | SSRL                                          | SSRL                                | SSRL                           |
| Beamline                                            | BL12-2                                        | BL12-2                                        | BL12-2                                        | BL12-2                              | BL12-2                         |
| Space group                                         | P2 <sub>1</sub> 2 <sub>1</sub> 2 <sub>1</sub> | P2 <sub>1</sub> 2 <sub>1</sub> 2 <sub>1</sub> | P2 <sub>1</sub> 2 <sub>1</sub> 2 <sub>1</sub> | P3 <sub>1</sub> 2 <sub>1</sub>      | P3 <sub>1</sub> 2 <sub>1</sub> |
| Cell dimensions                                     |                                               |                                               |                                               |                                     |                                |
| a, b, c (Å)                                         | 35.0, 50.4, 60.0                              | 35.0, 50.4, 60.0                              | 34.9, 50.4, 60.0                              | 94.7, 94.7, 115.5                   | 93.8, 97.8, 114.1              |
| α, β, γ (°)                                         | 90.0, 90.0, 90.0                              | 90.0, 90.0, 90.0                              | 90.0, 90.0, 90.0                              | 90.0, 90.0, 120.0                   | 90.0, 90.0, 120.0              |
|                                                     |                                               |                                               | <i>Se Peak</i>                                |                                     | <i>Os Peak</i>                 |
| Wavelength                                          | 0.7293                                        | 0.7293                                        | 0.9794                                        | 0.9794                              | 1.1399                         |
| Resolution (Å)                                      | 40.0 – 0.80                                   | 40.0 – 1.0                                    | 40.0 – 1.1                                    | 50.0 – 1.7                          | 20.0 – 3.1                     |
| <i>R</i> <sub>meas</sub> (%) <sup>b</sup>           | 4.1 (94.5)                                    | 3.8 (12.1)                                    | 10.4 (111.0)                                  | 7.9 (155.6)                         | 13.5 (154.4)                   |
| <i>R</i> <sub>pim</sub> (%) <sup>b</sup>            | 1.3 (33.2)                                    | 1.2 (3.7)                                     | 2.1 (28.1)                                    | 1.3 (29.6)                          | 3.7 (41.8)                     |
| CC <sub>1/2</sub> <sup>b</sup>                      | 99.9 (66.4)                                   | 99.9 (99.6)                                   | 99.9 (66.6)                                   | 100.0 (74.5)                        | 99.8 (76.1)                    |
| <    σ   > <sup>b</sup>                             | 29.3 (2.3)                                    | 43.5 (18.8)                                   | 19.8 (2.1)                                    | 37.3 (2.2)                          | 20.2 (1.8)                     |
| Completeness (%) <sup>b</sup>                       | 88.4 (50.3)                                   | 97.1 (94.8)                                   | 95.4 (66.8)                                   | 91.1 (93.1)                         | 99.9 (99.3)                    |
| No. of observations                                 | 890,036                                       | 550,262                                       | 984,014                                       | 2,169,719                           | 147,214                        |
| No. of unique reflections <sup>b,c</sup>            | 92,712 (5,211)                                | 56,349 (5,425)                                | 42,372 (2,914)                                | 60,735 (6,155)                      | 10,957 (1,073)                 |
| Redundancy <sup>b</sup>                             | 9.6 (7.6)                                     | 9.8 (10.3)                                    | 23.2 (14.6)                                   | 35.7 (25.9)                         | 13.4 (13.2)                    |
| <b>Refinement</b>                                   |                                               |                                               |                                               |                                     |                                |
| Resolution (Å)                                      | 40.0 – 0.8                                    |                                               |                                               | 50.0 – 1.7                          |                                |
| No. of reflections                                  | 92,709                                        |                                               |                                               | 59,806                              |                                |
| No. of reflections test set                         | 4,650 (5.0%)                                  |                                               |                                               | 1,812 (3.0%)                        |                                |
| <i>R</i> <sub>work</sub> / <i>R</i> <sub>free</sub> | 11.8 / 13.2                                   |                                               |                                               | 16.3 / 21.0                         |                                |
| No. atoms (non-hydrogen)                            | 1,448                                         |                                               |                                               | 4,176                               |                                |
| Protein                                             | 1,192                                         |                                               |                                               | 3,632                               |                                |
| Water                                               | 253                                           |                                               |                                               | 466                                 |                                |
| Ligand/Ions                                         | 3                                             |                                               |                                               | 78                                  |                                |
| <i>B</i> -factors                                   | 15                                            |                                               |                                               | 38                                  |                                |
| Protein                                             | 11                                            |                                               |                                               | 37                                  |                                |
| Water                                               | 31                                            |                                               |                                               | 43                                  |                                |
| Ligand/Ions                                         | 16                                            |                                               |                                               | 73                                  |                                |
| RMSD                                                |                                               |                                               |                                               |                                     |                                |
| Bond lengths (Å)                                    | 0.008                                         |                                               |                                               | 0.010                               |                                |
| Bond angles (°)                                     | 1.1                                           |                                               |                                               | 1.0                                 |                                |
| <b>Ramachandran plot<sup>d</sup></b>                |                                               |                                               |                                               |                                     |                                |
| Favored (%)                                         | 98.6                                          |                                               |                                               | 99.3                                |                                |
| Additionally allowed (%)                            | 1.4                                           |                                               |                                               | 0.7                                 |                                |
| Outliers (%)                                        | 0.0                                           |                                               |                                               | 0.0                                 |                                |
| <b>MolProbity</b>                                   |                                               |                                               |                                               |                                     |                                |
| Clashscore <sup>d</sup>                             | 0.43 (95 <sup>th</sup> percentile)            |                                               |                                               | 0.96 (99 <sup>th</sup> percentile)  |                                |
| Molprobity score <sup>d</sup>                       | 0.65 (98 <sup>th</sup> percentile)            |                                               |                                               | 0.88 (100 <sup>th</sup> percentile) |                                |

<sup>a</sup>SSRL, Stanford Synchrotron Radiation Lightsource<sup>b</sup>Highest-resolution shell is shown in parentheses<sup>c</sup>Friedel pairs were merged<sup>d</sup>As determined by MolProbity<sup>e</sup>As a reference, two different high-resolution cutoffs are shown

**Table S10.**

Molecular masses and nucleoporin stoichiometry in composite structure

| <i>C. thermophilum</i><br>Protein                       | Stoichiometry | Molecular<br>Mass<br>(kDa) | Total<br>Mass<br>(kDa) |
|---------------------------------------------------------|---------------|----------------------------|------------------------|
| <b>Symmetric Core (observed in composite structure)</b> |               |                            |                        |
| Nup120                                                  | 32            | 141.8                      | 4537.6                 |
| Nup37                                                   | 32            | 80.3                       | 2569.6                 |
| -                                                       | -             | -                          | -                      |
| Nup85                                                   | 32            | 128.1                      | 4099.2                 |
| -                                                       | -             | -                          | -                      |
| Sec13                                                   | 32            | 33.8                       | 1081.6                 |
| Nup145C                                                 | 32            | 88.8                       | 2841.6                 |
| Nup84                                                   | 32            | 108.1                      | 3459.2                 |
| Nup133                                                  | 32            | 150.7                      | 4822.4                 |
| Nup170                                                  | 48            | 156.2                      | 7497.6                 |
| Nup192                                                  | 32            | 196.9                      | 6300.8                 |
| Nic96                                                   | 32            | 121.5                      | 3888.0                 |
| Nup57                                                   | 32            | 36.9                       | 1180.8                 |
| Nup49                                                   | 32            | 48.6                       | 1555.2                 |
| Nsp1                                                    | 32            | 67.1                       | 2147.2                 |
| Nup53                                                   | 48            | 47.0                       | 2256.0                 |
| Nup145N                                                 | 48            | 99.8                       | 4790.4                 |
| Nup188                                                  | 16            | 203.8                      | 3260.8                 |
| <b>TOTAL</b>                                            |               |                            | <b>56288.0</b>         |
| <b>Cytoplasmic Filaments</b>                            |               |                            |                        |
| -                                                       | -             | -                          | -                      |
| Nup159                                                  | -             | 156.2                      |                        |
| Nup82                                                   | -             | 98.1                       |                        |
| Gle1                                                    | -             | 58.0                       |                        |
| Gle2                                                    | -             | 39.4                       |                        |
| Nup42                                                   | -             | 58.0                       |                        |
| <b>Nuclear Basket</b>                                   |               |                            |                        |
| Mlp1                                                    | -             | 231.1                      |                        |
| Nup152                                                  | -             | 152.2                      |                        |
| Nup56                                                   | -             | 56.2                       |                        |
| ELYS                                                    | -             | 33.1                       |                        |
| <b>POMs/Other</b>                                       |               |                            |                        |
| Pom152                                                  | -             | 141.5                      |                        |
| -                                                       | -             | -                          |                        |
| Ndc1                                                    | -             | 71.8                       |                        |
| Pom34                                                   | -             | 34.2                       |                        |
| -                                                       | -             | -                          |                        |

| <i>H. Sapiens</i><br>Protein                            | Stoichiometry | Molecular<br>Mass<br>(kDa) | Total<br>Mass<br>(kDa) |
|---------------------------------------------------------|---------------|----------------------------|------------------------|
| <b>Symmetric Core (observed in composite structure)</b> |               |                            |                        |
| Nup160                                                  | 32            | 162.1                      | 5187.2                 |
| Nup37                                                   | 32            | 36.7                       | 1174.4                 |
| Nup43                                                   | 32            | 42.2                       | 1350.4                 |
| Nup85                                                   | 32            | 75.0                       | 2400.0                 |
| Seh1                                                    | 32            | 39.7                       | 1270.4                 |
| Sec13                                                   | 32            | 35.5                       | 1136.0                 |
| Nup96                                                   | 32            | 105.9                      | 3388.8                 |
| Nup107                                                  | 32            | 106.4                      | 3404.8                 |
| Nup133                                                  | 32            | 129.0                      | 4128.0                 |
| Nup155                                                  | 48            | 155.2                      | 7449.6                 |
| Nup205                                                  | 32            | 227.9                      | 7292.8                 |
| Nup93                                                   | 32            | 93.5                       | 2992.0                 |
| Nup54                                                   | 32            | 55.4                       | 1772.8                 |
| Nup58                                                   | 32            | 53.2                       | 1702.4                 |
| Nup62                                                   | 32            | 53.3                       | 1705.6                 |
| Nup53                                                   | 48            | 34.8                       | 1670.4                 |
| Nup98                                                   | 48            | 91.7                       | 4401.6                 |
| Nup188                                                  | 16            | 196.0                      | 3136.0                 |
| <b>TOTAL</b>                                            |               |                            | <b>55563.2</b>         |
| <b>Cytoplasmic Filaments</b>                            |               |                            |                        |
| Nup358                                                  | -             | 358.2                      |                        |
| Nup214                                                  | -             | 213.6                      |                        |
| Nup88                                                   | -             | 83.5                       |                        |
| Gle1                                                    | -             | 79.8                       |                        |
| Rae1                                                    | -             | 41.0                       |                        |
| Nup12                                                   | -             | 44.9                       |                        |
| <b>Nuclear Basket</b>                                   |               |                            |                        |
| TPR                                                     | -             | 267.3                      |                        |
| Nup153                                                  | -             | 153.9                      |                        |
| Nup50                                                   | -             | 50.1                       |                        |
| ELYS                                                    | -             | 252.5                      |                        |
| <b>POMs/Other</b>                                       |               |                            |                        |
| Gp210                                                   | -             | 205.1                      |                        |
| POM121                                                  | -             | 127.7                      |                        |
| NDC1                                                    | -             | 76.3                       |                        |
|                                                         |               |                            |                        |
| ALADIN                                                  | -             | 59.6                       |                        |
